# Supplementary material for: Minimally invasivE versus open total GAstrectomy (MEGA): study protocol for a multicentre randomised controlled trial (DRKS00025765)
Source: PubMed Central journal article supplement — BMJ Open. 2022 Oct 31;12(10):e064286. doi: 10.1136/bmjopen-2022-064286 (PMC9628650; doi:10.1136/bmjopen-2022-064286), 2022-10-31
Supplement: bmjopen-2022-064286.draft_revisions.pdf [file bmjopen-2022-064286.draft_revisions.pdf]

# BMJ Open

BMJ Open is committed to open peer review. As part of this commitment we make the peer review history of every article we publish publicly available.

When an article is published we post the peer reviewers' comments and the authors' responses online. We also post the versions of the paper that were used during peer review. These are the versions that the peer review comments apply to.

The versions of the paper that follow are the versions that were submitted during the peer review process. They are not the versions of record or the final published versions. They should not be cited or distributed as the published version of this manuscript.

BMJ Open is an open access journal and the full, final, typeset and author-corrected version of record of the manuscript is available on our site with no access controls, subscription charges or pay-per-view fees (<http://bmjopen.bmj.com>).

If you have any questions on BMJ Open's open peer review process please email [info.bmjopen@bmj.com](mailto:info.bmjopen@bmj.com)

# BMJ Open

## Minimally invasive versus open total Gastrectomy (MEGA): Study protocol for a multicenter randomized controlled trial (DRKS00025765)

|                               |                                                                                                                                                                                                                                                                                                                                                                                                                                                                                                                                                                                                                                                                                                                                                                                                                                                                                                                                                                                                                                                                                                                                                                                                                                                                                                                                                                                                                                                                                                                                                                                                                                                                                                                                                                                                                                                                                                                                                                                                                                                                                                                                                                                                                                  |
|-------------------------------|----------------------------------------------------------------------------------------------------------------------------------------------------------------------------------------------------------------------------------------------------------------------------------------------------------------------------------------------------------------------------------------------------------------------------------------------------------------------------------------------------------------------------------------------------------------------------------------------------------------------------------------------------------------------------------------------------------------------------------------------------------------------------------------------------------------------------------------------------------------------------------------------------------------------------------------------------------------------------------------------------------------------------------------------------------------------------------------------------------------------------------------------------------------------------------------------------------------------------------------------------------------------------------------------------------------------------------------------------------------------------------------------------------------------------------------------------------------------------------------------------------------------------------------------------------------------------------------------------------------------------------------------------------------------------------------------------------------------------------------------------------------------------------------------------------------------------------------------------------------------------------------------------------------------------------------------------------------------------------------------------------------------------------------------------------------------------------------------------------------------------------------------------------------------------------------------------------------------------------|
| Journal:                      | <i>BMJ Open</i>                                                                                                                                                                                                                                                                                                                                                                                                                                                                                                                                                                                                                                                                                                                                                                                                                                                                                                                                                                                                                                                                                                                                                                                                                                                                                                                                                                                                                                                                                                                                                                                                                                                                                                                                                                                                                                                                                                                                                                                                                                                                                                                                                                                                                  |
| Manuscript ID                 | bmjopen-2022-064286                                                                                                                                                                                                                                                                                                                                                                                                                                                                                                                                                                                                                                                                                                                                                                                                                                                                                                                                                                                                                                                                                                                                                                                                                                                                                                                                                                                                                                                                                                                                                                                                                                                                                                                                                                                                                                                                                                                                                                                                                                                                                                                                                                                                              |
| Article Type:                 | Protocol                                                                                                                                                                                                                                                                                                                                                                                                                                                                                                                                                                                                                                                                                                                                                                                                                                                                                                                                                                                                                                                                                                                                                                                                                                                                                                                                                                                                                                                                                                                                                                                                                                                                                                                                                                                                                                                                                                                                                                                                                                                                                                                                                                                                                         |
| Date Submitted by the Author: | 30-Apr-2022                                                                                                                                                                                                                                                                                                                                                                                                                                                                                                                                                                                                                                                                                                                                                                                                                                                                                                                                                                                                                                                                                                                                                                                                                                                                                                                                                                                                                                                                                                                                                                                                                                                                                                                                                                                                                                                                                                                                                                                                                                                                                                                                                                                                                      |
| Complete List of Authors:     | <p>Nickel, Felix; UniversitätsKlinikum Heidelberg, Department of General, Visceral and Transplantation Surgery<br/> Studier-Fischer, Alexander; UniversitätsKlinikum Heidelberg, Department of General, Visceral and Transplantation Surgery<br/> Haussmann, David; UniversitätsKlinikum Heidelberg, Department of General, Visceral and Transplantation Surgery<br/> Klotz, Rosa; UniversitätsKlinikum Heidelberg, Department of General, Visceral and Transplantation Surgery; Study Center of the German Society of Surgery<br/> Vogel-Adigozalov, Sophia; UniversitätsKlinikum Heidelberg, Department of General, Visceral and Transplantation Surgery; Study Center of the German Society of Surgery<br/> Tenckhoff, Solveig; UniversitätsKlinikum Heidelberg, Department of General, Visceral and Transplantation Surgery; Study Center of the German Society of Surgery<br/> Klose, Christina; UniversitätsKlinikum Heidelberg, Institute of Medical Biometry and Informatics<br/> Feisst, Manuel; UniversitätsKlinikum Heidelberg, Institute of Medical Biometry<br/> Zimmermann, Samuel; UniversitätsKlinikum Heidelberg, Institute of Medical Biometry<br/> Babic, Benjamin; University Hospital Cologne, Department of General, Visceral and Tumor and Transplantation Surgery<br/> Berlt, Felix; Johannes Gutenberg University Hospital Mainz, Department of General, Visceral and Transplantation Surgery<br/> Bruns, Christiane; University Hospital Cologne, Department of General, Visceral, Tumor and Transplantation Surgery<br/> Gockel, Ines; UniversitätsKlinikum Leipzig, Department of Visceral, Transplantation, Thoracic and Vascular Surgery<br/> Graf, Sandra; University Hospital Ulm, Department of General and Visceral Surgery<br/> Grimminger, Peter; Johannes Gutenberg University Hospital Mainz, Department of General, Visceral and Transplantation Surgery<br/> Gutschow, Christian; University Hospital Zurich, Department of Visceral and Transplantation Surgery<br/> Hoepfner, Jens; University Medical Center Schleswig Holstein Lübeck Campus, Department of Surgery<br/> Ludwig, Kaja; Klinikum Sudstadt Rostock, Department of General, Visceral, Thoracic and Vascular Surgery</p> |

|           |                                                                                                                                                                                                                                                                                                                                                                                                                                                                                                                                                                                                                                                                                                                                                                                                                                                                                                                                                                                                                              |
|-----------|------------------------------------------------------------------------------------------------------------------------------------------------------------------------------------------------------------------------------------------------------------------------------------------------------------------------------------------------------------------------------------------------------------------------------------------------------------------------------------------------------------------------------------------------------------------------------------------------------------------------------------------------------------------------------------------------------------------------------------------------------------------------------------------------------------------------------------------------------------------------------------------------------------------------------------------------------------------------------------------------------------------------------|
|           | Mirow, Lutz; Klinikum Chemnitz gGmbH, Department of General and Visceral Surgery<br>Mönig, Stefan; Geneva University Hospitals, Department of Digestive Surgery<br>Reim, Daniel; University Hospital Munich, Department of Surgery<br>Seyfried, Florian; Central Würzburg Hospital, Department of General, Visceral, Transplant, Vascular and Pediatric Surgery<br>Stange, Daniel; Technische Universität Dresden, Department of Visceral, Thoracic and Vascular Surgery<br>Billeter, Adrian; UniversitätsKlinikum Heidelberg, Department of General, Visceral, and Transplantation Surgery<br>Nienhüser, Henrik; UniversitätsKlinikum Heidelberg, Department of General, Visceral and Transplantation Surgery<br>Probst, Pascal; Kantonsspital Frauenfeld, Department of Surgery<br>Schmidt, Thomas; University Hospital Cologne, Department of General, Visceral and Tumor and Transplantation Surgery<br>Müller-Stich, Beat; UniversitätsKlinikum Heidelberg, Department of General, Visceral and Transplantation Surgery |
| Keywords: | SURGERY, ONCOLOGY, Gastrointestinal tumours < ONCOLOGY                                                                                                                                                                                                                                                                                                                                                                                                                                                                                                                                                                                                                                                                                                                                                                                                                                                                                                                                                                       |
|           |                                                                                                                                                                                                                                                                                                                                                                                                                                                                                                                                                                                                                                                                                                                                                                                                                                                                                                                                                                                                                              |

SCHOLARONE™  
Manuscripts

1  
2  
3 1 **Minimally invasivE versus open total GAstrectomy (MEGA): Study protocol for**  
4  
5 2 **a multicenter randomized controlled trial (DRKS00025765)**  
6

7  
8 3 Felix Nickel<sup>1\*</sup>, Alexander Studier-Fischer<sup>1\*</sup>, David Haussmann<sup>1</sup>, Rosa Klotz<sup>1,2</sup>, Sophia  
9  
10 4 Vogel-Adigozalov<sup>1,2</sup>, Solveig Tenckhoff<sup>1,2</sup>, Christina Klose<sup>3</sup>, Manuel Feisst<sup>3</sup>, Samuel  
11  
12 5 Zimmermann<sup>3</sup>, Benjamin Babic<sup>4</sup>, Felix Berlt<sup>5</sup>, Christiane Bruns<sup>4</sup>, Ines Gockel<sup>6</sup>,  
13  
14 6 Sandra Graf<sup>7</sup>, Peter Grimminger<sup>5</sup>, Christian Gutschow<sup>8</sup>, Jens Hoepfner<sup>9</sup>, Kaja  
15  
16 7 Ludwig<sup>10</sup>, Lutz Mirow<sup>11</sup>, Stefan Mönig<sup>12</sup>, Daniel Reim<sup>13</sup>, Florian Seyfried<sup>14</sup>, Daniel  
17  
18 8 Stange<sup>15</sup>, Adrian Billeter<sup>1</sup>, Henrik Nienhüser<sup>1</sup>, Pascal Probst<sup>16</sup>, Thomas Schmidt<sup>4</sup>,  
19  
20 9 Beat P. Müller-Stich<sup>1</sup>  
21  
22

23  
24 10

25  
26 11 \*Contributed equally  
27

28  
29 12

30  
31 13 <sup>1</sup>Department of General, Visceral and Transplantation Surgery, Heidelberg University  
32  
33 14 Hospital, Heidelberg, Germany  
34

35  
36 15 <sup>2</sup>Study Center of the German Society of Surgery, Heidelberg, Germany  
37

38  
39 16 <sup>3</sup>Institute of Medical Biometry, Heidelberg, Germany  
40

41  
42 17 <sup>4</sup>Department of General, Visceral and Tumor and Transplantation Surgery, Cologne  
43  
44 18 University Hospital, Cologne, Germany  
45

46  
47 19 <sup>5</sup>Department of General, Visceral and Transplantation Surgery, Mainz University  
48  
49 20 Hospital, Mainz, Germany  
50

51  
52 21 <sup>6</sup>Department of Visceral, Transplantation, Thoracic and Vascular Surgery, Leipzig  
53  
54 22 University Hospital, Leipzig, Germany  
55

56  
57 23 <sup>7</sup>Department of General and Visceral Surgery, Ulm University Hospital, Ulm,  
58  
59 24 Germany  
60

25  
26 25 <sup>8</sup>Department of Visceral and Transplantation Surgery, Zurich University Hospital,  
Zurich, Switzerland

1  
2  
3 27 <sup>9</sup>Department of Surgery, University Medical Center Schleswig-Holstein, Campus  
4  
5 28 Lübeck, Germany

6  
7  
8 29 <sup>10</sup>Department of General, Visceral, Thoracic and Vascular Surgery, Rostock Südstadt  
9  
10 30 Hospital, Rostock, Germany

11  
12 31 <sup>11</sup>Department of General and Visceral Surgery, Klinikum Chemnitz gGmbH,  
13  
14 32 Chemnitz, Germany

15  
16  
17 33 <sup>12</sup>Department of Digestive Surgery, Geneva University Hospital, Geneva, Switzerland

18  
19 34 <sup>13</sup>Department of Surgery, TUM University Hospital, Munich, Germany

20  
21 35 <sup>14</sup>Department of General, Visceral, Transplant, Vascular and Pediatric Surgery,  
22  
23 36 Würzburg University Hospital, Würzburg, Germany

24  
25  
26 37 <sup>15</sup>Department of Visceral, Thoracic and Vascular Surgery, Dresden University  
27  
28 38 Hospital, Dresden, Germany

29  
30 39 <sup>16</sup>Department of Surgery, Cantonal Hospital Frauenfeld, Thurgau, Switzerland

31  
32  
33 40

34  
35 41

36  
37 42 Correspondence & Trial Sponsor:

38  
39 43 Prof. Dr. Beat Müller, [BeatPeter.Mueller@med.uni-heidelberg.de](mailto:BeatPeter.Mueller@med.uni-heidelberg.de)

40  
41  
42 44 Department of General, Visceral and Transplantation Surgery, Heidelberg University

43  
44 45 Hospital, Im Neuenheimer Feld 420, 69120 Heidelberg, Germany

45  
46  
47 46

48  
49 47 **Abstract**

50  
51 48 **Introduction:**

52  
53 49 The only curative treatment for most gastric cancer is radical gastrectomy with D2

54  
55 50 lymphadenectomy (LAD). Minimally invasive total gastrectomy (MIG) aims to reduce

56  
57 51 postoperative morbidity, but its use has not yet been widely established in Western

58  
59  
60

1  
2  
3 52 countries. MEGA is the first Western multicenter randomized controlled trial (RCT) to  
4  
5 53 compare postoperative morbidity following MIG versus open total gastrectomy (OG).  
6  
7  
8 54

9  
10 55 **Methods and analysis:**

11  
12 56 This superiority multicenter RCT compares MIG (intervention) to OG (control) for  
13  
14 57 oncological total gastrectomy with D2 or D2+ LAD. Recruitment is expected to last for  
15  
16 58 2 years. Inclusion criteria comprise age between 18 and 84 years and planned total  
17  
18 59 gastrectomy after initial diagnosis of gastric carcinoma. Exclusion criteria include  
19  
20 60 ECOG performance status > 2 (**Appendix 1**), tumors requiring extended gastrectomy  
21  
22 61 or less than total gastrectomy, previous abdominal surgery or extensive adhesions  
23  
24 62 seriously complicating MIG, other active oncologic disease, advanced stages (T4 or  
25  
26 63 M1), emergency setting, and pregnancy.

27  
28  
29 64 The sample size was calculated at 80 participants per group. The primary endpoint is  
30  
31 65 30-day postoperative morbidity as measured by the Comprehensive Complications  
32  
33 66 Index (CCI). Secondary endpoints include postoperative morbidity and mortality,  
34  
35 67 adherence to a fast-track protocol, and patient-reported quality of life (QoL) scores  
36  
37 68 (QoR-15, EUROQOL EQ-5D-5L, EORTC QLQ-C30, EORTC QLQ-STO22, ADLs,  
38  
39 69 and BIS). Oncologic endpoints include rate of R0 resection, lymph node yield,  
40  
41 70 disease-free survival, and overall survival at 60-month follow-up.  
42  
43  
44  
45  
46  
47  
48

49 72 **Ethics and dissemination:**

50  
51 73 Ethical approval has been received by the independent Ethics Committee of the  
52  
53 74 Medical Faculty, University of Heidelberg (S-816/2021) and will be received from  
54  
55 75 each responsible ethics committee for each individual participating center prior to  
56  
57 76 recruitment. Results will be published open access.  
58  
59  
60

77

1  
2  
3 78 **Trial registration:** German Clinical Trials Register DRKS00025765. Registered on  
4  
5 79 December 22<sup>nd</sup>, 2021.  
6  
7  
8 80  
9

10 81 **Keywords:** Minimally invasive gastrectomy, total gastrectomy, gastric cancer, Roux-  
11  
12 82 Y reconstruction, linear stapled anastomosis, circular stapled anastomosis,  
13  
14 83 randomized controlled trial, comprehensive complication index, fast-track, enhanced  
15  
16  
17 84 recovery after surgery  
18  
19 85

20  
21 86 **Strengths and limitations of this study**  
22

- 23  
24 87 - MEGA is the first Western multicenter RCT to specifically compare OG with  
25  
26 88 MIG in terms of postoperative morbidity using the comprehensive complication  
27  
28 89 index (CCI).  
29  
30 90 - Usage of the CCI as a comprehensive outcome measure allows for objective  
31  
32 91 comparisons with other trials.  
33  
34 92 - Differentiation between robotic and laparoscopic total gastrectomy will be  
35  
36 93 made in the explorative subgroup analysis only.  
37  
38 94 - High levels of standardization, intraoperative photo documentation, large  
39  
40 95 group sizes, and risk-based monitoring by the Study Center of the German  
41  
42 96 Society of Surgery (SDGC) will guarantee objective data acquisition, increase  
43  
44 97 patients' adherence to the protocol, and ultimately lead to exceptional data  
45  
46 98 quality.  
47  
48  
49  
50

51 99  
52  
53  
54  
55  
56  
57  
58  
59  
60

## 100 Introduction

101 Gastric cancer is the sixth most common tumor disease in the world and causes the  
102 second most deaths [1]. In 2018, approximately one million patients worldwide and  
103 approximately 15,000 patients in Germany were diagnosed with gastric cancer, of  
104 which an average of 76% die from the disease [1]. Gastric cancer causes one of the  
105 highest oncologic disease burdens as measured by lost disability-adjusted life years  
106 (DALY). This fact highlights the aggressiveness of the disease. Age-adjusted DALY  
107 rates per 100,000 reach 241 for men and 146 for women, ranking 4th after liver, lung,  
108 and breast cancer [2, 3].

109 Currently, the only therapy that offers a chance of cure is gastrectomy, with a 5-year  
110 survival rate of 20-30% and postoperative morbidity and mortality as high as 63% [4]  
111 and 11% [5-10], even at experienced centers [4-18]. Therefore, there is a great need  
112 to identify the optimal surgical approach using evidence from multicenter data in  
113 order to improve oncologic outcome and to decrease postoperative complications.

114 The current gold standard is open gastrectomy (OG) with D2 lymphadenectomy  
115 (LAD) (**Appendix 2**), but its highly invasive nature leads to potentially high  
116 complication rates, especially in elderly and obese patients. These frequent  
117 postoperative complications result in higher mortality, lower QoL, a longer hospital  
118 stay, and thus a higher burden on the health care system [6, 19]. In other fields of  
119 visceral surgery, such as appendectomy, cholecystectomy, obesity surgery, and  
120 esophagectomy, minimally invasive surgery has already replaced the open approach  
121 as the standard of care [7, 20-22]. Several randomized controlled trials (RCT) have  
122 demonstrated reduced postoperative complications following minimally invasive  
123 surgery compared to the open approach. This finding is due to the procedure's  
124 resulting smaller wounds, reduced operative trauma, lower blood loss, shorter  
125 hospital stay, and faster rehabilitation time [22-24].



1  
2  
3 126 Postoperative complications, however, are not only important for the immediate  
4  
5 127 postoperative course, which is usually secondary in relevance, but can also affect  
6  
7 128 long-term oncologic outcome [25-27]. In a study of 432 patients with curative  
8  
9 129 gastrectomy and D2 LAD for treatment of gastric cancer, the occurrence of  
10  
11 130 postoperative in-hospital complications was an independent predictor of worse 5-year  
12  
13 131 survival (22% vs. 40%). This can be perceived as an indication that postoperative  
14  
15 132 complications may lead to higher mortality in the long term [28]. Therefore, the trend  
16  
17 133 towards favoring minimally invasive gastrectomy (MIG) for gastric cancer is  
18  
19 134 increasing.  
20  
21  
22  
23  
24  
25

## 26 136 **Methods and analysis**

### 27 137 **Setting**

28  
29  
30 138 The MEGA trial is a prospective randomized, controlled, non-blinded, two-armed  
31  
32 139 multicenter surgical superiority trial with a confirmatory character. It includes 14  
33  
34 140 surgical centers in Germany and Switzerland and is coordinated by the Department  
35  
36 141 of General, Visceral and Transplantation Surgery at Heidelberg University Hospital,  
37  
38 142 in Germany. Recruitment is planned for 2 consecutive years. The study protocol was  
39  
40 143 accepted by the Independent Ethics Committee of the Medical Faculty, University of  
41  
42 144 Heidelberg (registration number S-816/2021) prior to recruitment. The trial was  
43  
44 145 registered at DRKS under the registration number DRKS00025765 on December  
45  
46 146 22<sup>nd</sup>, 2021 [29]. No secondary identifying numbers such as a Universal Trial Number  
47  
48 147 have been assigned. Recommendations of the SPIRIT (Standard Protocol Items:  
49  
50 148 Recommendations for Interventional Trials) checklist were followed [30].  
51  
52  
53  
54  
55  
56  
57  
58  
59  
60

149  
150  
151

## 152 **Patient recruitment**

153 Recruitment is planned to take place at 14 surgical centers in Germany and  
154 Switzerland. Certain eligibility criteria have to be met by the participating centers and  
155 surgeons in order to eliminate bias from inexperience or learning curves. Therefore,  
156 hospitals need to have a case load of  $\geq 20$  gastrectomies per year, and every trial  
157 surgeon has to provide evidence of at least 20 previously performed surgeries of the  
158 respective surgical procedure/s he or she wants to contribute [OG, laparoscopic  
159 gastrectomy (LAG) or robotic-assisted gastrectomy (RAG)]. Eligible patients will be  
160 screened consecutively to eliminate selection bias and will receive diagnostic staging  
161 laparoscopy prior to randomization.

### 162 Inclusion criteria:

- 163 - Age between 18 and 84 years
- 164 - Planned total gastrectomy after first diagnosis of gastric carcinoma
- 165 - Ability of patient to understand character and consequences of the trial
- 166 - Written informed consent

### 167 Exclusion criteria:

- 168 - ECOG performance status  $> 2$
- 169 - Planned extended gastrectomy or less than total gastrectomy (e.g.,  
170 adenocarcinoma of the esophagogastric junction (AEG) I and AEG II, or distal  
171 gastric tumors of an intestinal subtype)
- 172 - Previous gastric surgery or extensive adhesions seriously complicating MIG
- 173 - Other active oncologic disease or history of cancer limiting prognosis in  
174 comparison to the gastric cancer
- 175 - Emergency setting
- 176 - Language barriers rendering the patient unable to fill out patient-reported  
177 outcome questionnaires

- 1  
2  
3 178 - Participation in another intervention trial that might interfere with the  
4  
5 179 intervention and/or outcome of this trial  
6  
7  
8 180 - Pregnancy  
9

10 181 Exclusion criteria previously or during staging laparoscopy:

- 11  
12 182 - T4  
13  
14 183 - M1  
15  
16

17 184 Inclusion takes place after the staging laparoscopy, and patients will be randomized  
18  
19 185 to the intervention arm (MIG) or the control arm (OG) (**Figure 1**).  
20  
21 186

### 23 187 **Trial duration and schedule**

24  
25 188 Recruitment is planned to take 24 months. The duration of the trial for each patient is  
26  
27 189 expected to be 1 month for the primary endpoint and 60 months for the secondary  
28  
29 190 endpoints with long-term follow-up. Consequently, the duration of data collection is  
30  
31 191 expected to be 25 months for the primary endpoint and 84 months for the secondary  
32  
33 192 endpoints [first-patient-in (FPI) to last-patient-out (LPO)]. Trial analysis will take an  
34  
35 193 additional 6 months. The actual overall duration or recruitment time may differ.  
36  
37 194 Recruitment is planned to be active until both arms contain at least 80 patients in the  
38  
39 195 intention-to-treat (ITT) dataset.  
40  
41  
42  
43  
44  
45  
46

### 47 197 **Trial visits**

48  
49 198 Patients will be monitored intraoperatively, on postoperative days (POD) 1, 3, and 5,  
50  
51 199 and on the day of discharge. Follow-up will be conducted on POD 30, 90, and after  
52  
53 200 postoperative months (POM) 6, 12, 24, 36, 48, and 60 (**Table 1**). Demographic and  
54  
55 201 baseline clinical data, intraoperative findings, and postoperative results will be  
56  
57 202 recorded. During follow-up, patients will complete established and validated  
58  
59 203 questionnaires. To enhance participant retention and to avoid loss to follow-up,  
60

204 patients will be contacted for the completion of questionnaires and to collect missing  
 205 data. Informed consent will be obtained and trial data will be collected by trained  
 206 assessors using electronic case report forms (eCRFs).

207

208 **Table 1 | Trial visits and overview over documented parameters & outcomes**

| Activity & Documentation                                            | Visit 1 (screening) | Visit 2 (laparosc.) | Visit 3 (surgery) | Visit 4-6 (POD 1, 3, 5) | Visit 7 (dis-charge) | Visit 8-9 (POD 30, 90) | Visit 10-15 (POM 6, 12, 24, 36, 48, 60) |
|---------------------------------------------------------------------|---------------------|---------------------|-------------------|-------------------------|----------------------|------------------------|-----------------------------------------|
| inclusion & exclusion criteria                                      | X                   |                     |                   |                         |                      |                        |                                         |
| informed consent                                                    | X                   |                     |                   |                         |                      |                        |                                         |
| medical history & preoperative assessment*                          | X                   |                     |                   |                         |                      |                        |                                         |
| randomization                                                       |                     | X                   |                   |                         |                      |                        |                                         |
| surgical & anaesthetic documentation**                              |                     |                     | X                 |                         |                      |                        |                                         |
| <b>Postoperative morbidity measured with CCI (primary endpoint)</b> | X                   |                     | X                 | X                       | X                    | X                      |                                         |
| <b>scores / questionnaires</b>                                      |                     |                     |                   |                         |                      |                        |                                         |
| EUROQOL EQ-5D-5L                                                    | X                   |                     |                   |                         | X                    | X                      | X                                       |
| EORTC QLQ-C30                                                       | X                   |                     |                   |                         | X                    | X                      | X                                       |
| EORTC QLQ-STO22                                                     | X                   |                     |                   |                         | X                    | X                      | X                                       |
| QoR-15                                                              |                     |                     |                   | X (V5)                  |                      |                        |                                         |
| ADLs                                                                | X                   |                     |                   | X                       | X                    | X                      | X                                       |
| BIS                                                                 |                     |                     |                   |                         |                      |                        | X (V13)                                 |
| <b>biological specimen retrieval</b>                                |                     |                     |                   |                         |                      |                        |                                         |
| EDTA blood samples                                                  | X                   |                     |                   |                         |                      |                        |                                         |
| formalin and paraffin tissue samples                                |                     |                     | X                 |                         |                      |                        |                                         |
|                                                                     | Visit 1 (screening) | Visit 2 (laparosc.) | Visit 3 (surgery) | Visit 4-6 (POD 1, 3, 5) | Visit 7 (dis-charge) | Visit 8-9 (POD 30, 90) | Visit 10-15 (POM 6, 12, 24, 36, 48, 60) |
| <b>Short-term clinical data</b>                                     |                     |                     |                   |                         |                      |                        |                                         |
| Conversion rate                                                     |                     |                     | X                 |                         |                      |                        |                                         |
| Operation time                                                      |                     |                     | X                 |                         |                      |                        |                                         |
| Blood loss                                                          |                     |                     | X                 |                         |                      |                        |                                         |
| Length of stay in the ICU                                           |                     |                     | X                 |                         | X                    |                        |                                         |
| Length of hospital stay                                             |                     |                     |                   |                         | X                    |                        |                                         |
| Pain and postoperative analgesic required                           |                     |                     |                   | X                       | X                    |                        |                                         |
| Laboratory parameters (CRP, leucocytes)                             |                     |                     |                   | X                       | X                    |                        |                                         |
| Mobilization of the patient                                         |                     |                     |                   | X                       |                      |                        |                                         |
| Quality of the patient's recovery                                   |                     |                     |                   | X                       |                      |                        |                                         |
| Quality of life                                                     | X                   |                     |                   |                         | X                    | X                      | X                                       |
| Adherence to a fast-track gastrectomy SOP                           |                     |                     | X                 | X                       | X                    |                        |                                         |
| Subjective evaluation of anastomoses                                |                     |                     | X                 |                         |                      |                        |                                         |
| First bowl function and mobilization                                |                     |                     |                   | X                       |                      |                        |                                         |
| Wound healing deficits                                              |                     |                     |                   | X                       | X                    | X (V8)                 |                                         |
| Vegetative function                                                 |                     |                     |                   |                         |                      | X                      | X                                       |
| Necessity of interventions due to complications                     |                     |                     |                   | X                       | X                    | X                      | X                                       |
| <b>Oncologic short-term data</b>                                    |                     |                     |                   |                         |                      |                        |                                         |
| Number of lymph nodes removed and of tumor-positive lymph nodes     |                     |                     | X                 |                         |                      |                        |                                         |
| Number of R0 resections                                             |                     |                     | X                 |                         |                      |                        |                                         |
| Development of tumor markers                                        |                     |                     | X                 |                         |                      |                        |                                         |
| Tumor histopathology                                                |                     |                     | X                 |                         |                      |                        |                                         |
| <b>Long-term clinical data (5-year follow-up)</b>                   |                     |                     |                   |                         |                      |                        |                                         |
| Changes of body weight                                              |                     |                     |                   |                         | X                    | X                      | X                                       |
| Quality of life                                                     | X                   |                     |                   |                         | X                    | X                      | X                                       |
| Incidence of incisional hernias                                     |                     |                     |                   |                         |                      | X                      | X                                       |
| Incidence of reoperations                                           |                     |                     |                   | X                       | X                    | X                      | X                                       |
| Incidence of stenosis                                               |                     |                     |                   |                         |                      | X                      | X                                       |
| Cosmetic results and scar                                           |                     |                     |                   |                         |                      |                        | X (V13)                                 |

|  |                                                           |  |  |  |  |  |        |   |
|--|-----------------------------------------------------------|--|--|--|--|--|--------|---|
|  | satisfaction                                              |  |  |  |  |  |        |   |
|  | <b>Oncologic long-term data (5-year follow-up)</b>        |  |  |  |  |  |        |   |
|  | Oncologic treatment (adjuvant and consecutive therapy)    |  |  |  |  |  | X      | X |
|  | Disease-free survival; DFS; recurrence free survival; RFS |  |  |  |  |  | X (v9) | X |
|  | Local recurrence; LR                                      |  |  |  |  |  | X (v9) | X |
|  | Relapse-free survival; RFS                                |  |  |  |  |  | X (v9) | X |
|  | Progression-free survival; PFS                            |  |  |  |  |  | X (v9) | X |
|  | Time to progression; TTP                                  |  |  |  |  |  | X (v9) | X |
|  | Overall survival; OS                                      |  |  |  |  |  | X (v9) | X |

209

210 \* Includes body mass index, ASA status, preoperative oncological status, prior  
 211 surgical treatment, drug use and comorbidities. \*\* Includes surgical documentation  
 212 (surgeons, procedures, complications, drains) & anesthesiology documentation. \*\*\*  
 213 Includes dysphagia, reflux, and dumping syndromes. \*\*\*\* Includes entity, TNM,  
 214 grading, and resection status. ASA American Society of Anesthesiologists  
 215 classification, POD postoperative day, POM postoperative month, QoL quality of life,  
 216 EUROQOL EQ-5D-5L EuroQoL Group Questionnaire for Quality of Life with 5  
 217 dimensions and 5 levels, EORTC QLQ-C30 European Organisation for Research  
 218 and Treatment of Cancer Quality of Life Questionnaire Core 30, EORTC QLQ-  
 219 STO22 European Organisation for Research and Treatment of Cancer Quality of Life  
 220 Questionnaire for Gastric Cancer, QoR-15 Quality of Recovery 15, ADLs activities of  
 221 daily living (**Appendix 3**), BIS Body Image Scale, ITT intention-to-treat, VAS visual  
 222 analog scale of pain, need for ICU intermediate / intensive care unit, CCI  
 223 Comprehensive Complication Index for complications & related interventions  
 224 according to the Clavien-Dindo classification (**Appendix 4**).

225

### 226 **Primary endpoint**

227 The primary endpoint will be postoperative morbidity measured using the  
 228 Comprehensive Complication Index (CCI) until postoperative day 30 [31]. Usage of  
 229 this index will enable a comparison of the severity of postoperative complications with  
 230 results from other trials [32, 33]. Postoperative morbidity is defined as any deviation

1  
2  
3 231 from the normal postoperative course according to the Clavien-Dindo classification  
4  
5 232 [34]. This includes anastomotic insufficiency or loss of anastomotic integrity verified  
6  
7 233 by either CT scan with detection of contrast agent external to the anastomosis,  
8  
9 234 endoscopy, or the detection of methylene blue in a drain following oral intake.  
10  
11  
12  
13

235

### 236 **Secondary endpoints**

17 237 Secondary endpoints can be separated into short-term clinical and oncological  
18  
19 238 endpoints as well as long-term clinical and oncological endpoints (at 5-year follow-up,  
20  
21 239 as measured from the date of surgery) and can be found in **Table 1**.  
22  
23

240

### 241 **Standardized therapy and trial interventions**

28 242 **Control:** Total OG with D2/D2+ LAD.

30 243 **Intervention:** Total MIG with D2/D2+ LAD either as LAG or RAG. A mini-laparotomy  
31  
32 244 or a Pfannenstiel incision ( $\leq 8$  cm incision in both the skin and fascia) may be  
33  
34 245 performed for specimen removal.  
35  
36

37 246 Modified cardia-preserving total gastrectomy (preservation of gastroesophageal  
38  
39 247 junction) can also be accepted, but only if the short gastric vessels are dissected as  
40  
41 248 well, and if LAD is the same as for total gastrectomy. Besides the open or minimally-  
42  
43 249 invasive approach, the remaining treatment is identical in both groups. Any other  
44  
45 250 form of gastrectomy, explicitly conventional subtotal gastrectomy (preserved short  
46  
47 251 gastric vessels and limited LAD of station 2 and 4sa), extended gastrectomy, and  
48  
49 252 distal gastrectomy with Billroth I or II reconstruction are not allowed. Reconstruction  
50  
51 253 can be of any form including Roux-Y reconstruction, interposition, or pouch  
52  
53 254 reconstruction. Any other step of the procedure such as antibiotic prophylaxis,  
54  
55 255 placement of abdominal drains, and closure of the abdominal wall can be performed  
56  
57 256 according to in-house standards. D2 LAD is defined according to the Japanese  
58  
59  
60

1  
2  
3 257 classification [35], with stations 1, 2, 3a, 3b, 4sa, 4sb, 4d, 5, 6, 7, 8a, 9, 11p, 11d, and  
4  
5 258 12a obligatory for the MEGA trial (**Figure 2**). Station 10 is optional. Incomplete LAD  
6  
7 259 is not allowed and has to be documented as a protocol deviation.

8  
9  
10 260 Removal of further stations (8b, 12b, 12p, 13, 14v, 14a, 15, 16a1, 16a2, 16b1, 16b2,  
11  
12 261 17, 18, 19, 20, 110, 111, and 112) is allowed when deemed appropriate, e.g., in case  
13  
14 262 of assumed tumor invasion, and has to be documented as D2+.

15  
16  
17 263

### 18 19 264 **Postoperative management**

20  
21 265 Postoperative management should be performed in a fast-track approach with short  
22  
23 266 durations until patient mobilization, drainage removal, and first oralization of food.

24 267 The patient should be extubated immediately after surgery and transferred to a  
25  
26 268 normal ward, if possible. Further specifications for the postoperative course will be  
27  
28 269 outlined in the provided standard operating procedure (SOP) for fast-track  
29  
30 270 gastrectomy. The last in-hospital trial visit takes place on the day of discharge.  
31  
32 271 Subsequent trial visits will be conducted via telephone. These will be questionnaire-  
33  
34 272 based and focus on CCI (until POD 90), quality of life, and oncologic outcome.

35  
36  
37 273

### 38 39 274 **Randomization and blinding**

40  
41  
42 275 In order to ensure equal distribution of patient characteristics between both trial arms,  
43  
44 276 randomization will be performed using a web-based randomization tool  
45  
46 277 ([www.randomizer.at](http://www.randomizer.at)). Randomization will take place following diagnostic laparoscopy  
47  
48 278 (Visit 2). The allocation pattern is masked, block-randomized with variable block  
49  
50 279 length, and stratified across centers. Due to the pragmatic character of the trial,  
51  
52 280 blinding of the surgeon is not feasible.

53  
54  
55 281

### 56 57 282 **Quality assurance and quality management**

### 283 **Clinical data monitoring**

284 Clinical monitoring will be performed by independent monitors at the Study Center of  
285 the German Society of Surgery (SDGC). The monitoring strategy will comprise a  
286 combination of centralized and onsite monitoring and will be described in a trial  
287 specific monitoring plan. To confirm site selection, pre-study visits will be performed.  
288 On-site monitoring will focus on patient informed consent, safety, and surgical  
289 procedures as well as the correct recording and documentation of the primary and  
290 secondary endpoints by source data verification (SDV).

291

### 292 **Surgical quality control**

293 Several steps are necessary to ensure and evaluate surgical quality:

- 294 1) Trial surgeons must have performed 20 surgeries in the respective approach  
295 (OG, LAG, or RAG), depending on the trial arm they will contribute to.
- 296 2) Each trial surgeon must provide photographic or video documentation of a  
297 former procedure.
- 298 3) Each trial surgeon has to provide photographic or video documentation of the  
299 trial procedures, which will be assessed by an expert. This photographic or  
300 video documentation is defined as follows:
  - 301 a. lymph node station 7 (left gastric artery) after dissection
  - 302 b. lymph node station 8a (common hepatic artery) after dissection
  - 303 c. lymph node station 9 (celiac artery) after dissection
  - 304 d. lymph node station 10 (splenic hilum) after dissection
  - 305 e. lymph node station 11p (proximal splenic artery) after dissection
  - 306 f. lymph node station 11d (distal splenic artery) after dissection
  - 307 g. lymph node station 12a (hepatoduodenal ligament along the hepatic  
308 artery) after dissection



- 1  
2  
3 309 h. duodenal stump  
4  
5 310 i. all anastomoses  
6  
7 311 j. incision for specimen retrieval in MIG  
8  
9

10 312

11  
12 313 **Assessment of safety**

13  
14 314 Since the primary endpoint is postoperative complications as measured by the CCI,  
15  
16 315 adverse (AE) and serious adverse events (SAE) are already captured and no  
17  
18 316 additional safety analysis will be performed (**Table 2**).  
19  
20

21 317

22  
23  
24 318 **Table 2: Grading of Adverse Events**

| Clavien-Dindo          | Adverse event (AE) | Serious adverse event (SAE) | Minor complication | Major complication |
|------------------------|--------------------|-----------------------------|--------------------|--------------------|
| Grade I complication   | AE                 |                             | Minor complication |                    |
| Grade II complication  |                    |                             |                    |                    |
| Grade III complication |                    |                             |                    | Major complication |
| Grade IV complication  |                    | SAE                         |                    |                    |
| Grade V complication   |                    |                             |                    |                    |

25  
26  
27  
28  
29  
30  
31  
32  
33  
34  
35  
36  
37  
38  
39  
40  
41  
42  
43 31944  
45  
46 320 **Data management**

47  
48 321 The Institute of Medical Biometry (IMBI) is responsible for data management within  
49  
50 322 this trial. An eCRF will be used for data collection. To assure safe and secure data  
51  
52 323 use and storage, data transmission is encrypted with secure socket layer (SSL)  
53  
54 324 technology. Only authorized users are able to enter or edit data, and access is further  
55  
56 325 restricted to data of the patients in that user's respective center only. All changes to  
57  
58 326 data are logged with a computerized timestamp in an audit trail. All data will be  
59  
60

1  
2  
3 327 pseudonymized. To guarantee high data quality, data validation rules will be defined  
4  
5 328 in a data validation plan. Completeness, validity, and plausibility of data will be  
6  
7 329 checked at the time of data entry (edit-checks) and using validating programs, which  
8  
9 330 will generate queries. If no further corrections are to be made in the database, eCRF  
10  
11 331 data will be locked. Data will finally be downloaded and used for statistical analysis.  
12  
13 332 All data management procedures will be conducted according to written defined  
14  
15 333 standard operating procedures (SOPs) of the IMBI that guarantee efficient conduct in  
16  
17 334 compliance with Good Clinical Practice (GCP). At the end of the study, the data will  
18  
19 335 be transformed into different data formats (e.g., csv-files) for archiving and to ensure  
20  
21 336 that it can be re-used.  
22  
23  
24  
25  
26  
27  
28  
29  
30

## 31 339 **Statistical methods**

### 32 340 **Sample size**

33  
34  
35 341 The sample size calculation is based on the primary endpoint “postoperative  
36  
37 342 morbidity as measured with the CCI until POD 30.” A decrease of the CCI by 10  
38  
39 343 points between OG and MIG is considered relevant by patients and clinicians, and a  
40  
41 344 conservative standard deviation of 20 is assumed based on existing literature for  
42  
43 345 upper GI surgery [36], leading to an effect size of  $d=0.5$ . Based on a t-test with a two-  
44  
45 346 sided significance level of  $\alpha=0.05$ , a sample size of  $n=128$  patients (64 per group)  
46  
47 347 has to be recruited to achieve a power of 80%. The primary endpoint will be analyzed  
48  
49 348 with a linear mixed regression model, which leads to equal or even increased power  
50  
51 349 when compared to a two-sided t-test. To compensate for drop-outs and patients lost  
52  
53 350 to follow-up, a further 20% of patients will be randomized, leading to a total sample  
54  
55 351 size of  $n=160$  (80 per group;  $80 \times 0,8 = 64.8$ ). The number of patients to be screened  
56  
57  
58  
59  
60

1  
2  
3 352 (n=400 to be assessed for eligibility;  $400 \times 0.5 \times 0.8 = 160$ ) was calculated with an  
4  
5 353 assumed 50% participation rate and an exclusion rate of 20%.

6  
7 354 Randomized & allocated (n = 160; 80 per group)

8  
9  
10 355 Intention-to-treat dataset (n = 160; 80 per group)

11  
12 356 Per-protocol dataset (n = 136; 72 and 64)

13  
14  
15 357

## 16 17 358 **Statistical analysis**

18  
19 359 For the examination of the primary endpoint “postoperative morbidity measured with  
20  
21 360 the CCI until POD 30,” the hypotheses to be assessed in the primary analysis are as  
22  
23 361 follows:  $H_0: \mu_1 = \mu_2$  vs  $H_1: \mu_1 \neq \mu_2$ , where  $\mu_1$  and  $\mu_2$  denote the mean CCI in the  
24  
25 362 control and intervention groups, respectively. The significance level is set to a two-  
26  
27 363 sided  $\alpha=0.05$ . Therefore, the primary endpoint will be examined using a linear mixed  
28  
29 364 model adjusting for the variables age and treatment group, as well as the surgical  
30  
31 365 center as a random effect (due to the stratified randomization and relatively large  
32  
33 366 number of centers in relation to the sample size, inclusion of center as a random  
34  
35 367 effect is recommended). Details of the primary model (e.g., handling of missing  
36  
37 368 values, sensitivity analyses) will be fully described in the statistical analysis plan.

38  
39  
40 369 The number of patients included in the primary analysis is determined as the full  
41  
42 370 analysis set. Patients will be analyzed in the group they were randomized to  
43  
44 371 (converted patients remain in their group). This reflects an analysis according to the  
45  
46 372 intention to treat (ITT) principle. Specific events (e.g., death) that can occur after  
47  
48 373 randomization will be handled within the primary endpoint definition, reflecting a  
49  
50 374 composite strategy [according to the ICH E9 (R1) addendum]. Other post  
51  
52 375 randomization events will not be considered. This choice reflects our treatment policy  
53  
54 376 approach.

1  
2  
3 377 In general, for the full analysis set, all baseline values and secondary outcomes will  
4  
5 378 be evaluated descriptively, with p-values reported alongside 95% confidence  
6  
7 379 intervals for the corresponding effects. Furthermore, secondary endpoints will be  
8  
9  
10 380 evaluated descriptively, using appropriate regression models. Time-to-event  
11  
12 381 endpoints will be evaluated by methods of survival analysis including Kaplan-Meier  
13  
14 382 methods and Cox proportional hazards models. In addition, subgroup analyses  
15  
16 383 (including age, gender, tumor stage, tumor grade, histological tumor type, linear vs.  
17  
18 384 circular stapler for proximal anastomosis, linear vs. hand-sewn for distal  
19  
20 385 anastomosis, type of retrieval incision, and intraoperative conversion) will be carried  
21  
22  
23 386 out. A detailed and comprehensive statistical analysis plan will be written shortly after  
24  
25 387 the first patient is recruited. All analyses will be performed using SAS version 9.4 or  
26  
27  
28 388 higher.

30 389

31 390

## 32 391 **Discussion**

33 392 We performed a systematic literature search prior to planning this trial and identified  
34  
35 393 974 publications. Of those, 17 RCTs comparing LAG with OG [7, 37-55] and two  
36  
37 394 RCTs comparing RAG with OG [56, 57] were found to be relevant. The studies  
38  
39 395 showed comparable oncologic and short-term postoperative outcomes for MIG and  
40  
41 396 OG. However, 16 of the 19 studies were conducted in China, Korea, and Japan [7,  
42  
43 397 38-50, 56, 57]. These countries have a significantly higher incidence of gastric  
44  
45 398 cancer, which consequently leads to significantly higher surgical volume and  
46  
47 399 expertise among the participating centers [58]. In addition, the body constitution of  
48  
49 400 Asian patients is often different from that of Western patients, which limits the direct  
50  
51 401 transferability of study results. Also, the incidence of gastric cancer is lower in  
52  
53 402 Western populations and advanced disease stages are more frequently detected,

1  
2  
3 403 because screening is less common. Therefore, it is unclear whether these results  
4  
5 404 would be reproducible in a Western population.  
6

7  
8 405 Currently, there have only been three non-Asian RCTs directly comparing LAG and  
9  
10 406 OG. The first RCT, by Huscher et al., focused exclusively on distal gastrectomy, did  
11  
12 407 not define any specific primary or secondary endpoints, and included a total of 59  
13  
14 408 patients [37]. Due to the missing differentiation between primary and secondary  
15  
16 409 endpoints, the trial can be perceived as methodically limited and was most likely  
17  
18 410 underpowered. However, no significant difference was found in perioperative  
19  
20 411 outcome, oncologic outcome, or mortality [morbidity rates: 26.7% (LAG) and 27.6%  
21  
22 412 (OG), lymph nodes harvested:  $30.0 \pm 14.9$  (LAG) and  $33.4 \pm 17.4$  (OG), operative  
23  
24 413 mortality rates: 3.3% (LAG) and 6.7% (OG), 5-year survival rate: 54.8% (LAG) and  
25  
26 414 55.7% (OG)].  
27  
28  
29

30  
31 415 The only two currently existing relevant Western multicenter RCTs comparing open  
32  
33 416 versus minimally invasive oncologic total gastrectomy are the LOGICA trial [52, 53]  
34  
35 417 and the STOMACH trial [51, 54, 55], which were both published in 2021.  
36

37  
38 418 The LOGICA trial is a non-blinded, multicenter superiority trial with 227 patients with  
39  
40 419 postoperative hospital stay as the primary endpoint. The study identified significant  
41  
42 420 differences regarding blood loss [150 ml (LAG) and 300 ml (OG),  $p < 0.001$ ] and  
43  
44 421 operating time [216 min (LAG) and 182 min (OG),  $p < 0.001$ ], but no significant  
45  
46 422 differences in hospital stay ( $p = 0.34$ ), postoperative complications [44% (LAG) and  
47  
48 423 42% (OG),  $p = 0.91$ ], in-hospital mortality [4% (LAG) and 7% (OG),  $p = 0.40$ ], R0  
49  
50 424 resections [95% (LAG) and 95% (OG),  $p = 1.00$ ], median lymph node yield [29 (LAG)  
51  
52 425 and 29 (OG),  $p = 0.49$ ], 1-year overall survival [76% (LAG) and 78% (OG),  $p = 0.74$ ],  
53  
54 426 and health-related quality of life [+1.5 (LAG) and +3.6 (OG) on a 1-100 scale].  
55  
56

57  
58 427 The STOMACH trial is an observer-blinded, multicenter, non-inferiority trial with 96  
59  
60 428 patients following neoadjuvant chemotherapy with quality of oncological resection

1  
2  
3 429 (radicality of surgery and number of retrieved lymph nodes) as the primary endpoint.  
4  
5 430 Mean number of resected lymph nodes [41.7±16.1 (LAG) and 43.4±17.3 (OG),  
6  
7 431 p=0.612), number of R0 resections (44/47 (LAG) and 48/49 (OG), p=0.617], 1-year  
8  
9 432 survival (85.5% (LAG) and 90.4% (OG), p=0.701], postoperative complications  
10  
11 433 [16/47 (LAG) and 21/49 (OG), p=0.408], and postoperative QoL [measured with  
12  
13 434 EQ5D, EORTC-QLQ-C30, and EORTC-QLQ-STO22] were not significantly different.  
14  
15  
16 435 In a regular setting with a diagnosed carcinoma, patients should usually be advised  
17  
18 436 to make their decision for or against a certain treatment option with regards to a  
19  
20 437 combination of highest expected overall survival and simultaneous conservation of  
21  
22 438 long-term QoL. Short-term postoperative complications should only be treated as  
23  
24 439 secondary deciding factors. However, if postoperative complications might impair  
25  
26 440 long-term QoL or even overall survival, they become equally relevant. In general,  
27  
28 441 postoperative complications can have negative effects on QoL or overall survival;  
29  
30 442 however, this is much more the case for gastric cancer, as time to continuation of  
31  
32 443 peroperative chemotherapy can be prolonged and the prognosis therefore worsened.  
33  
34 444 The STOMACH trial provides evidence that MIG is non-inferior to OG in terms of  
35  
36 445 oncologic quality of resection, which is a necessary requirement for the MEGA trial,  
37  
38 446 as postoperative morbidity and complications can only be decisive factors in the case  
39  
40 447 of oncological non-inferiority for an oncological resection with curative intent.  
41  
42 448 While both the STOMACH and LOGICA trials suggest that postoperative  
43  
44 449 complications might not be significantly different between both groups, a premature  
45  
46 450 confirmative statement must be avoided as complications have only been  
47  
48 451 investigated as secondary endpoints so far. Consequently, a multicenter RCT  
49  
50 452 comparing total MIG and OG for gastric cancer in terms of postoperative  
51  
52 453 complications is needed to decide whether MIG should be established as the new  
53  
54 454 standard treatment for resectable gastric cancer in Europe.  
55  
56  
57  
58  
59  
60

1  
2  
3 455 The MEGA trial has strict quality control measures and will be conducted in line with  
4  
5 456 all relevant guidelines. Therefore, it will provide the highest level of evidence on this  
6  
7 457 very relevant clinical research question.  
8  
9

10 458

### 11 459 **Ethics and dissemination**

12  
13  
14 460 The MEGA trial conforms to the Declaration of Helsinki [59]. The Independent Ethics  
15  
16 461 Committee of the Medical Faculty, University of Heidelberg, approved the MEGA trial  
17  
18 462 protocol (registration number S-816/2021). For other trial centers, recruitment will  
19  
20 463 only be initiated after receiving approval from their respective local ethics  
21  
22 464 committees. Study objectives and procedures will be communicated clearly to all  
23  
24 465 qualifying patients and written informed consent will be obtained from those who  
25  
26 466 agree to participate. Results will be presented at scientific meetings and published in  
27  
28 467 international peer-reviewed journals. Summaries will be provided to the funders of  
29  
30 468 the study and results will be published in open-access journals.  
31  
32  
33  
34

35 469

### 36 470 **Patient and Public Involvement**

37  
38 471 Patients are involved in the design and conduction of this trial. Priority of the research  
39  
40 472 question, outcome measures, and recruitment methods were discussed with patients  
41  
42 473 during the initial planning stage. Patients have stated an uneventful postoperative  
43  
44 474 course as a very notable feature, and every possible intervention contributing to  
45  
46 475 lower postoperative morbidity was rated to be of great importance.  
47  
48

49  
50 476 The chairman of one of Germany's largest patient self-aid groups concerning  
51  
52 477 minimally invasive surgery (SHG Frankfurt Sachsenhausen) will be a member of the  
53  
54 478 data safety and monitoring board as a patient representative. Therefore, this study  
55  
56 479 will continue to take the patient's perspective into account.  
57  
58  
59

60 480



1  
2  
3 481 **Modification of the protocol**  
4

5 482 The current protocol version (1.2) will be utilized during trial initiation. In case of  
6  
7 483 protocol amendments, these will be submitted to the relevant ethics committees for  
8  
9 484 approval.  
10  
11

12 485

13  
14 486 **Additional file**

15  
16  
17 487 Additional file 1: SPIRIT checklist.  
18

19 488

20  
21 489 **Abbreviations**  
22

|                  |                                                                                                             |
|------------------|-------------------------------------------------------------------------------------------------------------|
| ADLs             | Activities of daily living                                                                                  |
| AE               | Adverse event                                                                                               |
| AEG              | Adenocarcinoma of esophagogastric junction                                                                  |
| ASA              | American Society of Anesthesiologists Classification                                                        |
| BIS              | Body Image Scale                                                                                            |
| BMBF             | Federal Ministry of Education and Research                                                                  |
| CA               | Carbohydrate antigen                                                                                        |
| CEA              | Carcinoembryonic antigen                                                                                    |
| CCI              | Comprehensive Complication Index according to Clavien-Dindo classification                                  |
| eCRF             | Electronic Case Report Forms                                                                                |
| CRP              | C-reactive protein                                                                                          |
| DALY             | Disability-adjusted life years                                                                              |
| DRKS             | Deutsches Register Klinischer Studien (German Clinical Trials Register)                                     |
| DSMB             | Data Safety and Monitoring Board                                                                            |
| EORTC QLQ-C30    | European Organisation for Research and Treatment of Cancer Quality of Life Questionnaire Core 30            |
| EORTC QLQ-STO22  | European Organisation for Research and Treatment of Cancer Quality of Life Questionnaire for Gastric Cancer |
| EUROQOL EQ-5D-5L | EuroQol Group Questionnaire for Quality of Life with 5 dimensions and 5 levels                              |
| FPI              | First-patient-in                                                                                            |
| FU               | Follow-up                                                                                                   |
| GCP              | Good Clinical Practice                                                                                      |
| ICH              | International Council for Harmonisation of Technical Requirements for Pharmaceuticals for Human Use         |
| ICU              | Intermediate / intensive care unit                                                                          |
| IMBI             | Institute of Medical Biometry                                                                               |



|        |                                               |
|--------|-----------------------------------------------|
| ITT    | Intention-to-treat                            |
| LAG    | Laparoscopic gastrectomy                      |
| LPO    | Last-patient-out                              |
| MIG    | Minimally invasive gastrectomy                |
| OG     | Open gastrectomy                              |
| POD    | Postoperative day                             |
| POM    | Postoperative month                           |
| PRO    | Patient-reported outcome                      |
| QoL    | Quality of life                               |
| QoR-15 | Quality of Recovery 15 questionnaire          |
| RAG    | Robotic-assisted gastrectomy                  |
| RCT    | Randomized controlled trial                   |
| SAE    | Serious adverse event                         |
| SDGC   | Study Center of the German Society of Surgery |
| SDV    | Source data verification                      |
| SOP    | Standard operating procedure                  |
| V      | Visit                                         |

490

## 491 **Acknowledgements**

492 The authors gratefully acknowledge the Study Center of the German Society of  
 493 Surgery (SDGC) in the Department of General, Visceral, and Transplantation  
 494 Surgery at Heidelberg University Hospital for its assistance in coordinating this RCT.  
 495 We would also like to thank the other centers that have committed to participating in  
 496 the trial.

497

## 498 **Funding statement**

499 The MEGA trial is funded by the Federal Ministry of Education and Research  
 500 (BMBF), funding number 01KG2029. All trial aspects will be performed independently  
 501 from the funding source, including trial design and conduction, analysis, and  
 502 interpretation of data, as well as submission of the report for publication. The funder  
 503 does not have any influence in study design or collection, management, analysis,  
 504 and interpretation of data.

1  
2  
3 5054  
5 **506 Authors' contributions**

7 507 BPMS, FN and ASF developed the original concept of the trial and applied for  
8 funding. FN, ASF, DH, CK, MF, SZ and BPMS developed the design and  
9 methodology. BPMS and FN recruited all participating trial centers. FN, ASF, CK,  
10 MF, SZ and BPMS performed initial statistical steps to develop the analysis plan. FN,  
11 ASF, RK, SVA, ST, PP, AB and HN contributed to drafting the protocol. DH, CK, MF,  
12 SZ, BB, FB, CB, IG, SG, PG, CG, JH, KL, LM, SM, DR, FS, DS, PP, TS and BPMS  
13 contributed to the revision of the final protocol. All authors have read and approved of  
14 the final manuscript.  
15  
16  
17  
18  
19  
20  
21  
22  
23  
24  
25  
26  
27  
28  
29  
30

31 **517 Responsibilities**

32 Prof. Dr. Müller-Stich, Coordinating Investigator, is involved in every aspect of the  
33 trial and has ultimate authority over study design, data collection, interpretation of  
34 data, and oversight of the intermittent and final written reports. PD Dr. Nickel, MME,  
35 is Deputy Coordinating Investigator. Alexander Studier-Fischer, MD, is Trial  
36 Organizer. The Clinical Trial Committee consists of the Coordinating Investigator, the  
37 Deputy Coordinating Investigator, and the Trial Organizer, originating from the  
38 Division of Minimally Invasive and Robotic-assisted Surgery in the Department of  
39 General, Visceral, and Transplantation Surgery at Heidelberg University Hospital. To  
40 ensure objectivity, the third-party Institute of Medical Biometry (IMBI) is responsible  
41 for data management, statistical planning, and analysis. Project management and  
42 monitoring are handled by the SDGC (Study Center of the German Society of  
43 Surgery), in Heidelberg. Additionally, a Data Safety and Monitoring Board (DSMB)  
44 consisting of independent experts will advise on the continuation, modification, or  
45  
46  
47  
48  
49  
50  
51  
52  
53  
54  
55  
56  
57  
58  
59  
60

1  
2  
3 531 termination of the trial and a steering committee will supervise the conduction of the  
4  
5 532 trial and make decisions based on DSMB recommendations.  
6  
7

8 533

9  
10 534 **Data availability**

11  
12 535 The full protocol, participant-level dataset, and statistical code will be made available  
13  
14 536 by the corresponding authors upon reasonable request.  
15  
16

17 537

18  
19 538 **Conflict of interest statements**

20  
21 539 The authors declare that they have no conflicts of interest or relevant financial ties to  
22  
23 540 disclose. Felix Nickel reports support for courses and travel from Johnson and  
24  
25 541 Johnson, Medtronic, Intuitive Surgical, Cambridge Medical Robotics, and KARL  
26  
27 542 STORZ as well as consultancy fees from KARL STORZ.  
28  
29

30 543

31  
32  
33 544 **References**

- 34  
35 545 1. Bray, F., et al., *Global cancer statistics 2018: GLOBOCAN estimates of*  
36  
37 546 *incidence and mortality worldwide for 36 cancers in 185 countries*. CA Cancer J Clin,  
38  
39 547 2018. **68**(6): p. 394-424.  
40  
41 548 2. Soerjomataram, I., et al., *Global burden of cancer in 2008: a systematic*  
42  
43 549 *analysis of disability-adjusted life-years in 12 world regions*. Lancet, 2012. **380**(9856):  
44  
45 550 p. 1840-50.  
46  
47 551 3. Fitzmaurice, C., et al., *Global, Regional, and National Cancer Incidence,*  
48  
49 552 *Mortality, Years of Life Lost, Years Lived With Disability, and Disability-Adjusted Life-*  
50  
51 553 *years for 32 Cancer Groups, 1990 to 2015: A Systematic Analysis for the Global*  
52  
53 554 *Burden of Disease Study*. JAMA Oncol, 2017. **3**(4): p. 524-548.  
54  
55 555 4. Selby, L.V., et al., *Morbidity after Total Gastrectomy: Analysis of 238 Patients*.  
56  
57 556 Journal of the American College of Surgeons, 2015. **220**(5): p. 863-871.e2.  
58  
59  
60

- 1  
2  
3 557 5. Karimi, P., et al., *Gastric cancer: descriptive epidemiology, risk factors,*  
4  
5 558 *screening, and prevention.* *Cancer Epidemiol Biomarkers Prev*, 2014. **23**(5): p. 700-  
6  
7 559 13.  
8  
9  
10 560 6. Van Cutsem, E., et al., *Gastric cancer.* *Lancet*, 2016. **388**(10060): p. 2654-  
11  
12 561 2664.  
13  
14 562 7. Kim, W., et al., *Decreased Morbidity of Laparoscopic Distal Gastrectomy*  
15  
16 563 *Compared With Open Distal Gastrectomy for Stage I Gastric Cancer: Short-term*  
17  
18 564 *Outcomes From a Multicenter Randomized Controlled Trial (KLASS-01).* *Ann Surg*,  
19  
20 565 2016. **263**(1): p. 28-35.  
21  
22  
23 566 8. Fuchs, H., et al., *Operative Fallzahlen beeinflussen die Mortalität nach*  
24  
25 567 *Gastrektomie erheblich – eine Analyse des U.S. Nationwide Inpatient Sample.*  
26  
27  
28 568 9. Pacelli, F., et al., *Four hundred consecutive total gastrectomies for gastric*  
29  
30 569 *cancer: a single-institution experience.* *Arch Surg*, 2008. **143**(8): p. 769-75;  
31  
32 570 discussion 775.  
33  
34  
35 571 10. Bartlett, E.K., et al., *Morbidity and mortality after total gastrectomy for gastric*  
36  
37 572 *malignancy using the American College of Surgeons National Surgical Quality*  
38  
39 573 *Improvement Program database.* *Surgery*, 2014. **156**(2): p. 298-304.  
40  
41  
42 574 11. Papenfuss, W.A., et al., *Morbidity and mortality associated with gastrectomy*  
43  
44 575 *for gastric cancer.* *Ann Surg Oncol*, 2014. **21**(9): p. 3008-14.  
45  
46  
47 576 12. Dhir, M., et al., *A preoperative nomogram to predict the risk of perioperative*  
48  
49 577 *mortality following gastric resections for malignancy.* *J Gastrointest Surg*, 2012.  
50  
51 578 **16**(11): p. 2026-36.  
52  
53  
54 579 13. Edwards, P., et al., *Prospective comparison of D1 vs modified D2 gastrectomy*  
55  
56 580 *for carcinoma.* *Br J Cancer*, 2004. **90**(10): p. 1888-92.  
57  
58  
59  
60

- 1  
2  
3 581 14. Finlayson, E.V., P.P. Goodney, and J.D. Birkmeyer, *Hospital volume and*  
4  
5 582 *operative mortality in cancer surgery: a national study*. Arch Surg, 2003. **138**(7): p.  
6  
7 583 721-5; discussion 726.
- 8  
9  
10 584 15. Smith, J.W., et al., *Morbidity of radical lymphadenectomy in the curative*  
11  
12 585 *resection of gastric carcinoma*. Arch Surg, 1991. **126**(12): p. 1469-73.
- 13  
14 586 16. Harrison, L.E., M.S. Karpeh, and M.F. Brennan, *Proximal gastric cancers*  
15  
16 587 *resected via a transabdominal-only approach. Results and comparisons to distal*  
17  
18 588 *adenocarcinoma of the stomach*. Ann Surg, 1997. **225**(6): p. 678-83; discussion 683-  
19  
20 589 5.
- 21  
22  
23 590 17. Noguchi, Y., et al., *Is gastric carcinoma different between Japan and the*  
24  
25 591 *United States?* Cancer, 2000. **89**(11): p. 2237-46.
- 26  
27  
28 592 18. Li, H.Z., et al., *Laparoscopic-assisted versus open radical gastrectomy for*  
29  
30 593 *resectable gastric cancer: Systematic review, meta-analysis, and trial sequential*  
31  
32 594 *analysis of randomized controlled trials*. J Surg Oncol, 2016. **113**(7): p. 756-67.
- 33  
34  
35 595 19. Yamada, H., et al., *Effect of obesity on technical feasibility and postoperative*  
36  
37 596 *outcomes of laparoscopy-assisted distal gastrectomy--comparison with open distal*  
38  
39 597 *gastrectomy*. J Gastrointest Surg, 2008. **12**(6): p. 997-1004.
- 40  
41  
42 598 20. Lacy, A.M., et al., *Laparoscopy-assisted colectomy versus open colectomy for*  
43  
44 599 *treatment of non-metastatic colon cancer: a randomised trial*. Lancet, 2002.  
45  
46 600 **359**(9325): p. 2224-9.
- 47  
48  
49 601 21. van der Pas, M.H., et al., *Laparoscopic versus open surgery for rectal cancer*  
50  
51 602 *(COLOR II): short-term outcomes of a randomised, phase 3 trial*. Lancet Oncol, 2013.  
52  
53 603 **14**(3): p. 210-8.
- 54  
55  
56 604 22. Müller-Stich, B.P., et al., *Meta-analysis of randomized controlled trials and*  
57  
58 605 *individual patient data comparing minimally invasive with open oesophagectomy for*  
59  
60 606 *cancer*. British Journal of Surgery, 2021.

- 1  
2  
3 607 23. Lee, H.J., et al., *Short-term Outcomes of a Multicenter Randomized Controlled*  
4  
5 608 *Trial Comparing Laparoscopic Distal Gastrectomy With D2 Lymphadenectomy to*  
6  
7 609 *Open Distal Gastrectomy for Locally Advanced Gastric Cancer (KLASS-02-RCT).*  
8  
9 610 *Ann Surg*, 2019. **270**(6): p. 983-991.
- 11  
12 611 24. Jaschinski, T., et al., *Laparoscopic versus open surgery for suspected*  
13  
14 612 *appendicitis.* *Cochrane Database Syst Rev*, 2018. **11**(11): p. Cd001546.
- 16  
17 613 25. Law, W.L., et al., *The Impact of Postoperative Complications on Long-Term*  
18  
19 614 *Outcomes Following Curative Resection for Colorectal Cancer.* *Annals of Surgical*  
20  
21 615 *Oncology*, 2007. **14**(9): p. 2559-2566.
- 23  
24 616 26. Chok, K.S., et al., *Impact of postoperative complications on long-term outcome*  
25  
26 617 *of curative resection for hepatocellular carcinoma.* *British Journal of Surgery*, 2008.  
27  
28 618 **96**(1): p. 81-87.
- 30  
31 619 27. Kamphues, C., et al., *Postoperative Complications Deteriorate Long-Term*  
32  
33 620 *Outcome in Pancreatic Cancer Patients.* *Annals of Surgical Oncology*, 2012. **19**(3): p.  
34  
35 621 856-863.
- 37  
38 622 28. Li, Q.-G., et al., *Impact of postoperative complications on long-term survival*  
39  
40 623 *after radical resection for gastric cancer.* *World journal of gastroenterology*, 2013.  
41  
42 624 **19**(25): p. 4060-4065.
- 44  
45 625 29. *DRKS Trial document. Accessed 8th of April 2020.*  
46  
47 626 [https://www.drks.de/drks\\_web/navigate.do?navigationId=trial.HTML&TRIAL\\_ID=DRK](https://www.drks.de/drks_web/navigate.do?navigationId=trial.HTML&TRIAL_ID=DRK)  
48  
49 627 [S00016773](https://www.drks.de/drks_web/navigate.do?navigationId=trial.HTML&TRIAL_ID=DRK).
- 51  
52 628 30. Chan, A.W., et al., *SPIRIT 2013 Statement: defining standard protocol items*  
53  
54 629 *for clinical trials.* *Rev Panam Salud Publica*, 2015. **38**(6): p. 506-14.
- 56  
57 630 31. Slankamenac, K., et al., *The Comprehensive Complication Index: A Novel and*  
58  
59 631 *More Sensitive Endpoint for Assessing Outcome and Reducing Sample Size in*  
60  
632 *Randomized Controlled Trials.* *Annals of Surgery*, 2014. **260**(5): p. 757-763.

- 1  
2  
3 633 32. Slankamenac, K., et al., *The comprehensive complication index: a novel*  
4  
5 634 *continuous scale to measure surgical morbidity*. *Ann Surg*, 2013. **258**(1): p. 1-7.  
6  
7 635 33. Nickel, F., et al., *Minimally Invasive Versus open AbdominoThoracic*  
8  
9 636 *Esophagectomy for esophageal carcinoma (MIVATE) - study protocol for a*  
10  
11 637 *randomized controlled trial DRKS00016773*. *Trials*, 2021. **22**(1): p. 41.  
12  
13 638 34. Dindo, D., N. Demartines, and P.-A. Clavien, *Classification of surgical*  
14  
15 639 *complications: a new proposal with evaluation in a cohort of 6336 patients and*  
16  
17 640 *results of a survey*. *Annals of surgery*, 2004. **240**(2): p. 205-213.  
18  
19 641 35. Japanese Gastric Cancer, A., *Japanese classification of gastric carcinoma:*  
20  
21 642 *3rd English edition*. *Gastric Cancer*, 2011. **14**(2): p. 101-112.  
22  
23 643 36. Ma, G., et al., *Comparison of the short-term clinical outcome between open*  
24  
25 644 *and minimally invasive esophagectomy by comprehensive complication index*. *J*  
26  
27 645 *Cancer Res Ther*, 2018. **14**(4): p. 789-794.  
28  
29 646 37. Huscher, C.G., et al., *Laparoscopic versus open subtotal gastrectomy for*  
30  
31 647 *distal gastric cancer: five-year results of a randomized prospective trial*. *Ann Surg*,  
32  
33 648 2005. **241**(2): p. 232-7.  
34  
35 649 38. Cai, J., et al., *A prospective randomized study comparing open versus*  
36  
37 650 *laparoscopy-assisted D2 radical gastrectomy in advanced gastric cancer*. *Dig Surg*,  
38  
39 651 2011. **28**(5-6): p. 331-7.  
40  
41 652 39. Cui, M., et al., *A prospective randomized clinical trial comparing D2 dissection*  
42  
43 653 *in laparoscopic and open gastrectomy for gastric cancer*. *Med Oncol*, 2015. **32**(10):  
44  
45 654 p. 241.  
46  
47 655 40. Kitano, S., et al., *A randomized controlled trial comparing open vs*  
48  
49 656 *laparoscopy-assisted distal gastrectomy for the treatment of early gastric cancer: an*  
50  
51 657 *interim report*. *Surgery*, 2002. **131**(1 Suppl): p. S306-11.  
52  
53  
54  
55  
56  
57  
58  
59  
60



- 1  
2  
3 658 41. Lee, J.H., H.S. Han, and J.H. Lee, *A prospective randomized study comparing*  
4  
5 659 *open vs laparoscopy-assisted distal gastrectomy in early gastric cancer: early results.*  
6  
7 660 *Surg Endosc*, 2005. **19**(2): p. 168-73.
- 8  
9  
10 661 42. Jiang, L., et al., *Laparoscopy-assisted gastrectomy versus open gastrectomy*  
11  
12 662 *for resectable gastric cancer: an update meta-analysis based on randomized*  
13  
14 663 *controlled trials.* *Surg Endosc*, 2013. **27**(7): p. 2466-80.
- 15  
16  
17 664 43. Kim, H.H., et al., *Prospective randomized controlled trial (phase III) to*  
18  
19 665 *comparing laparoscopic distal gastrectomy with open distal gastrectomy for gastric*  
20  
21 666 *adenocarcinoma (KLASS 01).* *J Korean Surg Soc*, 2013. **84**(2): p. 123-30.
- 22  
23  
24 667 44. Kim, Y.W., et al., *Long-term outcomes of laparoscopy-assisted distal*  
25  
26 668 *gastrectomy for early gastric cancer: result of a randomized controlled trial (COACT*  
27  
28 669 *0301).* *Surg Endosc*, 2013. **27**(11): p. 4267-76.
- 29  
30  
31 670 45. Yamashita, K., et al., *Laparoscopic versus open distal gastrectomy for early*  
32  
33 671 *gastric cancer in Japan: long-term clinical outcomes of a randomized clinical trial.*  
34  
35 672 *Surg Today*, 2016. **46**(6): p. 741-9.
- 36  
37  
38 673 46. Hyung, W.J., et al., *A feasibility study of laparoscopic total gastrectomy for*  
39  
40 674 *clinical stage I gastric cancer: a prospective multi-center phase II clinical trial, KLASS*  
41  
42 675 *03.* *Gastric Cancer*, 2019. **22**(1): p. 214-222.
- 43  
44  
45 676 47. Takiguchi, S., et al., *Laparoscopy-assisted distal gastrectomy versus open*  
46  
47 677 *distal gastrectomy. A prospective randomized single-blind study.* *World J Surg*, 2013.  
48  
49 678 **37**(10): p. 2379-86.
- 50  
51  
52 679 48. Wang, Z., et al., *Short-term surgical outcomes of laparoscopy-assisted versus*  
53  
54 680 *open D2 distal gastrectomy for locally advanced gastric cancer in North China: a*  
55  
56 681 *multicenter randomized controlled trial.* *Surg Endosc*, 2019. **33**(1): p. 33-45.
- 57  
58  
59  
60



- 1  
2  
3 682 49. Hu, Y., et al., *Morbidity and Mortality of Laparoscopic Versus Open D2 Distal*  
4  
5 683 *Gastrectomy for Advanced Gastric Cancer: A Randomized Controlled Trial*. J Clin  
6  
7 684 *Oncol*, 2016. **34**(12): p. 1350-7.
- 8  
9  
10 685 50. Hayashi, H., et al., *Prospective randomized study of open versus laparoscopy-*  
11  
12 686 *assisted distal gastrectomy with extraperigastric lymph node dissection for early*  
13  
14 687 *gastric cancer*. *Surg Endosc*, 2005. **19**(9): p. 1172-6.
- 15  
16  
17 688 51. Straatman, J., et al., *Surgical techniques, open versus minimally invasive*  
18  
19 689 *gastrectomy after chemotherapy (STOMACH trial): study protocol for a randomized*  
20  
21 690 *controlled trial*. *Trials*, 2015. **16**: p. 123.
- 22  
23  
24 691 52. Haverkamp, L., et al., *Laparoscopic versus open gastrectomy for gastric*  
25  
26 692 *cancer, a multicenter prospectively randomized controlled trial (LOGICA-trial)*. *BMC*  
27  
28 693 *Cancer*, 2015. **15**: p. 556.
- 29  
30  
31 694 53. van der Veen, A., et al., *Laparoscopic Versus Open Gastrectomy for Gastric*  
32  
33 695 *Cancer (LOGICA): A Multicenter Randomized Clinical Trial*. *J Clin Oncol*, 2021.  
34  
35 696 **39**(9): p. 978-989.
- 36  
37  
38 697 54. van der Wielen, N., et al., *Open versus minimally invasive total gastrectomy*  
39  
40 698 *after neoadjuvant chemotherapy: results of a European randomized trial*. *Gastric*  
41  
42 699 *Cancer*, 2021. **24**(1): p. 258-271.
- 43  
44  
45 700 55. van der Wielen, N., et al., *Health related quality of life following open versus*  
46  
47 701 *minimally invasive total gastrectomy for cancer: Results from a randomized clinical*  
48  
49 702 *trial*. *Eur J Surg Oncol*, 2021.
- 50  
51  
52 703 56. Wang, G., et al., *Assessing the safety and efficacy of full robotic gastrectomy*  
53  
54 704 *with intracorporeal robot-sewn anastomosis for gastric cancer: A randomized clinical*  
55  
56 705 *trial*. *J Surg Oncol*, 2016. **113**(4): p. 397-404.
- 57  
58  
59  
60

1  
2  
3 706 57. Ojima, T., et al., *Robotic versus laparoscopic gastrectomy with lymph node*  
4  
5 707 *dissection for gastric cancer: study protocol for a randomized controlled trial*. *Trials*,  
6  
7 708 2018. **19**(1): p. 409.

8  
9  
10 709 58. Memon, M.A. and B. Memon, *Laparoscopic D2 distal gastrectomy for*  
11  
12 710 *advanced gastric cancer: a myth or a reality?* *Transl Gastroenterol Hepatol*, 2016. **1**:  
13  
14 711 p. 39.

15  
16 712 59. Association, W.M., *World Medical Association Declaration of Helsinki: Ethical*  
17  
18 713 *Principles for Medical Research Involving Human Subjects*. *JAMA*, 2013. **310**(20): p.  
19  
20 714 2191-2194.

21  
22  
23 715

24  
25 716

26  
27  
28 717 **Figure 1 | Trial design flow chart.** \* Intraoperative conversion from MIG to OG, e.g.,  
29  
30 718 due to bleeding. \*\* Lost to follow-up over 30 postoperative days. Postoperative day  
31  
32 719 (POD), postoperative month (POM), intention-to-treat (ITT), per-protocol (PP).

33  
34  
35 720

36  
37 721 **Figure 2 | Schematic lymphadenectomy.** Stations for lymphadenectomy (LAD) as  
38  
39 722 required for total gastrectomy according to the cited Japanese classification.  
40  
41 723 Schemes are separated into D1 LAD, D2 LAD, and further lymph node stations.

42  
43  
44 724

45  
46  
47 725

48  
49  
50  
51  
52  
53  
54  
55  
56  
57  
58  
59  
60

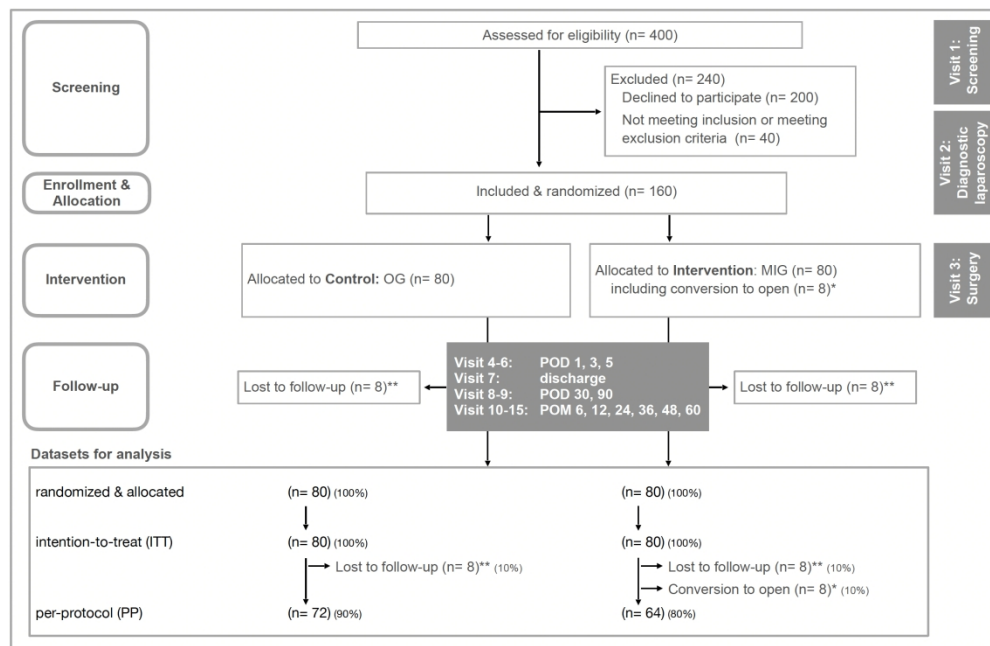

Figure 1 | Trial design flow chart. \* Intraoperative conversion from MIG to OG, e.g., due to bleeding. \*\* Lost to follow-up over 30 postoperative days. Postoperative day (POD), postoperative month (POM), intention-to-treat (ITT), per-protocol (PP).

473x306mm (144 x 144 DPI)

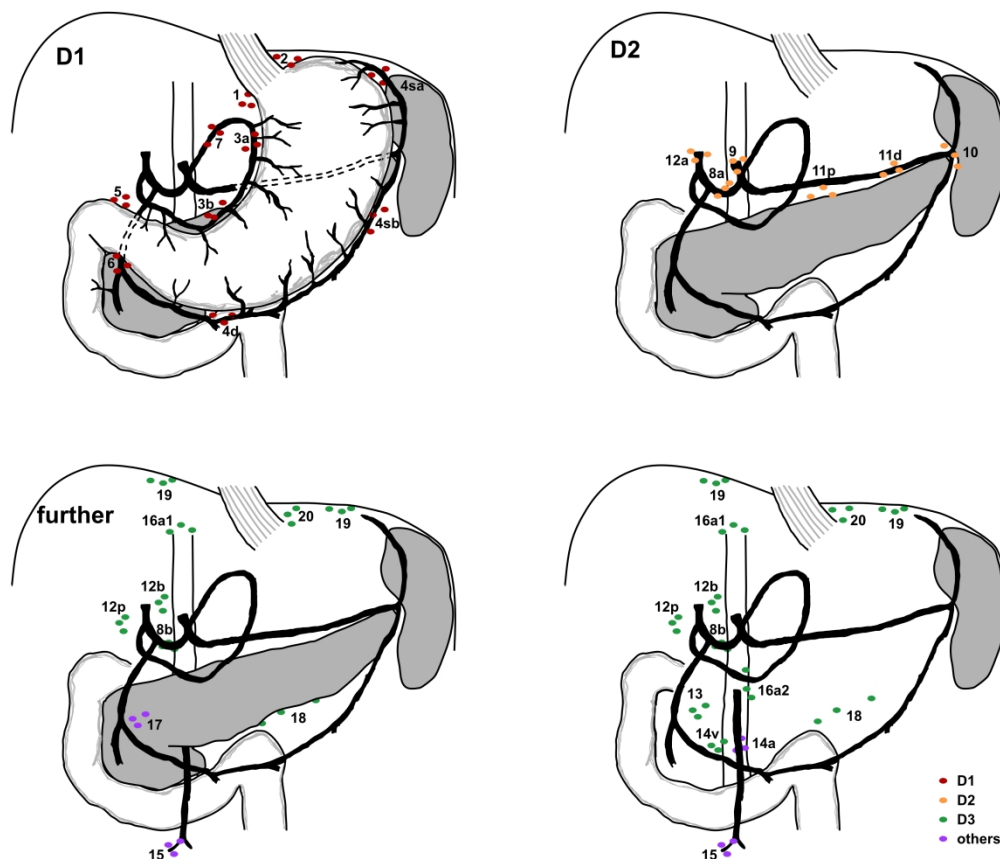

Figure 2 | Schematic lymphadenectomy. Stations for lymphadenectomy (LAD) as required for total gastrectomy according to the cited Japanese classification. Schemes are separated into D1 LAD, D2 LAD, and further lymph node stations.

750x636mm (118 x 118 DPI)

## 1 Appendices

### 3 Appendix 1: ECOG & KARNOFSKY Performance Status

| ECOG PERFORMANCE STATUS* ** |                                                                                                                                                           | KARNOFSKY PERFORMANCE STATUS*** |                                                                               |
|-----------------------------|-----------------------------------------------------------------------------------------------------------------------------------------------------------|---------------------------------|-------------------------------------------------------------------------------|
| GRADE                       | Description                                                                                                                                               | GRADE                           | Description                                                                   |
| 0                           | Fully active, able to carry on all pre-disease performance without restriction                                                                            | 100                             | Normal, no complaints; no evidence of disease                                 |
|                             |                                                                                                                                                           | 90                              | Able to carry on normal activity; minor signs or symptoms of disease          |
| 1                           | Restricted in physically strenuous activity but ambulatory and able to carry out work of a light or sedentary nature, e.g., light house work, office work | 80                              | Normal activity with effort, some signs or symptoms of disease                |
|                             |                                                                                                                                                           | 70                              | Cares for self but unable to carry on normal activity or to do active work    |
| 2                           | Ambulatory and capable of all selfcare but unable to carry out any work activities; up and about more than 50% of waking hours                            | 60                              | Requires occasional assistance but is able to care for most of personal needs |
|                             |                                                                                                                                                           | 50                              | Requires considerable assistance and frequent medical care                    |
| 3                           | Capable of only limited selfcare; confined to bed or chair more than 50% of waking hours                                                                  | 40                              | Disabled; requires special care and assistance                                |
|                             |                                                                                                                                                           | 30                              | Severely disabled; hospitalization is indicated although death not imminent   |
| 4                           | Completely disabled; cannot carry on any selfcare; totally confined to bed or chair                                                                       | 20                              | Very ill; hospitalization and active supportive care necessary                |
|                             |                                                                                                                                                           | 10                              | Moribund                                                                      |
| 5                           | Dead                                                                                                                                                      | 0                               | Dead                                                                          |

\*Zubrod C, et al. Appraisal of methods for the study of chemotherapy in man: Comparative therapeutic trial of nitrogen mustard and thiophosphoramide. *Journal of Chronic Diseases*; 1960:11:7-33.

\*\*Oken M, Creech R, Tormey D, et al. Toxicity and response criteria of the Eastern Cooperative Oncology Group. *Am J Clin Oncol*. 1982;5:649-655.

\*\*\*Karnofsky D, Burchenal J, The clinical evaluation of chemotherapeutic agents in cancer. In: MacLeod C, ed. *Evaluation of Chemotherapeutic Agents*. New York, NY: Columbia University Press; 1949:191-205.

<https://ecog-acrin.org/resources/ecog-performance-status>

13 **Appendix 2: Documentation of lymphadenectomy during total gastrectomy**

| Japanese classification of gastric carcinoma: 3rd English edition Gastric Cancer (2011) 14:101–112 |                                                      |                                                                                                                                                                                                                                        | D2 Lymphadenectomy completed lymphadenectomy = <input type="checkbox"/> |
|----------------------------------------------------------------------------------------------------|------------------------------------------------------|----------------------------------------------------------------------------------------------------------------------------------------------------------------------------------------------------------------------------------------|-------------------------------------------------------------------------|
| No.                                                                                                | Location                                             |                                                                                                                                                                                                                                        |                                                                         |
| 1*                                                                                                 | Right paracardial                                    | Right paracardial LNs, including those along the first branch of the ascending limb of the left gastric artery.                                                                                                                        | <input type="checkbox"/>                                                |
| 2*                                                                                                 | Left paracardial                                     | Left paracardial LNs including those along the esophagocardiac branch of the left subphrenic artery                                                                                                                                    | <input type="checkbox"/>                                                |
| 3a*                                                                                                | Left gastric vessel                                  | Lesser curvature LNs along the branches of the left gastric artery                                                                                                                                                                     | <input type="checkbox"/>                                                |
| 3b*                                                                                                | Right gastric vessel                                 | Lesser curvature LNs along the 2nd branch and distal part of the right gastric artery                                                                                                                                                  | <input type="checkbox"/>                                                |
| 4sa*                                                                                               | Short gastric vessel                                 | Left greater curvature LNs along the short gastric arteries (perigastric area)                                                                                                                                                         | <input type="checkbox"/>                                                |
| 4sb*                                                                                               | Left gastroepiploic                                  | Left greater curvature LNs along the left gastroepiploic artery (perigastric area)                                                                                                                                                     | <input type="checkbox"/>                                                |
| 4d*                                                                                                | Right gastroepiploic                                 | Right greater curvature LNs along the 2nd branch and distal part of the right gastroepiploic artery                                                                                                                                    | <input type="checkbox"/>                                                |
| 5*                                                                                                 | Suprapyloric                                         | Suprapyloric LNs along the 1st branch and proximal part of the right gastric artery                                                                                                                                                    | <input type="checkbox"/>                                                |
| 6*                                                                                                 | Infrapyloric                                         | Infrapyloric LNs along the first branch and proximal part of the right gastroepiploic artery down to the confluence of the right gastroepiploic vein and the anterior superior pancreaticoduodenal vein                                | <input type="checkbox"/>                                                |
| 7*                                                                                                 | Left gastric artery                                  | LNs along the trunk of left gastric artery between its root and the origin of its ascending branch                                                                                                                                     | <input type="checkbox"/>                                                |
| 8a**                                                                                               | Common hepatic artery                                | Anterosuperior LNs along the common hepatic artery                                                                                                                                                                                     | <input type="checkbox"/>                                                |
| 8b                                                                                                 | Common hepatic artery                                | Posterior LNs along the common hepatic artery                                                                                                                                                                                          | <input type="checkbox"/>                                                |
| 9**                                                                                                | Celiac artery                                        | Celiac artery LNs                                                                                                                                                                                                                      | <input type="checkbox"/>                                                |
| 10**                                                                                               | Splenic hilum                                        | Splenic hilar LNs including those adjacent to the splenic artery distal to the pancreatic tail, and those on the roots of the short gastric arteries and those along the left gastroepiploic artery proximal to its 1st gastric branch | ( <input type="checkbox"/> )                                            |
| 11p**                                                                                              | Proximal splenic artery                              | Proximal splenic artery LNs from its origin to halfway between its origin and the pancreatic tail end                                                                                                                                  | <input type="checkbox"/>                                                |
| 11d**                                                                                              | Distal splenic artery                                | Distal splenic artery LNs from halfway between its origin and the pancreatic tail end to the end of the pancreatic tail                                                                                                                | <input type="checkbox"/>                                                |
| 12a**                                                                                              | Hepatoduodenal ligament along the hepatic artery     | Hepatoduodenal ligament LNs along the proper hepatic artery, in the caudal half between the confluence of the right and left hepatic ducts and the upper border of the pancreas                                                        | <input type="checkbox"/>                                                |
| 12b                                                                                                | Hepatoduodenal ligament along the bile duct          | Hepatoduodenal ligament LNs along the bile duct, in the caudal half between the confluence of the right and left hepatic ducts and the upper border of the pancreas                                                                    | <input type="checkbox"/>                                                |
| 12p                                                                                                | Hepatoduodenal ligament along behind the portal vein | Hepatoduodenal ligament LNs along the portal vein in the caudal half between the confluence of the right and left hepatic ducts and the upper border of the pancreas                                                                   | <input type="checkbox"/>                                                |
| 13                                                                                                 | Posterior surface of pancreatic head                 | LNs on the posterior surface of the pancreatic head cranial to the duodenal papilla                                                                                                                                                    | <input type="checkbox"/>                                                |
| 14v                                                                                                | Superior mesenteric vein                             | LNs along the superior mesenteric vein                                                                                                                                                                                                 | <input type="checkbox"/>                                                |
| 14a                                                                                                | Superior mesenteric artery                           | -                                                                                                                                                                                                                                      | <input type="checkbox"/>                                                |
| 15                                                                                                 | Middle colic vessels                                 | LNs along the middle colic vessels                                                                                                                                                                                                     | <input type="checkbox"/>                                                |
| 16a1                                                                                               | Aortic hiatus                                        | Paraaortic LNs in the diaphragmatic aortic hiatus                                                                                                                                                                                      | <input type="checkbox"/>                                                |
| 16a2                                                                                               | Abdominal aorta (celiac trunk to left renal vein)    | Paraaortic LNs between the upper margin of the origin of the celiac artery and the lower border of the left renal vein                                                                                                                 | <input type="checkbox"/>                                                |
| 16b1                                                                                               | Abdominal aorta (left renal vein to IMA)             | Paraaortic LNs between the lower border of the left renal vein and the upper border of the origin of the inferior mesenteric artery                                                                                                    | <input type="checkbox"/>                                                |
| 16b2                                                                                               | Abdominal aorta (IMA to aortic bifurcation)          | Paraaortic LNs between the upper border of the origin of the inferior mesenteric artery and the aortic bifurcation                                                                                                                     | <input type="checkbox"/>                                                |
| 17                                                                                                 | Anterior surface of pancreatic head                  | LNs on the anterior surface of the pancreatic head beneath the pancreatic sheath                                                                                                                                                       | <input type="checkbox"/>                                                |
| 18                                                                                                 | Inferior margin of pancreas                          | LNs along the inferior border of the pancreatic body                                                                                                                                                                                   | <input type="checkbox"/>                                                |
| 19                                                                                                 | Infradiaphragmatic                                   | Infradiaphragmatic LNs predominantly along the subphrenic artery                                                                                                                                                                       | <input type="checkbox"/>                                                |
| 20                                                                                                 | Esophageal hiatus of the diaphragm                   | Paraesophageal LNs in the diaphragmatic esophageal hiatus                                                                                                                                                                              | <input type="checkbox"/>                                                |
| 110                                                                                                | Paraesophageal lower thorax                          | Paraesophageal LNs in the lower thorax                                                                                                                                                                                                 | <input type="checkbox"/>                                                |
| 111                                                                                                | Supradiaphragmatic                                   | Supradiaphragmatic LNs separate from the esophagus                                                                                                                                                                                     | <input type="checkbox"/>                                                |
| 112                                                                                                | Posterior mediastinal                                | Posterior mediastinal LNs separate from the esophagus and the esophageal hiatus                                                                                                                                                        | <input type="checkbox"/>                                                |

\*required for D1 lymphadenectomy

\*\*required for D2 lymphadenectomy

|                          |                                             |
|--------------------------|---------------------------------------------|
| <input type="checkbox"/> | Not required for MEGA trial                 |
| <input type="checkbox"/> | Optional for MEGA trial                     |
| <input type="checkbox"/> | Required for MEGA trial; if not explain why |

### Appendix 3: Katz Activities of Daily Living

| Activities<br>Points (1 or 0) | <b>Independence<br/>(1 Point)</b><br>NO supervision, direction or personal assistance.                                               | <b>Dependence<br/>(0 Points)</b><br>WITH supervision, direction, personal assistance or total care.                    |
|-------------------------------|--------------------------------------------------------------------------------------------------------------------------------------|------------------------------------------------------------------------------------------------------------------------|
| BATHING<br>Points: _____      | Bathes self completely or needs help in bathing only a single part of the body such as the back, genital area or disabled extremity. | Need help with bathing more than one part of the body, getting in or out of the tub or shower. Requires total bathing. |
| DRESSING<br>Points: _____     | Get clothes from closets and drawers and puts on clothes and outer garments complete with fasteners. May have help tying shoes.      | Needs help with dressing self or needs to be completely dressed.                                                       |
| TOILETING<br>Points: _____    | Goes to toilet, gets on and off, arranges clothes, cleans genital area without help.                                                 | Needs help transferring to the toilet, cleaning self or uses bedpan or commode.                                        |
| TRANSFERRING<br>Points: _____ | Moves in and out of bed or chair unassisted. Mechanical transfer aids are acceptable                                                 | Needs help in moving from bed to chair or requires a complete transfer.                                                |
| CONTINENCE<br>Points: _____   | Exercises complete self control over urination and defecation.                                                                       | Is partially or totally incontinent of bowel or bladder.                                                               |
| FEEDING<br>Points: _____      | Gets food from plate into mouth without help. Preparation of food may be done by another person.                                     | Needs partial or total help with feeding or requires parenteral feeding.                                               |

### Appendix 4: Clavien-Dindo-Classification

[https://www.assessurgery.com/about\\_cci-calculator/](https://www.assessurgery.com/about_cci-calculator/)

Dindo D, Demartines N, Clavien PA. Classification of surgical complications: a new proposal with evaluation in a cohort of 6336 patients and results of a survey. Ann Surg 2004; 240(2):205-213.

| Grades     | Definition                                                                                                                                                                                                                                                                                                                                                   |
|------------|--------------------------------------------------------------------------------------------------------------------------------------------------------------------------------------------------------------------------------------------------------------------------------------------------------------------------------------------------------------|
| <b>I</b>   | Any deviation from the normal postoperative course without the need for pharmacological treatment or surgical, endoscopic and radiological interventions<br>Allowed therapeutic regimens are: drugs as antiemetics, antipyretics, analgetics, diuretics and electrolytes and physiotherapy. This grade also includes wound infections opened at the bedside. |
| <b>II</b>  | Requiring pharmacological treatment with drugs other than such allowed for grade I complications.<br>Blood transfusions and total parenteral nutrition are also included.                                                                                                                                                                                    |
| <b>III</b> | Requiring surgical, endoscopic or radiological intervention                                                                                                                                                                                                                                                                                                  |
|            | <b>IIIa</b> Intervention not under general anesthesia                                                                                                                                                                                                                                                                                                        |
|            | <b>IIIb</b> Intervention under general anesthesia                                                                                                                                                                                                                                                                                                            |
| <b>IV</b>  | Life-threatening complication (including CNS complications)* requiring IC/ICU-management                                                                                                                                                                                                                                                                     |
|            | <b>IVa</b> single organ dysfunction (including dialysis)                                                                                                                                                                                                                                                                                                     |
|            | <b>IVb</b> multiorgan dysfunction                                                                                                                                                                                                                                                                                                                            |
| <b>V</b>   | Death of a patient                                                                                                                                                                                                                                                                                                                                           |

\*brain hemorrhage, ischemic stroke, subarachnoidal bleeding, but excluding transient ischemic attacks (TIA); IC: Intermediate care; ICU: Intensive care unit.

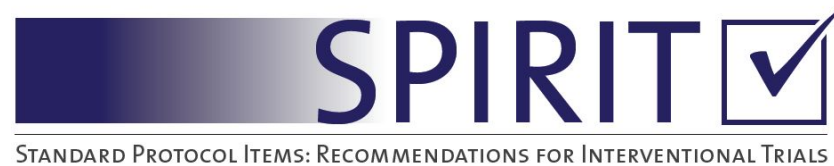

SPIRIT 2013 Checklist: Recommended items to address in a clinical trial protocol and related documents\*

| Section/item                      | Item No | Description                                                                                                                                                                                                                                                                              | Addressed on page number |
|-----------------------------------|---------|------------------------------------------------------------------------------------------------------------------------------------------------------------------------------------------------------------------------------------------------------------------------------------------|--------------------------|
| <b>Administrative information</b> |         |                                                                                                                                                                                                                                                                                          |                          |
| Title                             | 1       | Descriptive title identifying the study design, population, interventions, and, if applicable, trial acronym                                                                                                                                                                             | 1                        |
| Trial registration                | 2a      | Trial identifier and registry name. If not yet registered, name of intended registry                                                                                                                                                                                                     | 4                        |
|                                   | 2b      | All items from the World Health Organization Trial Registration Data Set                                                                                                                                                                                                                 | across whole protocol    |
| Protocol version                  | 3       | Date and version identifier                                                                                                                                                                                                                                                              | 22                       |
| Funding                           | 4       | Sources and types of financial, material, and other support                                                                                                                                                                                                                              | 24                       |
| Roles and responsibilities        | 5a      | Names, affiliations, and roles of protocol contributors                                                                                                                                                                                                                                  | 1 and 24                 |
|                                   | 5b      | Name and contact information for the trial sponsor                                                                                                                                                                                                                                       | 2                        |
|                                   | 5c      | Role of study sponsor and funders, if any, in study design; collection, management, analysis, and interpretation of data; writing of the report; and the decision to submit the report for publication, including whether they will have ultimate authority over any of these activities | 24                       |
|                                   | 5d      | Composition, roles, and responsibilities of the coordinating centre, steering committee, endpoint adjudication committee, data management team, and other individuals or groups overseeing the trial, if applicable (see Item 21a for data monitoring committee)                         | 24                       |



|    |                                                           |     |                                                                                                               |           |
|----|-----------------------------------------------------------|-----|---------------------------------------------------------------------------------------------------------------|-----------|
| 1  | <b>Introduction</b>                                       |     |                                                                                                               |           |
| 2  |                                                           |     |                                                                                                               |           |
| 3  | Background and                                            | 6a  | Description of research question and justification for undertaking the trial, including summary of relevant   |           |
| 4  | rationale                                                 |     | studies (published and unpublished) examining benefits and harms for each intervention                        | 5         |
| 5  |                                                           |     |                                                                                                               |           |
| 6  |                                                           | 6b  | Explanation for choice of comparators                                                                         | 5         |
| 7  |                                                           |     |                                                                                                               |           |
| 8  | Objectives                                                | 7   | Specific objectives or hypotheses                                                                             | 5, 11, 19 |
| 9  |                                                           |     |                                                                                                               |           |
| 10 | Trial design                                              | 8   | Description of trial design including type of trial (eg, parallel group, crossover, factorial, single group), |           |
| 11 |                                                           |     | allocation ratio, and framework (eg, superiority, equivalence, noninferiority, exploratory)                   | 6         |
| 12 |                                                           |     |                                                                                                               |           |
| 13 |                                                           |     |                                                                                                               |           |
| 14 | <b>Methods: Participants, interventions, and outcomes</b> |     |                                                                                                               |           |
| 15 |                                                           |     |                                                                                                               |           |
| 16 | Study setting                                             | 9   | Description of study settings (eg, community clinic, academic hospital) and list of countries where data will |           |
| 17 |                                                           |     | be collected. Reference to where list of study sites can be obtained                                          | 6         |
| 18 |                                                           |     |                                                                                                               |           |
| 19 | Eligibility criteria                                      | 10  | Inclusion and exclusion criteria for participants. If applicable, eligibility criteria for study centres and  |           |
| 20 |                                                           |     | individuals who will perform the interventions (eg, surgeons, psychotherapists)                               | 7         |
| 21 |                                                           |     |                                                                                                               |           |
| 22 | Interventions                                             | 11a | Interventions for each group with sufficient detail to allow replication, including how and when they will be |           |
| 23 |                                                           |     | administered                                                                                                  | 11, 12    |
| 24 |                                                           |     |                                                                                                               |           |
| 25 |                                                           | 11b | Criteria for discontinuing or modifying allocated interventions for a given trial participant (eg, drug dose  |           |
| 26 |                                                           |     | change in response to harms, participant request, or improving/worsening disease)                             | 15        |
| 27 |                                                           |     |                                                                                                               |           |
| 28 |                                                           | 11c | Strategies to improve adherence to intervention protocols, and any procedures for monitoring adherence        |           |
| 29 |                                                           |     | (eg, drug tablet return, laboratory tests)                                                                    | 4, 16     |
| 30 |                                                           |     |                                                                                                               |           |
| 31 |                                                           | 11d | Relevant concomitant care and interventions that are permitted or prohibited during the trial                 |           |
| 32 |                                                           |     |                                                                                                               | 11, 12    |
| 33 |                                                           |     |                                                                                                               |           |
| 34 | Outcomes                                                  | 12  | Primary, secondary, and other outcomes, including the specific measurement variable (eg, systolic blood       |           |
| 35 |                                                           |     | pressure), analysis metric (eg, change from baseline, final value, time to event), method of aggregation (eg, |           |
| 36 |                                                           |     | median, proportion), and time point for each outcome. Explanation of the clinical relevance of chosen         |           |
| 37 |                                                           |     | efficacy and harm outcomes is strongly recommended                                                            | 11        |
| 38 |                                                           |     |                                                                                                               |           |
| 39 |                                                           |     |                                                                                                               |           |
| 40 | Participant timeline                                      | 13  | Time schedule of enrolment, interventions (including any run-ins and washouts), assessments, and visits for   |           |
| 41 |                                                           |     | participants. A schematic diagram is highly recommended (see Figure)                                          | Figure 1  |
| 42 |                                                           |     |                                                                                                               |           |
| 43 |                                                           |     |                                                                                                               |           |
| 44 |                                                           |     |                                                                                                               |           |
| 45 |                                                           |     |                                                                                                               |           |
| 46 |                                                           |     |                                                                                                               |           |

|   |             |    |                                                                                                                                                                                       |    |
|---|-------------|----|---------------------------------------------------------------------------------------------------------------------------------------------------------------------------------------|----|
| 1 | Sample size | 14 | Estimated number of participants needed to achieve study objectives and how it was determined, including clinical and statistical assumptions supporting any sample size calculations | 17 |
| 2 |             |    |                                                                                                                                                                                       |    |
| 3 |             |    |                                                                                                                                                                                       |    |
| 4 | Recruitment | 15 | Strategies for achieving adequate participant enrolment to reach target sample size                                                                                                   | 16 |
| 5 |             |    |                                                                                                                                                                                       |    |

### 6 **Methods: Assignment of interventions (for controlled trials)**

#### 7 Allocation:

|    |                    |     |                                                                                                                                                                                                                                                                                                                                                          |    |
|----|--------------------|-----|----------------------------------------------------------------------------------------------------------------------------------------------------------------------------------------------------------------------------------------------------------------------------------------------------------------------------------------------------------|----|
| 8  |                    |     |                                                                                                                                                                                                                                                                                                                                                          |    |
| 9  |                    |     |                                                                                                                                                                                                                                                                                                                                                          |    |
| 10 | Sequence           | 16a | Method of generating the allocation sequence (eg, computer-generated random numbers), and list of any factors for stratification. To reduce predictability of a random sequence, details of any planned restriction (eg, blocking) should be provided in a separate document that is unavailable to those who enrol participants or assign interventions | 14 |
| 11 | generation         |     |                                                                                                                                                                                                                                                                                                                                                          |    |
| 12 |                    |     |                                                                                                                                                                                                                                                                                                                                                          |    |
| 13 |                    |     |                                                                                                                                                                                                                                                                                                                                                          |    |
| 14 |                    |     |                                                                                                                                                                                                                                                                                                                                                          |    |
| 15 |                    |     |                                                                                                                                                                                                                                                                                                                                                          |    |
| 16 | Allocation         | 16b | Mechanism of implementing the allocation sequence (eg, central telephone; sequentially numbered, opaque, sealed envelopes), describing any steps to conceal the sequence until interventions are assigned                                                                                                                                                | 14 |
| 17 | concealment        |     |                                                                                                                                                                                                                                                                                                                                                          |    |
| 18 | mechanism          |     |                                                                                                                                                                                                                                                                                                                                                          |    |
| 19 |                    |     |                                                                                                                                                                                                                                                                                                                                                          |    |
| 20 | Implementation     | 16c | Who will generate the allocation sequence, who will enrol participants, and who will assign participants to interventions                                                                                                                                                                                                                                | 14 |
| 21 |                    |     |                                                                                                                                                                                                                                                                                                                                                          |    |
| 22 |                    |     |                                                                                                                                                                                                                                                                                                                                                          |    |
| 23 |                    |     |                                                                                                                                                                                                                                                                                                                                                          |    |
| 24 | Blinding (masking) | 17a | Who will be blinded after assignment to interventions (eg, trial participants, care providers, outcome assessors, data analysts), and how                                                                                                                                                                                                                | 14 |
| 25 |                    |     |                                                                                                                                                                                                                                                                                                                                                          |    |
| 26 |                    |     |                                                                                                                                                                                                                                                                                                                                                          |    |
| 27 |                    | 17b | If blinded, circumstances under which unblinding is permissible, and procedure for revealing a participant's allocated intervention during the trial                                                                                                                                                                                                     | 14 |
| 28 |                    |     |                                                                                                                                                                                                                                                                                                                                                          |    |
| 29 |                    |     |                                                                                                                                                                                                                                                                                                                                                          |    |
| 30 |                    |     |                                                                                                                                                                                                                                                                                                                                                          |    |

### 31 **Methods: Data collection, management, and analysis**

|    |                 |     |                                                                                                                                                                                                                                                                                                                                                                                                              |    |
|----|-----------------|-----|--------------------------------------------------------------------------------------------------------------------------------------------------------------------------------------------------------------------------------------------------------------------------------------------------------------------------------------------------------------------------------------------------------------|----|
| 32 |                 |     |                                                                                                                                                                                                                                                                                                                                                                                                              |    |
| 33 | Data collection | 18a | Plans for assessment and collection of outcome, baseline, and other trial data, including any related processes to promote data quality (eg, duplicate measurements, training of assessors) and a description of study instruments (eg, questionnaires, laboratory tests) along with their reliability and validity, if known. Reference to where data collection forms can be found, if not in the protocol | 17 |
| 34 | methods         |     |                                                                                                                                                                                                                                                                                                                                                                                                              |    |
| 35 |                 |     |                                                                                                                                                                                                                                                                                                                                                                                                              |    |
| 36 |                 |     |                                                                                                                                                                                                                                                                                                                                                                                                              |    |
| 37 |                 |     |                                                                                                                                                                                                                                                                                                                                                                                                              |    |
| 38 |                 | 18b | Plans to promote participant retention and complete follow-up, including list of any outcome data to be collected for participants who discontinue or deviate from intervention protocols                                                                                                                                                                                                                    | 17 |
| 39 |                 |     |                                                                                                                                                                                                                                                                                                                                                                                                              |    |
| 40 |                 |     |                                                                                                                                                                                                                                                                                                                                                                                                              |    |
| 41 |                 |     |                                                                                                                                                                                                                                                                                                                                                                                                              |    |
| 42 |                 |     |                                                                                                                                                                                                                                                                                                                                                                                                              |    |

|    |                                 |     |                                                                                                                                                                                                                                                                                                                                       |        |
|----|---------------------------------|-----|---------------------------------------------------------------------------------------------------------------------------------------------------------------------------------------------------------------------------------------------------------------------------------------------------------------------------------------|--------|
| 1  | Data management                 | 19  | Plans for data entry, coding, security, and storage, including any related processes to promote data quality (eg, double data entry; range checks for data values). Reference to where details of data management procedures can be found, if not in the protocol                                                                     | 16, 17 |
| 2  |                                 |     |                                                                                                                                                                                                                                                                                                                                       |        |
| 3  |                                 |     |                                                                                                                                                                                                                                                                                                                                       |        |
| 4  |                                 |     |                                                                                                                                                                                                                                                                                                                                       |        |
| 5  | Statistical methods             | 20a | Statistical methods for analysing primary and secondary outcomes. Reference to where other details of the statistical analysis plan can be found, if not in the protocol                                                                                                                                                              | 17     |
| 6  |                                 |     |                                                                                                                                                                                                                                                                                                                                       |        |
| 7  |                                 |     |                                                                                                                                                                                                                                                                                                                                       |        |
| 8  |                                 | 20b | Methods for any additional analyses (eg, subgroup and adjusted analyses)                                                                                                                                                                                                                                                              | 17     |
| 9  |                                 |     |                                                                                                                                                                                                                                                                                                                                       |        |
| 10 |                                 | 20c | Definition of analysis population relating to protocol non-adherence (eg, as randomised analysis), and any statistical methods to handle missing data (eg, multiple imputation)                                                                                                                                                       | 17     |
| 11 |                                 |     |                                                                                                                                                                                                                                                                                                                                       |        |
| 12 |                                 |     |                                                                                                                                                                                                                                                                                                                                       |        |
| 13 |                                 |     |                                                                                                                                                                                                                                                                                                                                       |        |
| 14 | <b>Methods: Monitoring</b>      |     |                                                                                                                                                                                                                                                                                                                                       |        |
| 15 |                                 |     |                                                                                                                                                                                                                                                                                                                                       |        |
| 16 | Data monitoring                 | 21a | Composition of data monitoring committee (DMC); summary of its role and reporting structure; statement of whether it is independent from the sponsor and competing interests; and reference to where further details about its charter can be found, if not in the protocol. Alternatively, an explanation of why a DMC is not needed | 25     |
| 17 |                                 |     |                                                                                                                                                                                                                                                                                                                                       |        |
| 18 |                                 |     |                                                                                                                                                                                                                                                                                                                                       |        |
| 19 |                                 |     |                                                                                                                                                                                                                                                                                                                                       |        |
| 20 |                                 |     |                                                                                                                                                                                                                                                                                                                                       |        |
| 21 |                                 |     |                                                                                                                                                                                                                                                                                                                                       |        |
| 22 |                                 | 21b | Description of any interim analyses and stopping guidelines, including who will have access to these interim results and make the final decision to terminate the trial                                                                                                                                                               | 16, 17 |
| 23 |                                 |     |                                                                                                                                                                                                                                                                                                                                       |        |
| 24 |                                 |     |                                                                                                                                                                                                                                                                                                                                       |        |
| 25 | Harms                           | 22  | Plans for collecting, assessing, reporting, and managing solicited and spontaneously reported adverse events and other unintended effects of trial interventions or trial conduct                                                                                                                                                     | 15     |
| 26 |                                 |     |                                                                                                                                                                                                                                                                                                                                       |        |
| 27 |                                 |     |                                                                                                                                                                                                                                                                                                                                       |        |
| 28 | Auditing                        | 23  | Frequency and procedures for auditing trial conduct, if any, and whether the process will be independent from investigators and the sponsor                                                                                                                                                                                           | 25     |
| 29 |                                 |     |                                                                                                                                                                                                                                                                                                                                       |        |
| 30 |                                 |     |                                                                                                                                                                                                                                                                                                                                       |        |
| 31 |                                 |     |                                                                                                                                                                                                                                                                                                                                       |        |
| 32 | <b>Ethics and dissemination</b> |     |                                                                                                                                                                                                                                                                                                                                       |        |
| 33 |                                 |     |                                                                                                                                                                                                                                                                                                                                       |        |
| 34 | Research ethics approval        | 24  | Plans for seeking research ethics committee/institutional review board (REC/IRB) approval                                                                                                                                                                                                                                             | 21     |
| 35 |                                 |     |                                                                                                                                                                                                                                                                                                                                       |        |
| 36 |                                 |     |                                                                                                                                                                                                                                                                                                                                       |        |
| 37 | Protocol amendments             | 25  | Plans for communicating important protocol modifications (eg, changes to eligibility criteria, outcomes, analyses) to relevant parties (eg, investigators, REC/IRBs, trial participants, trial registries, journals, regulators)                                                                                                      | 21, 22 |
| 38 |                                 |     |                                                                                                                                                                                                                                                                                                                                       |        |
| 39 |                                 |     |                                                                                                                                                                                                                                                                                                                                       |        |
| 40 |                                 |     |                                                                                                                                                                                                                                                                                                                                       |        |
| 41 |                                 |     |                                                                                                                                                                                                                                                                                                                                       |        |
| 42 |                                 |     |                                                                                                                                                                                                                                                                                                                                       |        |
| 43 |                                 |     |                                                                                                                                                                                                                                                                                                                                       |        |
| 44 |                                 |     |                                                                                                                                                                                                                                                                                                                                       |        |
| 45 |                                 |     |                                                                                                                                                                                                                                                                                                                                       |        |
| 46 |                                 |     |                                                                                                                                                                                                                                                                                                                                       |        |

|    |                               |     |                                                                                                                                                                                                                                                                                     |          |
|----|-------------------------------|-----|-------------------------------------------------------------------------------------------------------------------------------------------------------------------------------------------------------------------------------------------------------------------------------------|----------|
| 1  | Consent or assent             | 26a | Who will obtain informed consent or assent from potential trial participants or authorised surrogates, and how (see Item 32)                                                                                                                                                        | 9        |
| 2  |                               |     |                                                                                                                                                                                                                                                                                     |          |
| 3  |                               |     |                                                                                                                                                                                                                                                                                     |          |
| 4  |                               | 26b | Additional consent provisions for collection and use of participant data and biological specimens in ancillary studies, if applicable                                                                                                                                               | 9        |
| 5  |                               |     |                                                                                                                                                                                                                                                                                     |          |
| 6  |                               |     |                                                                                                                                                                                                                                                                                     |          |
| 7  | Confidentiality               | 27  | How personal information about potential and enrolled participants will be collected, shared, and maintained in order to protect confidentiality before, during, and after the trial                                                                                                | 7, 9     |
| 8  |                               |     |                                                                                                                                                                                                                                                                                     |          |
| 9  |                               |     |                                                                                                                                                                                                                                                                                     |          |
| 10 | Declaration of interests      | 28  | Financial and other competing interests for principal investigators for the overall trial and each study site                                                                                                                                                                       | 24, 25   |
| 11 |                               |     |                                                                                                                                                                                                                                                                                     |          |
| 12 |                               |     |                                                                                                                                                                                                                                                                                     |          |
| 13 | Access to data                | 29  | Statement of who will have access to the final trial dataset, and disclosure of contractual agreements that limit such access for investigators                                                                                                                                     | 16       |
| 14 |                               |     |                                                                                                                                                                                                                                                                                     |          |
| 15 |                               |     |                                                                                                                                                                                                                                                                                     |          |
| 16 | Ancillary and post-trial care | 30  | Provisions, if any, for ancillary and post-trial care, and for compensation to those who suffer harm from trial participation                                                                                                                                                       | NA       |
| 17 |                               |     |                                                                                                                                                                                                                                                                                     |          |
| 18 |                               |     |                                                                                                                                                                                                                                                                                     |          |
| 19 |                               |     |                                                                                                                                                                                                                                                                                     |          |
| 20 | Dissemination policy          | 31a | Plans for investigators and sponsor to communicate trial results to participants, healthcare professionals, the public, and other relevant groups (eg, via publication, reporting in results databases, or other data sharing arrangements), including any publication restrictions | 21       |
| 21 |                               |     |                                                                                                                                                                                                                                                                                     |          |
| 22 |                               |     |                                                                                                                                                                                                                                                                                     |          |
| 23 |                               |     |                                                                                                                                                                                                                                                                                     |          |
| 24 |                               | 31b | Authorship eligibility guidelines and any intended use of professional writers                                                                                                                                                                                                      | 24       |
| 25 |                               |     |                                                                                                                                                                                                                                                                                     |          |
| 26 |                               | 31c | Plans, if any, for granting public access to the full protocol, participant-level dataset, and statistical code                                                                                                                                                                     | 25       |
| 27 |                               |     |                                                                                                                                                                                                                                                                                     |          |
| 28 |                               |     |                                                                                                                                                                                                                                                                                     |          |
| 29 | <b>Appendices</b>             |     |                                                                                                                                                                                                                                                                                     |          |
| 30 |                               |     |                                                                                                                                                                                                                                                                                     |          |
| 31 | Informed consent materials    | 32  | Model consent form and other related documentation given to participants and authorised surrogates                                                                                                                                                                                  | attached |
| 32 |                               |     |                                                                                                                                                                                                                                                                                     |          |
| 33 |                               |     |                                                                                                                                                                                                                                                                                     |          |
| 34 | Biological specimens          | 33  | Plans for collection, laboratory evaluation, and storage of biological specimens for genetic or molecular analysis in the current trial and for future use in ancillary studies, if applicable                                                                                      | Table 1  |
| 35 |                               |     |                                                                                                                                                                                                                                                                                     |          |
| 36 |                               |     |                                                                                                                                                                                                                                                                                     |          |

\*It is strongly recommended that this checklist be read in conjunction with the SPIRIT 2013 Explanation & Elaboration for important clarification on the items. Amendments to the protocol should be tracked and dated. The SPIRIT checklist is copyrighted by the SPIRIT Group under the Creative Commons [“Attribution-NonCommercial-NoDerivs 3.0 Unported”](https://creativecommons.org/licenses/by-nc-nd/3.0/) license.

# BMJ Open

## Minimally invasive versus open total GAstrectomy (MEGA): Study protocol for a multicenter randomized controlled trial (DRKS00025765)

|                               |                                                                                                                                                                                                                                                                                                                                                                                                                                                                                                                                                                                                                                                                                                                                                                                                                                                                                                                                                                                                                                                                                                                                                                                                                                                                                                                                                                                                                                                                                                                                                                                                                                                                                                                                                                                                                                                                                                                                                                                                                                                                                                                                                                                                                                  |
|-------------------------------|----------------------------------------------------------------------------------------------------------------------------------------------------------------------------------------------------------------------------------------------------------------------------------------------------------------------------------------------------------------------------------------------------------------------------------------------------------------------------------------------------------------------------------------------------------------------------------------------------------------------------------------------------------------------------------------------------------------------------------------------------------------------------------------------------------------------------------------------------------------------------------------------------------------------------------------------------------------------------------------------------------------------------------------------------------------------------------------------------------------------------------------------------------------------------------------------------------------------------------------------------------------------------------------------------------------------------------------------------------------------------------------------------------------------------------------------------------------------------------------------------------------------------------------------------------------------------------------------------------------------------------------------------------------------------------------------------------------------------------------------------------------------------------------------------------------------------------------------------------------------------------------------------------------------------------------------------------------------------------------------------------------------------------------------------------------------------------------------------------------------------------------------------------------------------------------------------------------------------------|
| Journal:                      | <i>BMJ Open</i>                                                                                                                                                                                                                                                                                                                                                                                                                                                                                                                                                                                                                                                                                                                                                                                                                                                                                                                                                                                                                                                                                                                                                                                                                                                                                                                                                                                                                                                                                                                                                                                                                                                                                                                                                                                                                                                                                                                                                                                                                                                                                                                                                                                                                  |
| Manuscript ID                 | bmjopen-2022-064286.R1                                                                                                                                                                                                                                                                                                                                                                                                                                                                                                                                                                                                                                                                                                                                                                                                                                                                                                                                                                                                                                                                                                                                                                                                                                                                                                                                                                                                                                                                                                                                                                                                                                                                                                                                                                                                                                                                                                                                                                                                                                                                                                                                                                                                           |
| Article Type:                 | Protocol                                                                                                                                                                                                                                                                                                                                                                                                                                                                                                                                                                                                                                                                                                                                                                                                                                                                                                                                                                                                                                                                                                                                                                                                                                                                                                                                                                                                                                                                                                                                                                                                                                                                                                                                                                                                                                                                                                                                                                                                                                                                                                                                                                                                                         |
| Date Submitted by the Author: | 04-Sep-2022                                                                                                                                                                                                                                                                                                                                                                                                                                                                                                                                                                                                                                                                                                                                                                                                                                                                                                                                                                                                                                                                                                                                                                                                                                                                                                                                                                                                                                                                                                                                                                                                                                                                                                                                                                                                                                                                                                                                                                                                                                                                                                                                                                                                                      |
| Complete List of Authors:     | <p>Nickel, Felix; UniversitätsKlinikum Heidelberg, Department of General, Visceral and Transplantation Surgery<br/> Studier-Fischer, Alexander; UniversitätsKlinikum Heidelberg, Department of General, Visceral and Transplantation Surgery<br/> Haussmann, David; UniversitätsKlinikum Heidelberg, Department of General, Visceral and Transplantation Surgery<br/> Klotz, Rosa; UniversitätsKlinikum Heidelberg, Department of General, Visceral and Transplantation Surgery; Study Center of the German Society of Surgery<br/> Vogel-Adigozalov, Sophia; UniversitätsKlinikum Heidelberg, Department of General, Visceral and Transplantation Surgery; Study Center of the German Society of Surgery<br/> Tenckhoff, Solveig; UniversitätsKlinikum Heidelberg, Department of General, Visceral and Transplantation Surgery; Study Center of the German Society of Surgery<br/> Klose, Christina; UniversitätsKlinikum Heidelberg, Institute of Medical Biometry and Informatics<br/> Feisst, Manuel; UniversitätsKlinikum Heidelberg, Institute of Medical Biometry<br/> Zimmermann, Samuel; UniversitätsKlinikum Heidelberg, Institute of Medical Biometry<br/> Babic, Benjamin; University Hospital Cologne, Department of General, Visceral and Tumor and Transplantation Surgery<br/> Berlt, Felix; Johannes Gutenberg University Hospital Mainz, Department of General, Visceral and Transplantation Surgery<br/> Bruns, Christiane; University Hospital Cologne, Department of General, Visceral, Tumor and Transplantation Surgery<br/> Gockel, Ines; UniversitätsKlinikum Leipzig, Department of Visceral, Transplantation, Thoracic and Vascular Surgery<br/> Graf, Sandra; University Hospital Ulm, Department of General and Visceral Surgery<br/> Grimminger, Peter; Johannes Gutenberg University Hospital Mainz, Department of General, Visceral and Transplantation Surgery<br/> Gutschow, Christian; University Hospital Zurich, Department of Visceral and Transplantation Surgery<br/> Hoepfner, Jens; University Medical Center Schleswig Holstein Lübeck Campus, Department of Surgery<br/> Ludwig, Kaja; Klinikum Sudstadt Rostock, Department of General, Visceral, Thoracic and Vascular Surgery</p> |

|                                 |                                                                                                                                                                                                                                                                                                                                                                                                                                                                                                                                                                                                                                                                                                                                                                                                                                                                                                                                                                                                                              |
|---------------------------------|------------------------------------------------------------------------------------------------------------------------------------------------------------------------------------------------------------------------------------------------------------------------------------------------------------------------------------------------------------------------------------------------------------------------------------------------------------------------------------------------------------------------------------------------------------------------------------------------------------------------------------------------------------------------------------------------------------------------------------------------------------------------------------------------------------------------------------------------------------------------------------------------------------------------------------------------------------------------------------------------------------------------------|
|                                 | Mirow, Lutz; Klinikum Chemnitz gGmbH, Department of General and Visceral Surgery<br>Mönig, Stefan; Geneva University Hospitals, Department of Digestive Surgery<br>Reim, Daniel; University Hospital Munich, Department of Surgery<br>Seyfried, Florian; Central Würzburg Hospital, Department of General, Visceral, Transplant, Vascular and Pediatric Surgery<br>Stange, Daniel; Technische Universität Dresden, Department of Visceral, Thoracic and Vascular Surgery<br>Billeter, Adrian; UniversitätsKlinikum Heidelberg, Department of General, Visceral, and Transplantation Surgery<br>Nienhüser, Henrik; UniversitätsKlinikum Heidelberg, Department of General, Visceral and Transplantation Surgery<br>Probst, Pascal; Kantonsspital Frauenfeld, Department of Surgery<br>Schmidt, Thomas; University Hospital Cologne, Department of General, Visceral and Tumor and Transplantation Surgery<br>Müller-Stich, Beat; UniversitätsKlinikum Heidelberg, Department of General, Visceral and Transplantation Surgery |
| <b>Primary Subject Heading</b>: | Surgery                                                                                                                                                                                                                                                                                                                                                                                                                                                                                                                                                                                                                                                                                                                                                                                                                                                                                                                                                                                                                      |
| Secondary Subject Heading:      | Oncology                                                                                                                                                                                                                                                                                                                                                                                                                                                                                                                                                                                                                                                                                                                                                                                                                                                                                                                                                                                                                     |
| Keywords:                       | SURGERY, ONCOLOGY, Gastrointestinal tumours < ONCOLOGY                                                                                                                                                                                                                                                                                                                                                                                                                                                                                                                                                                                                                                                                                                                                                                                                                                                                                                                                                                       |
|                                 |                                                                                                                                                                                                                                                                                                                                                                                                                                                                                                                                                                                                                                                                                                                                                                                                                                                                                                                                                                                                                              |

SCHOLARONE™  
Manuscripts

1  
2  
3 1 **Minimally invasivE versus open total GAstrectomy (MEGA): Study protocol for**  
4  
5 2 **a multicenter randomized controlled trial (DRKS00025765)**  
6

7  
8 3 Felix Nickel<sup>1\*</sup>, Alexander Studier-Fischer<sup>1\*</sup>, David Haussmann<sup>1</sup>, Rosa Klotz<sup>1,2</sup>, Sophia  
9  
10 4 Vogel-Adigozalov<sup>1,2</sup>, Solveig Tenckhoff<sup>1,2</sup>, Christina Klose<sup>3</sup>, Manuel Feisst<sup>3</sup>, Samuel  
11  
12 5 Zimmermann<sup>3</sup>, Benjamin Babic<sup>4</sup>, Felix Berlt<sup>5</sup>, Christiane Bruns<sup>4</sup>, Ines Gockel<sup>6</sup>,  
13  
14 6 Sandra Graf<sup>7</sup>, Peter Grimminger<sup>5</sup>, Christian Gutschow<sup>8</sup>, Jens Hoepfner<sup>9</sup>, Kaja  
15  
16 7 Ludwig<sup>10</sup>, Lutz Mirow<sup>11</sup>, Stefan Mönig<sup>12</sup>, Daniel Reim<sup>13</sup>, Florian Seyfried<sup>14</sup>, Daniel  
17  
18 8 Stange<sup>15</sup>, Adrian Billeter<sup>1</sup>, Henrik Nienhüser<sup>1</sup>, Pascal Probst<sup>16</sup>, Thomas Schmidt<sup>4</sup>,  
19  
20 9 Beat P. Müller-Stich<sup>1</sup>  
21  
22

23  
24 10

25  
26 11 \*Contributed equally  
27

28  
29 12

30  
31 13 <sup>1</sup>Department of General, Visceral and Transplantation Surgery, Heidelberg University  
32  
33 14 Hospital, Heidelberg, Germany  
34

35  
36 15 <sup>2</sup>Study Center of the German Society of Surgery, Heidelberg, Germany  
37

38  
39 16 <sup>3</sup>Institute of Medical Biometry, Heidelberg, Germany  
40

41  
42 17 <sup>4</sup>Department of General, Visceral and Tumor and Transplantation Surgery, Cologne  
43  
44 18 University Hospital, Cologne, Germany  
45

46  
47 19 <sup>5</sup>Department of General, Visceral and Transplantation Surgery, Mainz University  
48  
49 20 Hospital, Mainz, Germany  
50

51  
52 21 <sup>6</sup>Department of Visceral, Transplantation, Thoracic and Vascular Surgery, Leipzig  
53  
54 22 University Hospital, Leipzig, Germany  
55

56  
57 23 <sup>7</sup>Department of General and Visceral Surgery, Ulm University Hospital, Ulm,  
58  
59 24 Germany  
60

25  
26 25 <sup>8</sup>Department of Visceral and Transplantation Surgery, Zurich University Hospital,  
Zurich, Switzerland

1  
2  
3 27 <sup>9</sup>Department of Surgery, University Medical Center Schleswig-Holstein, Campus  
4  
5 28 Lübeck, Germany

6  
7  
8 29 <sup>10</sup>Department of General, Visceral, Thoracic and Vascular Surgery, Rostock Südstadt  
9  
10 30 Hospital, Rostock, Germany

11  
12 31 <sup>11</sup>Department of General and Visceral Surgery, Klinikum Chemnitz gGmbH,  
13  
14 32 Chemnitz, Germany

15  
16  
17 33 <sup>12</sup>Department of Digestive Surgery, Geneva University Hospital, Geneva, Switzerland

18  
19 34 <sup>13</sup>Department of Surgery, TUM University Hospital, Munich, Germany

20  
21 35 <sup>14</sup>Department of General, Visceral, Transplant, Vascular and Pediatric Surgery,  
22  
23 36 Würzburg University Hospital, Würzburg, Germany

24  
25  
26 37 <sup>15</sup>Department of Visceral, Thoracic and Vascular Surgery, Dresden University  
27  
28 38 Hospital, Dresden, Germany

29  
30 39 <sup>16</sup>Department of Surgery, Cantonal Hospital Frauenfeld, Thurgau, Switzerland

31  
32  
33 40

34  
35 41

36  
37 42 Correspondence & Trial Sponsor:

38  
39 43 Prof. Dr. Beat Müller, [BeatPeter.Mueller@med.uni-heidelberg.de](mailto:BeatPeter.Mueller@med.uni-heidelberg.de)

40  
41  
42 44 Department of General, Visceral and Transplantation Surgery, Heidelberg University  
43  
44 45 Hospital, Im Neuenheimer Feld 420, 69120 Heidelberg, Germany

45  
46  
47 46

48  
49 47 **Abstract**

50  
51 48 **Introduction:**

52  
53 49 The only curative treatment for most gastric cancer is radical gastrectomy with D2  
54  
55 50 lymphadenectomy (LAD). Minimally invasive total gastrectomy (MIG) aims to reduce  
56  
57 51 postoperative morbidity, but its use has not yet been widely established in Western  
58  
59  
60



1  
2  
3 52 countries. MEGA is the first Western multicenter randomized controlled trial (RCT) to  
4  
5 53 compare postoperative morbidity following MIG versus open total gastrectomy (OG).  
6  
7  
8 54

9  
10 55 **Methods and analysis:**

11  
12 56 This superiority multicenter RCT compares MIG (intervention) to OG (control) for  
13  
14 57 oncological total gastrectomy with D2 or D2+ LAD. Recruitment is expected to last for  
15  
16 58 2 years. Inclusion criteria comprise age between 18 and 84 years and planned total  
17  
18 59 gastrectomy after initial diagnosis of gastric carcinoma. Exclusion criteria include  
19  
20 60 ECOG performance status > 2 (**Appendix 1**), tumors requiring extended gastrectomy  
21  
22 61 or less than total gastrectomy, previous abdominal surgery or extensive adhesions  
23  
24 62 seriously complicating MIG, other active oncologic disease, advanced stages (T4 or  
25  
26 63 M1), emergency setting, and pregnancy.

27  
28  
29 64 The sample size was calculated at 80 participants per group. The primary endpoint is  
30  
31 65 30-day postoperative morbidity as measured by the Comprehensive Complications  
32  
33 66 Index (CCI). Secondary endpoints include postoperative morbidity and mortality,  
34  
35 67 adherence to a fast-track protocol, and patient-reported quality of life (QoL) scores  
36  
37 68 (QoR-15, EUROQOL EQ-5D-5L, EORTC QLQ-C30, EORTC QLQ-STO22, ADLs,  
38  
39 69 and BIS). Oncologic endpoints include rate of R0 resection, lymph node yield,  
40  
41 70 disease-free survival, and overall survival at 60-month follow-up.  
42  
43  
44  
45  
46  
47  
48

49 72 **Ethics and dissemination:**

50  
51 73 Ethical approval has been received by the independent Ethics Committee of the  
52  
53 74 Medical Faculty, University of Heidelberg (S-816/2021) and will be received from  
54  
55 75 each responsible ethics committee for each individual participating center prior to  
56  
57 76 recruitment. Results will be published open access.  
58  
59  
60

77

1  
2  
3 78 **Trial registration:** German Clinical Trials Register DRKS00025765. Registered on  
4  
5 79 December 22<sup>nd</sup>, 2021.  
6  
7  
8 80  
9

10 81 **Keywords:** Minimally invasive gastrectomy, total gastrectomy, gastric cancer, Roux-  
11  
12 82 Y reconstruction, linear stapled anastomosis, circular stapled anastomosis,  
13  
14 83 randomized controlled trial, comprehensive complication index, fast-track, enhanced  
15  
16  
17 84 recovery after surgery  
18  
19 85

20  
21 86 **Strengths and limitations of this study**  
22

- 23  
24 87 - MEGA is the first Western multicenter RCT to specifically compare OG with  
25  
26 88 MIG in terms of postoperative morbidity using the comprehensive complication  
27  
28 89 index (CCI).  
29  
30 90 - Usage of the CCI as a comprehensive outcome measure allows for objective  
31  
32 91 comparisons with other trials.  
33  
34 92 - Differentiation between robotic and laparoscopic total gastrectomy will be  
35  
36 93 made in the explorative subgroup analysis only.  
37  
38 94 - High levels of standardization, intraoperative photo documentation, well-  
39  
40 95 powered group sizes, and risk-based monitoring by the Study Center of the  
41  
42 96 German Society of Surgery (SDGC) will guarantee objective data acquisition,  
43  
44 97 increase patients' adherence to the protocol, and ultimately lead to exceptional  
45  
46 98 data quality.  
47  
48  
49  
50

51 99  
52  
53  
54  
55  
56  
57  
58  
59  
60

## 100 Introduction

101 Gastric cancer is the sixth most common tumor disease in the world and causes the  
102 second most deaths [1]. In 2018, approximately one million patients worldwide and  
103 approximately 15,000 patients in Germany were diagnosed with gastric cancer, of  
104 which an average of 76% die from the disease [1]. Gastric cancer causes one of the  
105 highest oncologic disease burdens as measured by lost disability-adjusted life years  
106 (DALY). This fact highlights the aggressiveness of the disease. Age-adjusted DALY  
107 rates per 100,000 reach 241 for men and 146 for women, ranking 4th after liver, lung,  
108 and breast cancer [2, 3].

109 Currently, the only therapy that offers a chance of cure is gastrectomy, with a 5-year  
110 survival rate of 20-30% and postoperative morbidity and mortality as high as 63% [4]  
111 and 11% [5-10], even at experienced centers [4-18]. Therefore, there is a great need  
112 to identify the optimal surgical approach using evidence from multicenter data in  
113 order to improve oncologic outcome and to decrease postoperative complications.

114 The current gold standard is open gastrectomy (OG) with D2 lymphadenectomy  
115 (LAD) (**Appendix 2**), but its highly invasive nature leads to potentially high  
116 complication rates, especially in elderly and obese patients. These frequent  
117 postoperative complications result in higher mortality, lower QoL, a longer hospital  
118 stay, and thus a higher burden on the health care system [6, 19]. In other fields of  
119 visceral surgery, such as appendectomy, cholecystectomy, obesity surgery, and  
120 esophagectomy, minimally invasive surgery has already replaced the open approach  
121 as the standard of care [7, 20-22]. Several randomized controlled trials (RCT) have  
122 demonstrated reduced postoperative complications following minimally invasive  
123 surgery compared to the open approach. This finding is due to the procedure's  
124 resulting smaller wounds, reduced operative trauma, lower blood loss, shorter  
125 hospital stay, and faster rehabilitation time [22-24].

1  
2  
3 126 Postoperative complications, however, are not only important for the immediate  
4  
5 127 postoperative course, which is usually secondary in relevance, but can also affect  
6  
7 128 long-term oncologic outcome [25-27]. In a study of 432 patients with curative  
8  
9 129 gastrectomy and D2 LAD for treatment of gastric cancer, the occurrence of  
10  
11 130 postoperative in-hospital complications was an independent predictor of worse 5-year  
12  
13 131 survival (22% vs. 40%). This can be perceived as an indication that postoperative  
14  
15 132 complications may lead to higher mortality in the long term [28]. Therefore, the trend  
16  
17 133 towards favoring minimally invasive gastrectomy (MIG) for gastric cancer is  
18  
19 134 increasing.  
20  
21  
22  
23  
24  
25

## 26 136 **Methods and analysis**

### 27 137 **Setting**

28  
29  
30 138 The MEGA trial is a prospective randomized, controlled, non-blinded, two-armed  
31  
32 139 multicenter surgical superiority trial with a confirmatory character. It includes 14  
33  
34 140 surgical centers in Germany and Switzerland and is coordinated by the Department  
35  
36 141 of General, Visceral and Transplantation Surgery at Heidelberg University Hospital,  
37  
38 142 in Germany. Recruitment is planned for 2 consecutive years. The study protocol was  
39  
40 143 accepted by the Independent Ethics Committee of the Medical Faculty, University of  
41  
42 144 Heidelberg (registration number S-816/2021) prior to recruitment. The trial was  
43  
44 145 registered at DRKS under the registration number DRKS00025765 on December  
45  
46 146 22<sup>nd</sup>, 2021 [29]. No secondary identifying numbers such as a Universal Trial Number  
47  
48 147 have been assigned. Recommendations of the SPIRIT (Standard Protocol Items:  
49  
50 148 Recommendations for Interventional Trials) checklist were followed [30].  
51  
52  
53  
54  
55  
56  
57  
58  
59  
60

149  
150  
151

## 152 **Patient recruitment**

153 Recruitment is planned to take place at 14 surgical centers in Germany and  
154 Switzerland. Certain eligibility criteria have to be met by the participating centers and  
155 surgeons in order to eliminate bias from inexperience or learning curves. Therefore,  
156 hospitals need to have a case load of  $\geq 20$  gastrectomies per year, and every trial  
157 surgeon has to provide evidence of at least 20 previously performed surgeries of the  
158 respective surgical procedure/s he or she wants to contribute [OG, laparoscopic  
159 gastrectomy (LAG) or robotic-assisted gastrectomy (RAG)]. Eligible patients will be  
160 screened consecutively to eliminate selection bias and will receive diagnostic staging  
161 laparoscopy prior to randomization.

### 162 Inclusion criteria:

- 163 - Age between 18 and 84 years
- 164 - Planned total gastrectomy after first diagnosis of gastric carcinoma
- 165 - Ability of patient to understand character and consequences of the trial
- 166 - Written informed consent

### 167 Exclusion criteria:

- 168 - ECOG performance status  $> 2$
- 169 - Planned extended gastrectomy or less than total gastrectomy (e.g.,  
170 adenocarcinoma of the esophagogastric junction (AEG) I and AEG II, or distal  
171 gastric tumors of an intestinal subtype)
- 172 - Previous gastric surgery or extensive adhesions seriously complicating MIG
- 173 - Other active oncologic disease or history of cancer limiting prognosis in  
174 comparison to the gastric cancer
- 175 - Emergency setting
- 176 - Language barriers rendering the patient unable to fill out patient-reported  
177 outcome questionnaires

- 1  
2  
3 178 - Participation in another intervention trial that might interfere with the  
4  
5 179 intervention and/or outcome of this trial  
6  
7  
8 180 - Pregnancy  
9

10 181 Exclusion criteria previously or during staging laparoscopy:

- 11  
12 182 - T4  
13  
14 183 - M1  
15  
16

17 184 Neoadjuvant chemotherapy does explicitly not contribute to inclusion or exclusion  
18  
19 185 criteria, but will of course be monitored. Inclusion takes place after the staging  
20  
21 186 laparoscopy, and patients will be randomized to the intervention arm (MIG) or the  
22  
23 187 control arm (OG) (**Figure 1**).  
24  
25

26 188

### 27 28 189 **Trial duration and schedule**

29  
30 190 Recruitment is planned to take 24 months. The duration of the trial for each patient is  
31  
32 191 expected to be 1 month for the primary endpoint and 60 months for the secondary  
33  
34 192 endpoints with long-term follow-up. Consequently, the duration of data collection is  
35  
36 193 expected to be 25 months for the primary endpoint and 84 months for the secondary  
37  
38 194 endpoints [first-patient-in (FPI) to last-patient-out (LPO)]. FPI is planned for  
39  
40 195 September 2022 and Last-patient-in (LPI) is planned for September 2024. LPO is  
41  
42 196 consequently planned for September 2029. Trial analysis will take an additional 6  
43  
44 197 months. The actual overall duration or recruitment time may differ. Recruitment is  
45  
46 198 planned to be active until both arms contain at least 80 patients in the intention-to-  
47  
48 199 treat (ITT) dataset.  
49  
50  
51  
52

53 200

### 54 55 201 **Trial visits**

56  
57 202 Patients will be monitored intraoperatively, on postoperative days (POD) 1, 3, and 5,  
58  
59 203 and on the day of discharge. Follow-up will be conducted on POD 30, 90, and after  
60

204 postoperative months (POM) 6, 12, 24, 36, 48, and 60 (**Table 1**). Demographic and  
 205 baseline clinical data, intraoperative findings, and postoperative results will be  
 206 recorded. During follow-up, patients will complete established and validated  
 207 questionnaires. To enhance participant retention and to avoid loss to follow-up,  
 208 patients will be contacted for the completion of questionnaires and to collect missing  
 209 data. Informed consent will be obtained and trial data will be collected by trained  
 210 assessors using electronic case report forms (eCRFs).

211  
 212 **Table 1 | Trial visits and overview over documented parameters & outcomes**

| Activity & Documentation                                            | Visit 1<br>(screening) | Visit 2<br>(laparosc.) | Visit 3<br>(surgery) | Visit 4-6<br>(POD 1, 3, 5) | Visit 7<br>(dis-charge) | Visit 8-9<br>(POD 30, 90) | Visit 10-15<br>(POM 6, 12, 24, 36, 48, 60) |
|---------------------------------------------------------------------|------------------------|------------------------|----------------------|----------------------------|-------------------------|---------------------------|--------------------------------------------|
| inclusion & exclusion criteria                                      | X                      |                        |                      |                            |                         |                           |                                            |
| informed consent                                                    | X                      |                        |                      |                            |                         |                           |                                            |
| medical history & preoperative assessment*                          | X                      |                        |                      |                            |                         |                           |                                            |
| randomization                                                       |                        | X                      |                      |                            |                         |                           |                                            |
| surgical & anaesthetic documentation**                              |                        |                        | X                    |                            |                         |                           |                                            |
| <b>Postoperative morbidity measured with CCI (primary endpoint)</b> | X                      |                        | X                    | X                          | X                       | X                         |                                            |
| <b>scores / questionnaires</b>                                      |                        |                        |                      |                            |                         |                           |                                            |
| EUROQOL EQ-5D-5L                                                    | X                      |                        |                      |                            | X                       | X                         | X                                          |
| EORTC QLQ-C30                                                       | X                      |                        |                      |                            | X                       | X                         | X                                          |
| EORTC QLQ-STO22                                                     | X                      |                        |                      |                            | X                       | X                         | X                                          |
| QoR-15                                                              |                        |                        |                      | X (V5)                     |                         |                           |                                            |
| ADLs                                                                | X                      |                        |                      | X                          | X                       | X                         | X                                          |
| BIS                                                                 |                        |                        |                      |                            |                         |                           | X (V13)                                    |
| <b>biological specimen retrieval</b>                                |                        |                        |                      |                            |                         |                           |                                            |
| EDTA blood samples                                                  | X                      |                        |                      |                            |                         |                           |                                            |
| formalin and paraffin tissue samples                                |                        |                        | X                    |                            |                         |                           |                                            |
|                                                                     | Visit 1<br>(screening) | Visit 2<br>(laparosc.) | Visit 3<br>(surgery) | Visit 4-6<br>(POD 1, 3, 5) | Visit 7<br>(dis-charge) | Visit 8-9<br>(POD 30, 90) | Visit 10-15<br>(POM 6, 12, 24, 36, 48, 60) |
| <b>Short-term clinical data</b>                                     |                        |                        |                      |                            |                         |                           |                                            |
| Conversion rate                                                     |                        |                        | X                    |                            |                         |                           |                                            |
| Operation time                                                      |                        |                        | X                    |                            |                         |                           |                                            |
| Blood loss                                                          |                        |                        | X                    |                            |                         |                           |                                            |
| Length of stay in the ICU                                           |                        |                        | X                    |                            | X                       |                           |                                            |
| Length of hospital stay                                             |                        |                        |                      |                            | X                       |                           |                                            |
| Pain and postoperative analgesic required                           |                        |                        |                      | X                          | X                       |                           |                                            |
| Laboratory parameters (CRP, leucocytes)                             |                        |                        |                      | X                          | X                       |                           |                                            |
| Mobilization of the patient                                         |                        |                        |                      | X                          |                         |                           |                                            |
| Quality of the patient's recovery                                   |                        |                        |                      | X                          |                         |                           |                                            |
| Quality of life                                                     | X                      |                        |                      |                            | X                       | X                         | X                                          |
| Adherence to a fast-track gastrectomy SOP                           |                        |                        | X                    | X                          | X                       |                           |                                            |
| Subjective evaluation of anastomoses                                |                        |                        | X                    |                            |                         |                           |                                            |
| First bowl function and mobilization                                |                        |                        |                      | X                          |                         |                           |                                            |
| Wound healing deficits                                              |                        |                        |                      | X                          | X                       | X (V8)                    |                                            |
| Vegetative function                                                 |                        |                        |                      |                            |                         | X                         | X                                          |
| Necessity of interventions due to complications                     |                        |                        |                      | X                          | X                       | X                         | X                                          |
| <b>Oncologic short-term data</b>                                    |                        |                        |                      |                            |                         |                           |                                            |
| Number of lymph nodes removed and of tumor-positive                 |                        |                        | X                    |                            |                         |                           |                                            |

|  |                                                           |   |  |   |   |        |         |
|--|-----------------------------------------------------------|---|--|---|---|--------|---------|
|  | lymph nodes                                               |   |  |   |   |        |         |
|  | Number of R0 resections                                   |   |  | X |   |        |         |
|  | Development of tumor markers                              |   |  | X |   |        |         |
|  | Tumor histopathology                                      |   |  | X |   |        |         |
|  | <b>Long-term clinical data (5-year follow-up)</b>         |   |  |   |   |        |         |
|  | Changes of body weight                                    |   |  |   | X | X      | X       |
|  | Quality of life                                           | X |  |   | X | X      | X       |
|  | Incidence of incisional hernias                           |   |  |   |   | X      | X       |
|  | Incidence of reoperations                                 |   |  | X | X | X      | X       |
|  | Incidence of stenosis                                     |   |  |   |   | X      | X       |
|  | Cosmetic results and scar satisfaction                    |   |  |   |   |        | X (v13) |
|  | <b>Oncologic long-term data (5-year follow-up)</b>        |   |  |   |   |        |         |
|  | Oncologic treatment (adjuvant and consecutive therapy)    |   |  |   |   | X      | X       |
|  | Disease-free survival; DFS; recurrence free survival; RFS |   |  |   |   | X (v9) | X       |
|  | Local recurrence; LR                                      |   |  |   |   | X (v9) | X       |
|  | Relapse-free survival; RFS                                |   |  |   |   | X (v9) | X       |
|  | Progression-free survival; PFS                            |   |  |   |   | X (v9) | X       |
|  | Time to progression; TTP                                  |   |  |   |   | X (v9) | X       |
|  | Overall survival; OS                                      |   |  |   |   | X (v9) | X       |

213

214 \* Includes body mass index, ASA status, preoperative oncological status, prior  
 215 surgical treatment, drug use and comorbidities. \*\* Includes surgical documentation  
 216 (surgeons, procedures, complications, drains) & anesthesiology documentation. \*\*\*  
 217 Includes dysphagia, reflux, and dumping syndromes. \*\*\*\* Includes entity, TNM,  
 218 grading, and resection status. ASA American Society of Anesthesiologists  
 219 classification, POD postoperative day, POM postoperative month, QoL quality of life,  
 220 EUROQOL EQ-5D-5L EuroQol Group Questionnaire for Quality of Life with 5  
 221 dimensions and 5 levels, EORTC QLQ-C30 European Organisation for Research  
 222 and Treatment of Cancer Quality of Life Questionnaire Core 30, EORTC QLQ-  
 223 STO22 European Organisation for Research and Treatment of Cancer Quality of Life  
 224 Questionnaire for Gastric Cancer, QoR-15 Quality of Recovery 15, ADLs activities of  
 225 daily living (**Appendix 3**), BIS Body Image Scale, ITT intention-to-treat, VAS visual  
 226 analog scale of pain, need for ICU intermediate / intensive care unit, CCI  
 227 Comprehensive Complication Index for complications & related interventions  
 228 according to the Clavien-Dindo classification (**Appendix 4**).

229

230

231



### 232 **Primary endpoint**

233 The primary endpoint will be postoperative morbidity measured using the  
234 Comprehensive Complication Index (CCI) until postoperative day 30 [31]. Usage of  
235 this index will enable a comparison of the severity and individual burden of  
236 postoperative complications with results from other trials [32, 33]. Postoperative  
237 morbidity is defined as any deviation from the normal postoperative course according  
238 to the Clavien-Dindo classification [34]. This includes anastomotic insufficiency or  
239 loss of anastomotic integrity verified by either CT scan with detection of contrast  
240 agent external to the anastomosis, endoscopy, or the detection of methylene blue in  
241 a drain following oral intake.

### 243 **Secondary endpoints**

244 Secondary endpoints can be separated into short-term clinical and oncological  
245 endpoints as well as long-term clinical and oncological endpoints (at 5-year follow-up,  
246 as measured from the date of surgery) and can be found in **Table 1**.

### 248 **Standardized therapy and trial interventions**

249 **Control:** Total OG with D2/D2+ LAD.

250 **Intervention:** Total MIG with D2/D2+ LAD either as LAG or RAG. A mini-laparotomy  
251 or a Pfannenstiel incision ( $\leq 8$  cm incision in both the skin and fascia) may be  
252 performed for specimen removal.

253 Modified cardia-preserving total gastrectomy (preservation of gastroesophageal  
254 junction) can also be accepted, but only if the short gastric vessels are dissected as  
255 well, and if LAD is the same as for total gastrectomy. Besides the open or minimally-  
256 invasive approach, the remaining treatment is identical in both groups. Any other  
257 form of gastrectomy, explicitly conventional subtotal gastrectomy (preserved short

1  
2  
3 258 gastric vessels and limited LAD of station 2 and 4sa), extended gastrectomy, and  
4  
5 259 distal gastrectomy with Billroth I or II reconstruction are not allowed. Reconstruction  
6  
7 260 can be of any form including Roux-Y reconstruction, interposition, or pouch  
8  
9  
10 261 reconstruction. Any other step of the procedure such as antibiotic prophylaxis,  
11  
12 262 placement of abdominal drains, and closure of the abdominal wall can be performed  
13  
14 263 according to in-house standards. D2 LAD is defined according to the Japanese  
15  
16 264 classification [35], with stations 1, 2, 3a, 3b, 4sa, 4sb, 4d, 5, 6, 7, 8a, 9, 11p, 11d, and  
17  
18 265 12a obligatory for the MEGA trial (**Figure 2**). Station 10 is optional. Incomplete LAD  
19  
20 266 is not allowed and has to be documented as a protocol deviation.  
21  
22  
23 267 Removal of further stations (8b, 12b, 12p, 13, 14v, 14a, 15, 16a1, 16a2, 16b1, 16b2,  
24  
25 268 17, 18, 19, 20, 110, 111, and 112) is allowed when deemed appropriate, e.g., in case  
26  
27 269 of assumed tumor invasion, and has to be documented as D2+.  
28  
29  
30  
31 270  
32

### 33 271 **Postoperative management**

34  
35 272 Postoperative management should be performed in a fast-track approach with short  
36  
37 273 durations until patient mobilization, drainage removal, and first oralization of food.  
38  
39 274 The patient should be extubated immediately after surgery and transferred to a  
40  
41 275 normal ward, if possible. Further specifications for the postoperative course will be  
42  
43 276 outlined in the provided standard operating procedure (SOP) for fast-track  
44  
45 277 gastrectomy. The last in-hospital trial visit takes place on the day of discharge.  
46  
47 278 Subsequent trial visits will be conducted via telephone. These will be questionnaire-  
48  
49 279 based and focus on CCI (until POD 90), quality of life, and oncologic outcome.  
50  
51  
52  
53 280  
54  
55

### 56 281 **Randomization and blinding**

57  
58 282 In order to ensure equal distribution of patient characteristics between both trial arms,  
59  
60 283 randomization will be performed using a web-based randomization tool

1  
2  
3 284 ([www.randomizer.at](http://www.randomizer.at)). Randomization will take place following diagnostic laparoscopy  
4  
5 285 (Visit 2). The allocation pattern is masked, block-randomized with variable block  
6  
7 286 length, and stratified across centers. Due to the pragmatic character of the trial,  
8  
9  
10 287 blinding of the surgeon is not feasible.  
11

12 288

## 14 289 **Quality assurance and quality management**

### 16 290 **Clinical data monitoring**

17  
18  
19 291 Clinical monitoring will be performed by independent monitors at the Study Center of  
20  
21 292 the German Society of Surgery (SDGC). The monitoring strategy will comprise a  
22  
23 293 combination of centralized and onsite monitoring and will be described in a trial  
24  
25 294 specific monitoring plan. To confirm site selection, pre-study visits will be performed.  
26  
27  
28 295 On-site monitoring will focus on patient informed consent, safety, and surgical  
29  
30 296 procedures as well as the correct recording and documentation of the primary and  
31  
32  
33 297 secondary endpoints by source data verification (SDV).  
34

35 298

### 37 299 **Surgical quality control**

38  
39  
40 300 Several steps are necessary to ensure and evaluate surgical quality:

- 41  
42 301 1) Trial surgeons must have performed 20 surgeries in the respective approach  
43  
44 302 (OG, LAG, or RAG), depending on the trial arm they will contribute to.
- 45  
46 303 2) Each trial surgeon must provide photographic or video documentation of a  
47  
48 304 former procedure.
- 49  
50 305 3) Each trial surgeon has to provide photographic or video documentation of the  
51  
52 306 trial procedures, which will be assessed by an expert. This photographic or  
53  
54 307 video documentation is defined as follows:
  - 55  
56 308 a. lymph node station 7 (left gastric artery) after dissection
  - 57  
58 309 b. lymph node station 8a (common hepatic artery) after dissection

- 1  
2  
3 310 c. lymph node station 9 (celiac artery) after dissection  
4  
5 311 d. lymph node station 10 (splenic hilum) after dissection  
6  
7 312 e. lymph node station 11p (proximal splenic artery) after dissection  
8  
9 313 f. lymph node station 11d (distal splenic artery) after dissection  
10  
11 314 g. lymph node station 12a (hepatoduodenal ligament along the hepatic  
12  
13 315 artery) after dissection  
14  
15 316 h. duodenal stump  
16  
17 317 i. all anastomoses  
18  
19 318 j. incision for specimen retrieval in MIG  
20  
21  
22  
23  
24  
25

### 320 **Assessment of safety**

321 Since the primary endpoint is postoperative complications as measured by the CCI,  
322 adverse (AE) and serious adverse events (SAE) are already captured and no  
323 additional safety analysis will be performed (**Table 2**).  
324

325 **Table 2: Grading of Adverse Events**

| Clavien-Dindo          | Adverse event (AE) | Serious adverse event (SAE) | Minor complication | Major complication |
|------------------------|--------------------|-----------------------------|--------------------|--------------------|
| Grade I complication   | AE                 |                             | Minor complication |                    |
| Grade II complication  |                    |                             |                    |                    |
| Grade III complication |                    |                             |                    |                    |
| Grade IV complication  |                    | SAE                         |                    | Major complication |
| Grade V complication   |                    |                             |                    |                    |

326

327

## 328 **Data management**

329 The Institute of Medical Biometry (IMBI) is responsible for data management within  
330 this trial. An eCRF will be used for data collection. To assure safe and secure data  
331 use and storage, data transmission is encrypted with secure socket layer (SSL)  
332 technology. Only authorized users are able to enter or edit data, and access is further  
333 restricted to data of the patients in that user's respective center only. All changes to  
334 data are logged with a computerized timestamp in an audit trail. All data will be  
335 pseudonymized. To guarantee high data quality, data validation rules will be defined  
336 in a data validation plan. Completeness, validity, and plausibility of data will be  
337 checked at the time of data entry (edit-checks) and using validating programs, which  
338 will generate queries. If no further corrections are to be made in the database, eCRF  
339 data will be locked. Data will finally be downloaded and used for statistical analysis.  
340 All data management procedures will be conducted according to written defined  
341 standard operating procedures (SOPs) of the IMBI that guarantee efficient conduct in  
342 compliance with Good Clinical Practice (GCP). At the end of the study, the data will  
343 be transformed into different data formats (e.g., csv-files) for archiving and to ensure  
344 that it can be re-used.

345

346

## 347 **Statistical methods**

### 348 **Sample size**

349 The sample size calculation is based on the primary endpoint "postoperative  
350 morbidity as measured with the CCI until POD 30." A decrease of the CCI by 10  
351 points between OG and MIG is considered relevant by patients and clinicians, and a  
352 conservative standard deviation of 20 is assumed based on existing literature for

1  
2  
3 353 upper GI surgery [36], leading to an effect size of  $d=0.5$ . Based on a t-test with a two-  
4  
5 354 sided significance level of  $\alpha=0.05$ , a sample size of  $n=128$  patients (64 per group)  
6  
7  
8 355 has to be recruited to achieve a power of 80%. The primary endpoint will be analyzed  
9  
10 356 with a linear mixed regression model, which leads to equal or even increased power  
11  
12 357 when compared to a two-sided t-test. To compensate for drop-outs and patients lost  
13  
14 358 to follow-up, a further 20% of patients will be randomized, leading to a total sample  
15  
16  
17 359 size of  $n=160$  (80 per group;  $80 \times 0,8 = 64.8$ ). The number of patients to be screened  
18  
19 360 ( $n=400$  to be assessed for eligibility;  $400 \times 0.5 \times 0.8 = 160$ ) was calculated with an  
20  
21 361 assumed 50% participation rate and an exclusion rate of 20%.

22  
23  
24 362 Randomized & allocated (n = 160; 80 per group)

25  
26 363 Intention-to-treat dataset (n = 160; 80 per group)

27  
28 364 Per-protocol dataset (n = 136; 72 and 64)

29  
30  
31 365

### 32 33 366 **Statistical analysis**

34  
35 367 For the examination of the primary endpoint “postoperative morbidity measured with  
36  
37 368 the CCI until POD 30,” the hypotheses to be assessed in the primary analysis are as  
38  
39  
40 369 follows:  $H_0: \mu_1 = \mu_2$  vs  $H_1: \mu_1 \neq \mu_2$ , where  $\mu_1$  and  $\mu_2$  denote the mean CCI in the  
41  
42 370 control and intervention groups, respectively. The significance level is set to a two-  
43  
44 371 sided  $\alpha=0.05$ . Therefore, the primary endpoint will be examined using a linear mixed  
45  
46  
47 372 model adjusting for the variables age and treatment group, as well as the surgical  
48  
49 373 center as a random effect (due to the stratified randomization and relatively large  
50  
51 374 number of centers in relation to the sample size, inclusion of center as a random  
52  
53 375 effect is recommended). Details of the primary model (e.g., handling of missing  
54  
55 376 values, sensitivity analyses) will be fully described in the statistical analysis plan.

56  
57  
58 377 The number of patients included in the primary analysis is determined as the full  
59  
60 378 analysis set. Patients will be analyzed in the group they were randomized to

1  
2  
3 379 (converted patients remain in their group). This reflects an analysis according to the  
4  
5 380 intention to treat (ITT) principle. Specific events (e.g., death) that can occur after  
6  
7 381 randomization will be handled within the primary endpoint definition, reflecting a  
8  
9 382 composite strategy [according to the ICH E9 (R1) addendum]. Other post  
10  
11 383 randomization events will not be considered. This choice reflects our treatment policy  
12  
13 384 approach.

14  
15  
16 385 In general, for the full analysis set, all baseline values and secondary outcomes will  
17  
18 386 be evaluated descriptively, with p-values reported alongside 95% confidence  
19  
20 387 intervals for the corresponding effects. Furthermore, secondary endpoints will be  
21  
22 388 evaluated descriptively, using appropriate regression models. Time-to-event  
23  
24 389 endpoints will be evaluated by methods of survival analysis including Kaplan-Meier  
25  
26 390 methods and Cox proportional hazards models. In addition, subgroup analyses  
27  
28 391 (including age, gender, tumor stage, tumor grade, histological tumor type, linear vs.  
29  
30 392 circular stapler for proximal anastomosis, linear vs. hand-sewn for distal  
31  
32 393 anastomosis, type of retrieval incision, and intraoperative conversion) will be carried  
33  
34 394 out. A detailed and comprehensive statistical analysis plan will be written shortly after  
35  
36 395 the first patient is recruited. All analyses will be performed using SAS version 9.4 or  
37  
38 396 higher.

39  
40  
41  
42  
43 397

44  
45  
46 398

## 47 399 **Discussion**

48  
49 400 We performed a systematic literature search prior to planning this trial and identified  
50  
51 401 974 publications. Of those, 17 RCTs comparing LAG with OG [7, 37-55] and two  
52  
53 402 RCTs comparing RAG with OG [56, 57] were found to be relevant. The studies  
54  
55 403 showed comparable oncologic and short-term postoperative outcomes for MIG and  
56  
57 404 OG. However, 16 of the 19 studies were conducted in China, Korea, and Japan [7,

1  
2  
3 405 38-50, 56, 57]. These countries have a significantly higher incidence of gastric  
4  
5 406 cancer, which consequently leads to significantly higher surgical volume and  
6  
7 407 expertise among the participating centers [58]. In addition, the body constitution of  
8  
9 408 Asian patients is often different from that of Western patients, which limits the direct  
10  
11 409 transferability of study results. Also, the incidence of gastric cancer is lower in  
12  
13 410 Western populations and advanced disease stages are more frequently detected,  
14  
15 411 because screening is less common. Therefore, it is unclear whether these results  
16  
17 412 would be reproducible in a Western population.

18  
19 413 Currently, there have only been three non-Asian RCTs directly comparing LAG and  
20  
21 414 OG. The first RCT, by Huscher et al., focused exclusively on distal gastrectomy, did  
22  
23 415 not define any specific primary or secondary endpoints, and included a total of 59  
24  
25 416 patients [37]. Due to the missing differentiation between primary and secondary  
26  
27 417 endpoints, the trial can be perceived as methodically limited and was most likely  
28  
29 418 underpowered. However, no significant difference was found in perioperative  
30  
31 419 outcome, oncologic outcome, or mortality [morbidity rates: 26.7% (LAG) and 27.6%  
32  
33 420 (OG), lymph nodes harvested:  $30.0 \pm 14.9$  (LAG) and  $33.4 \pm 17.4$  (OG), operative  
34  
35 421 mortality rates: 3.3% (LAG) and 6.7% (OG), 5-year survival rate: 54.8% (LAG) and  
36  
37 422 55.7% (OG)].

38  
39 423 The only two currently existing relevant Western multicenter RCTs comparing open  
40  
41 424 versus minimally invasive oncologic total gastrectomy are the LOGICA trial [52, 53]  
42  
43 425 and the STOMACH trial [51, 54, 55], which were both published in 2021.

44  
45 426 The LOGICA trial is a non-blinded, multicenter superiority trial with 227 patients with  
46  
47 427 postoperative hospital stay as the primary endpoint. The study identified significant  
48  
49 428 differences regarding blood loss [150 ml (LAG) and 300 ml (OG),  $p < 0.001$ ] and  
50  
51 429 operating time [216 min (LAG) and 182 min (OG),  $p < 0.001$ ], but no significant  
52  
53 430 differences in hospital stay ( $p = 0.34$ ), postoperative complications [44% (LAG) and



1  
2  
3 431 42% (OG), p=0.91], in-hospital mortality [4% (LAG) and 7% (OG), p=0.40], R0  
4  
5 432 resections [95% (LAG) and 95% (OG), p=1.00], median lymph node yield [29 (LAG)  
6  
7 433 and 29 (OG), p=0.49], 1-year overall survival [76% (LAG) and 78% (OG), p=0.74],  
8  
9 434 and health-related quality of life [+1.5 (LAG) and +3.6 (OG) on a 1-100 scale].

10 435 The STOMACH trial is an observer-blinded, multicenter, non-inferiority trial with 96  
11  
12 436 patients following neoadjuvant chemotherapy with quality of oncological resection  
13  
14 437 (radicality of surgery and number of retrieved lymph nodes) as the primary endpoint.  
15  
16 438 Mean number of resected lymph nodes [41.7±16.1 (LAG) and 43.4±17.3 (OG),  
17  
18 439 p=0.612], number of R0 resections (44/47 (LAG) and 48/49 (OG), p=0.617], 1-year  
19  
20 440 survival (85.5% (LAG) and 90.4% (OG), p=0.701], postoperative complications  
21  
22 441 [16/47 (LAG) and 21/49 (OG), p=0.408], and postoperative QoL [measured with  
23  
24 442 EQ5D, EORTC-QLQ-C30, and EORTC-QLQ-STO22] were not significantly different.

25  
26 443 In a regular setting with a diagnosed carcinoma, patients should usually be advised  
27  
28 444 to make their decision for or against a certain treatment option with regards to a  
29  
30 445 combination of highest expected overall survival and simultaneous conservation of  
31  
32 446 long-term QoL. Short-term postoperative complications should only be treated as  
33  
34 447 secondary deciding factors. However, if postoperative complications might impair  
35  
36 448 long-term QoL or even overall survival, they become equally relevant. In general,  
37  
38 449 postoperative complications can have negative effects on QoL or overall survival;  
39  
40 450 however, this is much more the case for gastric cancer, as time to continuation of  
41  
42 451 peroperative chemotherapy can be prolonged and the prognosis therefore worsened.

43  
44 452 The STOMACH trial provides evidence that MIG is non-inferior to OG in terms of  
45  
46 453 oncologic quality of resection, which is a necessary requirement for the MEGA trial,  
47  
48 454 as postoperative morbidity and complications can only be decisive factors in the case  
49  
50 455 of oncological non-inferiority for an oncological resection with curative intent.  
51  
52  
53  
54  
55  
56  
57  
58  
59  
60

1  
2  
3 456 While both the STOMACH and LOGICA trials suggest that postoperative  
4  
5 457 complications might not be significantly different between both groups, a premature  
6  
7 458 confirmative statement must be avoided as complications have only been  
8  
9 459 investigated as secondary endpoints so far. Consequently, a multicenter RCT  
10  
11 460 comparing total MIG and OG for gastric cancer in terms of postoperative  
12  
13 461 complications is needed to decide whether MIG should be established as the new  
14  
15 462 standard treatment for resectable gastric cancer in Europe.

16  
17 463 The MEGA trial has strict quality control measures and will be conducted in line with  
18  
19 464 all relevant guidelines. Therefore, it will provide the highest level of evidence on this  
20  
21 465 very relevant clinical research question.  
22  
23  
24  
25

26 466

### 27 28 467 **Ethics and dissemination**

29  
30 468 The MEGA trial conforms to the Declaration of Helsinki [59]. The Independent Ethics  
31  
32 469 Committee of the Medical Faculty, University of Heidelberg, approved the MEGA trial  
33  
34 470 protocol (registration number S-816/2021). For other trial centers, recruitment will  
35  
36 471 only be initiated after receiving approval from their respective local ethics  
37  
38 472 committees. Study objectives and procedures will be communicated clearly to all  
39  
40 473 qualifying patients and written informed consent will be obtained from those who  
41  
42 474 agree to participate. Results will be presented at scientific meetings and published in  
43  
44 475 international peer-reviewed journals. Summaries will be provided to the funders of  
45  
46 476 the study and results will be published in open-access journals.  
47  
48  
49  
50

51 477

### 52 53 478 **Patient and Public Involvement**

54  
55 479 Patients are involved in the design and conduction of this trial. Priority of the research  
56  
57 480 question, outcome measures, and recruitment methods were discussed with patients  
58  
59 481 during the initial planning stage. Patients have stated an uneventful postoperative  
60

482 course as a very notable feature, and every possible intervention contributing to  
483 lower postoperative morbidity was rated to be of great importance.

484 The chairman of one of Germany's largest patient self-aid groups concerning  
485 minimally invasive surgery (SHG Frankfurt Sachsenhausen) will be a member of the  
486 data safety and monitoring board as a patient representative. Therefore, this study  
487 will continue to take the patient's perspective into account.

488

### 489 **Modification of the protocol**

490 The current protocol version (1.2) will be utilized during trial initiation. In case of  
491 protocol amendments, these will be submitted to the relevant ethics committees for  
492 approval.

493

### 494 **Additional file**

495 Additional file 1: SPIRIT checklist.

496

### 497 **Abbreviations**

|            |                                                                            |
|------------|----------------------------------------------------------------------------|
| ADLs       | Activities of daily living                                                 |
| AE         | Adverse event                                                              |
| AEG        | Adenocarcinoma of esophagogastric junction                                 |
| ASA        | American Society of Anesthesiologists Classification                       |
| BIS        | Body Image Scale                                                           |
| BMBF       | Federal Ministry of Education and Research                                 |
| CA         | Carbohydrate antigen                                                       |
| CEA        | Carcinoembryonic antigen                                                   |
| CCI        | Comprehensive Complication Index according to Clavien-Dindo classification |
| eCRF       | Electronic Case Report Forms                                               |
| CRP        | C-reactive protein                                                         |
| DALY       | Disability-adjusted life years                                             |
| DRKS       | Deutsches Register Klinischer Studien (German Clinical Trials Register)    |
| DSMB       | Data Safety and Monitoring Board                                           |
| EORTC QLQ- | European Organisation for Research and Treatment of Cancer Quality of Life |

|                  |                                                                                                             |
|------------------|-------------------------------------------------------------------------------------------------------------|
| C30              | Questionnaire Core 30                                                                                       |
| EORTC QLQ-STO22  | European Organisation for Research and Treatment of Cancer Quality of Life Questionnaire for Gastric Cancer |
| EUROQOL EQ-5D-5L | EuroQol Group Questionnaire for Quality of Life with 5 dimensions and 5 levels                              |
| FPI              | First-patient-in                                                                                            |
| FU               | Follow-up                                                                                                   |
| GCP              | Good Clinical Practice                                                                                      |
| ICH              | International Council for Harmonisation of Technical Requirements for Pharmaceuticals for Human Use         |
| ICU              | Intermediate / intensive care unit                                                                          |
| IMBI             | Institute of Medical Biometry                                                                               |
| ITT              | Intention-to-treat                                                                                          |
| LAG              | Laparoscopic gastrectomy                                                                                    |
| LPI              | Last-patient-in                                                                                             |
| LPO              | Last-patient-out                                                                                            |
| MIG              | Minimally invasive gastrectomy                                                                              |
| OG               | Open gastrectomy                                                                                            |
| POD              | Postoperative day                                                                                           |
| POM              | Postoperative month                                                                                         |
| PRO              | Patient-reported outcome                                                                                    |
| QoL              | Quality of life                                                                                             |
| QoR-15           | Quality of Recovery 15 questionnaire                                                                        |
| RAG              | Robotic-assisted gastrectomy                                                                                |
| RCT              | Randomized controlled trial                                                                                 |
| SAE              | Serious adverse event                                                                                       |
| SDGC             | Study Center of the German Society of Surgery                                                               |
| SDV              | Source data verification                                                                                    |
| SOP              | Standard operating procedure                                                                                |
| V                | Visit                                                                                                       |

498

## 499 **Acknowledgements**

500 The authors gratefully acknowledge the Study Center of the German Society of  
501 Surgery (SDGC) in the Department of General, Visceral, and Transplantation  
502 Surgery at Heidelberg University Hospital for its assistance in coordinating this RCT.  
503 We would also like to thank the other centers that have committed to participating in  
504 the trial.

1  
2  
3 505  
45 506 **Funding statement**

7 507 The MEGA trial is funded by the Federal Ministry of Education and Research  
8 (BMBF), funding number 01KG2029. All trial aspects will be performed independently  
9  
10 508 from the funding source, including trial design and conduction, analysis, and  
11  
12 509 interpretation of data, as well as submission of the report for publication. The funder  
13  
14 510 does not have any influence in study design or collection, management, analysis,  
15  
16 511 and interpretation of data.  
17  
18 512  
19  
20  
21  
22

23 513

24 514 **Authors' contributions**

25  
26 515 BPMS, FN and ASF developed the original concept of the trial and applied for  
27  
28 516 funding. FN, ASF, DH, CK, MF, SZ and BPMS developed the design and  
29  
30 517 methodology. BPMS and FN recruited all participating trial centers. FN, ASF, CK,  
31  
32 518 MF, SZ and BPMS performed initial statistical steps to develop the analysis plan. FN,  
33  
34 519 ASF, RK, SVA, ST, PP, AB and HN contributed to drafting the protocol. DH, CK, MF,  
35  
36 520 SZ, BB, FB, CB, IG, SG, PG, CG, JH, KL, LM, SM, DR, FS, DS, PP, TS and BPMS  
37  
38 521 contributed to the revision of the final protocol. All authors have read and approved of  
39  
40 522 the final manuscript.  
41  
42  
43  
44  
45

46 523

47 524

48  
49 525 **Responsibilities**

50  
51 526 Prof. Dr. Müller-Stich, Coordinating Investigator, is involved in every aspect of the  
52  
53 527 trial and has ultimate authority over study design, data collection, interpretation of  
54  
55 528 data, and oversight of the intermittent and final written reports. PD Dr. Nickel, MME,  
56  
57 529 is Deputy Coordinating Investigator. Alexander Studier-Fischer, MD, is Trial  
58  
59 530 Organizer. The Clinical Trial Committee consists of the Coordinating Investigator, the  
60

1  
2  
3 531 Deputy Coordinating Investigator, and the Trial Organizer, originating from the  
4  
5 532 Division of Minimally Invasive and Robotic-assisted Surgery in the Department of  
6  
7 533 General, Visceral, and Transplantation Surgery at Heidelberg University Hospital. To  
8  
9  
10 534 ensure objectivity, the third-party Institute of Medical Biometry (IMBI) is responsible  
11  
12 535 for data management, statistical planning, and analysis. Project management and  
13  
14 536 monitoring are handled by the SDGC (Study Center of the German Society of  
15  
16 537 Surgery), in Heidelberg. Additionally, a Data Safety and Monitoring Board (DSMB)  
17  
18 538 consisting of independent experts will advise on the continuation, modification, or  
19  
20 539 termination of the trial and a steering committee will supervise the conduction of the  
21  
22 540 trial and make decisions based on DSMB recommendations.  
23  
24  
25

26 541

#### 27 28 542 **Data availability**

29  
30 543 The full protocol, results and statistical code will be made available by the  
31  
32 544 corresponding authors upon reasonable request.  
33  
34

35 545

#### 36 37 546 **Conflict of interest statements**

38  
39 547 The authors declare that they have no conflicts of interest or relevant financial ties to  
40  
41 548 disclose. Felix Nickel reports support for courses and travel from Johnson and  
42  
43 549 Johnson, Medtronic, Intuitive Surgical, Cambridge Medical Robotics, and KARL  
44  
45 550 STORZ as well as consultancy fees from KARL STORZ.  
46  
47  
48

49 551

#### 50 51 552 **References**

52  
53 553 1. Bray, F., et al., *Global cancer statistics 2018: GLOBOCAN estimates of*  
54  
55 554 *incidence and mortality worldwide for 36 cancers in 185 countries*. CA Cancer J Clin,  
56  
57 555 2018. **68**(6): p. 394-424.  
58  
59  
60

- 1  
2  
3 556 2. Soerjomataram, I., et al., *Global burden of cancer in 2008: a systematic*  
4  
5 557 *analysis of disability-adjusted life-years in 12 world regions*. *Lancet*, 2012. **380**(9856):  
6  
7 558 p. 1840-50.
- 8  
9  
10 559 3. Fitzmaurice, C., et al., *Global, Regional, and National Cancer Incidence,*  
11  
12 560 *Mortality, Years of Life Lost, Years Lived With Disability, and Disability-Adjusted Life-*  
13  
14 561 *years for 32 Cancer Groups, 1990 to 2015: A Systematic Analysis for the Global*  
15  
16 562 *Burden of Disease Study*. *JAMA Oncol*, 2017. **3**(4): p. 524-548.
- 17  
18  
19 563 4. Selby, L.V., et al., *Morbidity after Total Gastrectomy: Analysis of 238 Patients*.  
20  
21 564 *Journal of the American College of Surgeons*, 2015. **220**(5): p. 863-871.e2.
- 22  
23  
24 565 5. Karimi, P., et al., *Gastric cancer: descriptive epidemiology, risk factors,*  
25  
26 566 *screening, and prevention*. *Cancer Epidemiol Biomarkers Prev*, 2014. **23**(5): p. 700-  
27  
28 567 13.
- 29  
30  
31 568 6. Van Cutsem, E., et al., *Gastric cancer*. *Lancet*, 2016. **388**(10060): p. 2654-  
32  
33 569 2664.
- 34  
35 570 7. Kim, W., et al., *Decreased Morbidity of Laparoscopic Distal Gastrectomy*  
36  
37 571 *Compared With Open Distal Gastrectomy for Stage I Gastric Cancer: Short-term*  
38  
39 572 *Outcomes From a Multicenter Randomized Controlled Trial (KLASS-01)*. *Ann Surg*,  
40  
41 573 2016. **263**(1): p. 28-35.
- 42  
43  
44 574 8. Fuchs, H., et al., *Operative Fallzahlen beeinflussen die Mortalität nach*  
45  
46 575 *Gastrektomie erheblich – eine Analyse des U.S. Nationwide Inpatient Sample*.  
47  
48  
49 576 9. Pacelli, F., et al., *Four hundred consecutive total gastrectomies for gastric*  
50  
51 577 *cancer: a single-institution experience*. *Arch Surg*, 2008. **143**(8): p. 769-75;  
52  
53 578 discussion 775.
- 54  
55  
56 579 10. Bartlett, E.K., et al., *Morbidity and mortality after total gastrectomy for gastric*  
57  
58 580 *malignancy using the American College of Surgeons National Surgical Quality*  
59  
60 581 *Improvement Program database*. *Surgery*, 2014. **156**(2): p. 298-304.



- 1  
2  
3 582 11. Papenfuss, W.A., et al., *Morbidity and mortality associated with gastrectomy*  
4  
5 583 *for gastric cancer*. *Ann Surg Oncol*, 2014. **21**(9): p. 3008-14.  
6  
7 584 12. Dhir, M., et al., *A preoperative nomogram to predict the risk of perioperative*  
8  
9 585 *mortality following gastric resections for malignancy*. *J Gastrointest Surg*, 2012.  
10  
11 586 **16**(11): p. 2026-36.  
12  
13 587 13. Edwards, P., et al., *Prospective comparison of D1 vs modified D2 gastrectomy*  
14  
15 588 *for carcinoma*. *Br J Cancer*, 2004. **90**(10): p. 1888-92.  
16  
17 589 14. Finlayson, E.V., P.P. Goodney, and J.D. Birkmeyer, *Hospital volume and*  
18  
19 590 *operative mortality in cancer surgery: a national study*. *Arch Surg*, 2003. **138**(7): p.  
20  
21 591 721-5; discussion 726.  
22  
23 592 15. Smith, J.W., et al., *Morbidity of radical lymphadenectomy in the curative*  
24  
25 593 *resection of gastric carcinoma*. *Arch Surg*, 1991. **126**(12): p. 1469-73.  
26  
27 594 16. Harrison, L.E., M.S. Karpeh, and M.F. Brennan, *Proximal gastric cancers*  
28  
29 595 *resected via a transabdominal-only approach. Results and comparisons to distal*  
30  
31 596 *adenocarcinoma of the stomach*. *Ann Surg*, 1997. **225**(6): p. 678-83; discussion 683-  
32  
33 597 5.  
34  
35 598 17. Noguchi, Y., et al., *Is gastric carcinoma different between Japan and the*  
36  
37 599 *United States?* *Cancer*, 2000. **89**(11): p. 2237-46.  
38  
39 600 18. Li, H.Z., et al., *Laparoscopic-assisted versus open radical gastrectomy for*  
40  
41 601 *resectable gastric cancer: Systematic review, meta-analysis, and trial sequential*  
42  
43 602 *analysis of randomized controlled trials*. *J Surg Oncol*, 2016. **113**(7): p. 756-67.  
44  
45 603 19. Yamada, H., et al., *Effect of obesity on technical feasibility and postoperative*  
46  
47 604 *outcomes of laparoscopy-assisted distal gastrectomy--comparison with open distal*  
48  
49 605 *gastrectomy*. *J Gastrointest Surg*, 2008. **12**(6): p. 997-1004.  
50  
51  
52  
53  
54  
55  
56  
57  
58  
59  
60



- 1  
2  
3 606 20. Lacy, A.M., et al., *Laparoscopy-assisted colectomy versus open colectomy for*  
4  
5 607 *treatment of non-metastatic colon cancer: a randomised trial*. Lancet, 2002.  
6  
7 608 **359**(9325): p. 2224-9.
- 9  
10 609 21. van der Pas, M.H., et al., *Laparoscopic versus open surgery for rectal cancer*  
11  
12 610 *(COLOR II): short-term outcomes of a randomised, phase 3 trial*. Lancet Oncol, 2013.  
13  
14 611 **14**(3): p. 210-8.
- 16 612 22. Müller-Stich, B.P., et al., *Meta-analysis of randomized controlled trials and*  
17  
18 613 *individual patient data comparing minimally invasive with open oesophagectomy for*  
19  
20 614 *cancer*. British Journal of Surgery, 2021.
- 23  
24 615 23. Lee, H.J., et al., *Short-term Outcomes of a Multicenter Randomized Controlled*  
25  
26 616 *Trial Comparing Laparoscopic Distal Gastrectomy With D2 Lymphadenectomy to*  
27  
28 617 *Open Distal Gastrectomy for Locally Advanced Gastric Cancer (KLASS-02-RCT)*.  
29  
30 618 Ann Surg, 2019. **270**(6): p. 983-991.
- 32  
33 619 24. Jaschinski, T., et al., *Laparoscopic versus open surgery for suspected*  
34  
35 620 *appendicitis*. Cochrane Database Syst Rev, 2018. **11**(11): p. Cd001546.
- 37  
38 621 25. Law, W.L., et al., *The Impact of Postoperative Complications on Long-Term*  
39  
40 622 *Outcomes Following Curative Resection for Colorectal Cancer*. Annals of Surgical  
41  
42 623 Oncology, 2007. **14**(9): p. 2559-2566.
- 44  
45 624 26. Chok, K.S., et al., *Impact of postoperative complications on long-term outcome*  
46  
47 625 *of curative resection for hepatocellular carcinoma*. British Journal of Surgery, 2008.  
48  
49 626 **96**(1): p. 81-87.
- 51  
52 627 27. Kamphues, C., et al., *Postoperative Complications Deteriorate Long-Term*  
53  
54 628 *Outcome in Pancreatic Cancer Patients*. Annals of Surgical Oncology, 2012. **19**(3): p.  
55  
56 629 856-863.  
57  
58  
59  
60

- 1  
2  
3 630 28. Li, Q.-G., et al., *Impact of postoperative complications on long-term survival*  
4  
5 631 *after radical resection for gastric cancer*. World journal of gastroenterology, 2013.  
6  
7 632 **19**(25): p. 4060-4065.  
8  
9  
10 633 29. *DRKS Trial document*. Accessed 8th of April 2020.  
11  
12 634 [https://www.drks.de/drks\\_web/navigate.do?navigationId=trial.HTML&TRIAL\\_ID=DRK](https://www.drks.de/drks_web/navigate.do?navigationId=trial.HTML&TRIAL_ID=DRK)  
13  
14 635 [S00016773](https://www.drks.de/drks_web/navigate.do?navigationId=trial.HTML&TRIAL_ID=DRKS00016773).  
15  
16  
17 636 30. Chan, A.W., et al., *SPIRIT 2013 Statement: defining standard protocol items*  
18  
19 637 *for clinical trials*. Rev Panam Salud Publica, 2015. **38**(6): p. 506-14.  
20  
21 638 31. Slankamenac, K., et al., *The Comprehensive Complication Index: A Novel and*  
22  
23 639 *More Sensitive Endpoint for Assessing Outcome and Reducing Sample Size in*  
24  
25 640 *Randomized Controlled Trials*. Annals of Surgery, 2014. **260**(5): p. 757-763.  
26  
27  
28 641 32. Slankamenac, K., et al., *The comprehensive complication index: a novel*  
29  
30 642 *continuous scale to measure surgical morbidity*. Ann Surg, 2013. **258**(1): p. 1-7.  
31  
32  
33 643 33. Nickel, F., et al., *Minimally Invasive Versus open AbdominoThoracic*  
34  
35 644 *Esophagectomy for esophageal carcinoma (MIVATE) - study protocol for a*  
36  
37 645 *randomized controlled trial DRKS00016773*. Trials, 2021. **22**(1): p. 41.  
38  
39  
40 646 34. Dindo, D., N. Demartines, and P.-A. Clavien, *Classification of surgical*  
41  
42 647 *complications: a new proposal with evaluation in a cohort of 6336 patients and*  
43  
44 648 *results of a survey*. Annals of surgery, 2004. **240**(2): p. 205-213.  
45  
46  
47 649 35. Japanese Gastric Cancer, A., *Japanese classification of gastric carcinoma:*  
48  
49 650 *3rd English edition*. Gastric Cancer, 2011. **14**(2): p. 101-112.  
50  
51  
52 651 36. Ma, G., et al., *Comparison of the short-term clinical outcome between open*  
53  
54 652 *and minimally invasive esophagectomy by comprehensive complication index*. J  
55  
56 653 *Cancer Res Ther*, 2018. **14**(4): p. 789-794.  
57  
58  
59  
60

- 1  
2  
3 654 37. Huscher, C.G., et al., *Laparoscopic versus open subtotal gastrectomy for*  
4  
5 655 *distal gastric cancer: five-year results of a randomized prospective trial.* Ann Surg,  
6  
7 656 2005. **241**(2): p. 232-7.
- 8  
9  
10 657 38. Cai, J., et al., *A prospective randomized study comparing open versus*  
11  
12 658 *laparoscopy-assisted D2 radical gastrectomy in advanced gastric cancer.* Dig Surg,  
13  
14 659 2011. **28**(5-6): p. 331-7.
- 15  
16  
17 660 39. Cui, M., et al., *A prospective randomized clinical trial comparing D2 dissection*  
18  
19 661 *in laparoscopic and open gastrectomy for gastric cancer.* Med Oncol, 2015. **32**(10):  
20  
21 662 p. 241.
- 22  
23  
24 663 40. Kitano, S., et al., *A randomized controlled trial comparing open vs*  
25  
26 664 *laparoscopy-assisted distal gastrectomy for the treatment of early gastric cancer: an*  
27  
28 665 *interim report.* Surgery, 2002. **131**(1 Suppl): p. S306-11.
- 29  
30  
31 666 41. Lee, J.H., H.S. Han, and J.H. Lee, *A prospective randomized study comparing*  
32  
33 667 *open vs laparoscopy-assisted distal gastrectomy in early gastric cancer: early results.*  
34  
35 668 Surg Endosc, 2005. **19**(2): p. 168-73.
- 36  
37  
38 669 42. Jiang, L., et al., *Laparoscopy-assisted gastrectomy versus open gastrectomy*  
39  
40 670 *for resectable gastric cancer: an update meta-analysis based on randomized*  
41  
42 671 *controlled trials.* Surg Endosc, 2013. **27**(7): p. 2466-80.
- 43  
44  
45 672 43. Kim, H.H., et al., *Prospective randomized controlled trial (phase III) to*  
46  
47 673 *comparing laparoscopic distal gastrectomy with open distal gastrectomy for gastric*  
48  
49 674 *adenocarcinoma (KLASS 01).* J Korean Surg Soc, 2013. **84**(2): p. 123-30.
- 50  
51  
52 675 44. Kim, Y.W., et al., *Long-term outcomes of laparoscopy-assisted distal*  
53  
54 676 *gastrectomy for early gastric cancer: result of a randomized controlled trial (COACT*  
55  
56 677 *0301).* Surg Endosc, 2013. **27**(11): p. 4267-76.  
57  
58  
59  
60

- 1  
2  
3 678 45. Yamashita, K., et al., *Laparoscopic versus open distal gastrectomy for early*  
4  
5 679 *gastric cancer in Japan: long-term clinical outcomes of a randomized clinical trial.*  
6  
7 680 *Surg Today*, 2016. **46**(6): p. 741-9.
- 8  
9  
10 681 46. Hyung, W.J., et al., *A feasibility study of laparoscopic total gastrectomy for*  
11  
12 682 *clinical stage I gastric cancer: a prospective multi-center phase II clinical trial, KLASS*  
13  
14 683 *03. Gastric Cancer*, 2019. **22**(1): p. 214-222.
- 15  
16  
17 684 47. Takiguchi, S., et al., *Laparoscopy-assisted distal gastrectomy versus open*  
18  
19 685 *distal gastrectomy. A prospective randomized single-blind study. World J Surg*, 2013.  
20  
21 686 **37**(10): p. 2379-86.
- 22  
23  
24 687 48. Wang, Z., et al., *Short-term surgical outcomes of laparoscopy-assisted versus*  
25  
26 688 *open D2 distal gastrectomy for locally advanced gastric cancer in North China: a*  
27  
28 689 *multicenter randomized controlled trial. Surg Endosc*, 2019. **33**(1): p. 33-45.
- 29  
30  
31 690 49. Hu, Y., et al., *Morbidity and Mortality of Laparoscopic Versus Open D2 Distal*  
32  
33 691 *Gastrectomy for Advanced Gastric Cancer: A Randomized Controlled Trial. J Clin*  
34  
35 692 *Oncol*, 2016. **34**(12): p. 1350-7.
- 36  
37  
38 693 50. Hayashi, H., et al., *Prospective randomized study of open versus laparoscopy-*  
39  
40 694 *assisted distal gastrectomy with extraperigastric lymph node dissection for early*  
41  
42 695 *gastric cancer. Surg Endosc*, 2005. **19**(9): p. 1172-6.
- 43  
44  
45 696 51. Straatman, J., et al., *Surgical techniques, open versus minimally invasive*  
46  
47 697 *gastrectomy after chemotherapy (STOMACH trial): study protocol for a randomized*  
48  
49 698 *controlled trial. Trials*, 2015. **16**: p. 123.
- 50  
51  
52 699 52. Haverkamp, L., et al., *Laparoscopic versus open gastrectomy for gastric*  
53  
54 700 *cancer, a multicenter prospectively randomized controlled trial (LOGICA-trial). BMC*  
55  
56 701 *Cancer*, 2015. **15**: p. 556.
- 57  
58  
59  
60

- 1  
2  
3 702 53. van der Veen, A., et al., *Laparoscopic Versus Open Gastrectomy for Gastric*  
4  
5 703 *Cancer (LOGICA): A Multicenter Randomized Clinical Trial*. J Clin Oncol, 2021.  
6  
7 704 **39**(9): p. 978-989.
- 8  
9  
10 705 54. van der Wielen, N., et al., *Open versus minimally invasive total gastrectomy*  
11  
12 706 *after neoadjuvant chemotherapy: results of a European randomized trial*. Gastric  
13  
14 707 Cancer, 2021. **24**(1): p. 258-271.
- 15  
16  
17 708 55. van der Wielen, N., et al., *Health related quality of life following open versus*  
18  
19 709 *minimally invasive total gastrectomy for cancer: Results from a randomized clinical*  
20  
21 710 *trial*. Eur J Surg Oncol, 2021.
- 22  
23  
24 711 56. Wang, G., et al., *Assessing the safety and efficacy of full robotic gastrectomy*  
25  
26 712 *with intracorporeal robot-sewn anastomosis for gastric cancer: A randomized clinical*  
27  
28 713 *trial*. J Surg Oncol, 2016. **113**(4): p. 397-404.
- 29  
30  
31 714 57. Ojima, T., et al., *Robotic versus laparoscopic gastrectomy with lymph node*  
32  
33 715 *dissection for gastric cancer: study protocol for a randomized controlled trial*. Trials,  
34  
35 716 2018. **19**(1): p. 409.
- 36  
37  
38 717 58. Memon, M.A. and B. Memon, *Laparoscopic D2 distal gastrectomy for*  
39  
40 718 *advanced gastric cancer: a myth or a reality?* Transl Gastroenterol Hepatol, 2016. **1**:  
41  
42 719 p. 39.
- 43  
44  
45 720 59. Association, W.M., *World Medical Association Declaration of Helsinki: Ethical*  
46  
47 721 *Principles for Medical Research Involving Human Subjects*. JAMA, 2013. **310**(20): p.  
48  
49 722 2191-2194.

723

724

725

726

1  
2  
3 727 **Figure 1 | Trial design flow chart.** \* Intraoperative conversion from MIG to OG, e.g.,  
4  
5 728 due to bleeding. \*\* Lost to follow-up over 30 postoperative days. Postoperative day  
6  
7 729 (POD), postoperative month (POM), intention-to-treat (ITT), per-protocol (PP).  
8  
9

10 730

11  
12 731 **Figure 2 | Schematic lymphadenectomy.** Stations for lymphadenectomy (LAD) as  
13  
14 732 required for total gastrectomy according to the cited Japanese classification.  
15  
16 733 Schemes are separated into D1 LAD, D2 LAD, and further lymph node stations.  
17  
18

19 734

20  
21 735  
22  
23  
24  
25  
26  
27  
28  
29  
30  
31  
32  
33  
34  
35  
36  
37  
38  
39  
40  
41  
42  
43  
44  
45  
46  
47  
48  
49  
50  
51  
52  
53  
54  
55  
56  
57  
58  
59  
60

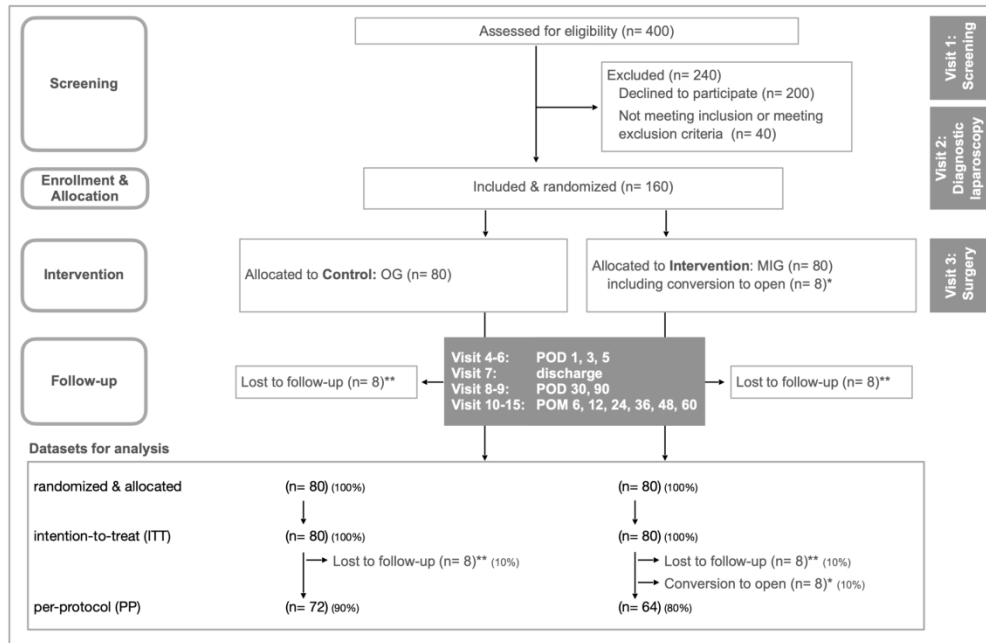

Figure 1 | Trial design flow chart. \* Intraoperative conversion from MIG to OG, e.g., due to bleeding. \*\* Lost to follow-up over 30 postoperative days. Postoperative day (POD), postoperative month (POM), intention-to-treat (ITT), per-protocol (PP).

200x129mm (300 x 300 DPI)

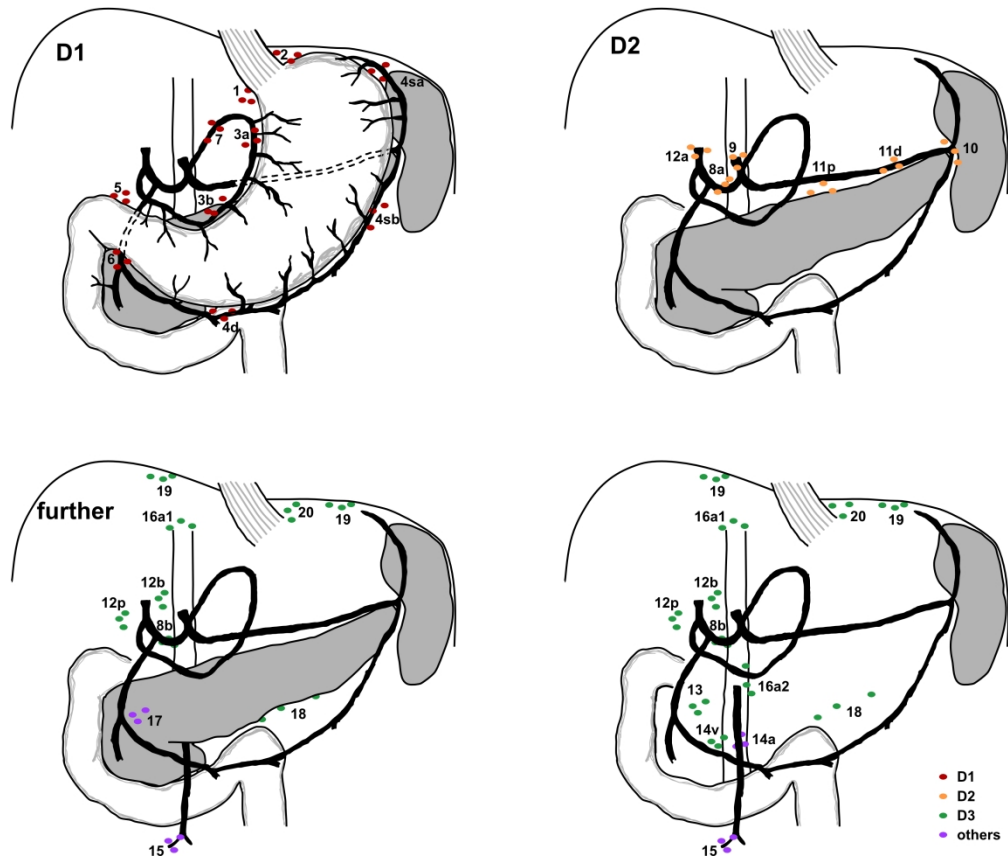

Figure 2 | Schematic lymphadenectomy. Stations for lymphadenectomy (LAD) as required for total gastrectomy according to the cited Japanese classification. Schemes are separated into D1 LAD, D2 LAD, and further lymph node stations.

295x250mm (300 x 300 DPI)



## Appendices

### Appendix 1: ECOG & KARNOFSKY Performance Status

| ECOG PERFORMANCE STATUS* ** |                                                                                                                                                           | KARNOFSKY PERFORMANCE STATUS*** |                                                                               |
|-----------------------------|-----------------------------------------------------------------------------------------------------------------------------------------------------------|---------------------------------|-------------------------------------------------------------------------------|
| GRADE                       | Description                                                                                                                                               | GRADE                           | Description                                                                   |
| 0                           | Fully active, able to carry on all pre-disease performance without restriction                                                                            | 100                             | Normal, no complaints; no evidence of disease                                 |
|                             |                                                                                                                                                           | 90                              | Able to carry on normal activity; minor signs or symptoms of disease          |
| 1                           | Restricted in physically strenuous activity but ambulatory and able to carry out work of a light or sedentary nature, e.g., light house work, office work | 80                              | Normal activity with effort, some signs or symptoms of disease                |
|                             |                                                                                                                                                           | 70                              | Cares for self but unable to carry on normal activity or to do active work    |
| 2                           | Ambulatory and capable of all selfcare but unable to carry out any work activities; up and about more than 50% of waking hours                            | 60                              | Requires occasional assistance but is able to care for most of personal needs |
|                             |                                                                                                                                                           | 50                              | Requires considerable assistance and frequent medical care                    |
| 3                           | Capable of only limited selfcare; confined to bed or chair more than 50% of waking hours                                                                  | 40                              | Disabled; requires special care and assistance                                |
|                             |                                                                                                                                                           | 30                              | Severely disabled; hospitalization is indicated although death not imminent   |
| 4                           | Completely disabled; cannot carry on any selfcare; totally confined to bed or chair                                                                       | 20                              | Very ill; hospitalization and active supportive care necessary                |
|                             |                                                                                                                                                           | 10                              | Moribund                                                                      |
| 5                           | Dead                                                                                                                                                      | 0                               | Dead                                                                          |

\*Zubrod C, et al. Appraisal of methods for the study of chemotherapy in man: Comparative therapeutic trial of nitrogen mustard and thiophosphoramide. *Journal of Chronic Diseases*; 1960:11:7-33.

\*\*Oken M, Creech R, Tormey D, et al. Toxicity and response criteria of the Eastern Cooperative Oncology Group. *Am J Clin Oncol*. 1982;5:649-655.

\*\*\*Karnofsky D, Burchenal J, The clinical evaluation of chemotherapeutic agents in cancer. In: MacLeod C, ed. *Evaluation of Chemotherapeutic Agents*. New York, NY: Columbia University Press; 1949:191-205.

<https://ecog-acrin.org/resources/ecog-performance-status>

## 13 Appendix 2: Documentation of lymphadenectomy during total gastrectomy

| Japanese classification of gastric carcinoma: 3rd English edition Gastric Cancer (2011) 14:101–112 |                                                      |                                                                                                                                                                                                                                        | D2 Lymphadenectomy completed lymphadenectomy = <input type="checkbox"/> |
|----------------------------------------------------------------------------------------------------|------------------------------------------------------|----------------------------------------------------------------------------------------------------------------------------------------------------------------------------------------------------------------------------------------|-------------------------------------------------------------------------|
| No.                                                                                                | Location                                             |                                                                                                                                                                                                                                        |                                                                         |
| 1*                                                                                                 | Right paracardial                                    | Right paracardial LNs, including those along the first branch of the ascending limb of the left gastric artery.                                                                                                                        | <input type="checkbox"/>                                                |
| 2*                                                                                                 | Left paracardial                                     | Left paracardial LNs including those along the esophagocardiac branch of the left subphrenic artery                                                                                                                                    | <input type="checkbox"/>                                                |
| 3a*                                                                                                | Left gastric vessel                                  | Lesser curvature LNs along the branches of the left gastric artery                                                                                                                                                                     | <input type="checkbox"/>                                                |
| 3b*                                                                                                | Right gastric vessel                                 | Lesser curvature LNs along the 2nd branch and distal part of the right gastric artery                                                                                                                                                  | <input type="checkbox"/>                                                |
| 4sa*                                                                                               | Short gastric vessel                                 | Left greater curvature LNs along the short gastric arteries (perigastric area)                                                                                                                                                         | <input type="checkbox"/>                                                |
| 4sb*                                                                                               | Left gastroepiploic                                  | Left greater curvature LNs along the left gastroepiploic artery (perigastric area)                                                                                                                                                     | <input type="checkbox"/>                                                |
| 4d*                                                                                                | Right gastroepiploic                                 | Right greater curvature LNs along the 2nd branch and distal part of the right gastroepiploic artery                                                                                                                                    | <input type="checkbox"/>                                                |
| 5*                                                                                                 | Suprapyloric                                         | Suprapyloric LNs along the 1st branch and proximal part of the right gastric artery                                                                                                                                                    | <input type="checkbox"/>                                                |
| 6*                                                                                                 | Infrapyloric                                         | Infrapyloric LNs along the first branch and proximal part of the right gastroepiploic artery down to the confluence of the right gastroepiploic vein and the anterior superior pancreaticoduodenal vein                                | <input type="checkbox"/>                                                |
| 7*                                                                                                 | Left gastric artery                                  | LNs along the trunk of left gastric artery between its root and the origin of its ascending branch                                                                                                                                     | <input type="checkbox"/>                                                |
| 8a**                                                                                               | Common hepatic artery                                | Anterosuperior LNs along the common hepatic artery                                                                                                                                                                                     | <input type="checkbox"/>                                                |
| 8b                                                                                                 | Common hepatic artery                                | Posterior LNs along the common hepatic artery                                                                                                                                                                                          | <input type="checkbox"/>                                                |
| 9**                                                                                                | Celiac artery                                        | Celiac artery LNs                                                                                                                                                                                                                      | <input type="checkbox"/>                                                |
| 10**                                                                                               | Splenic hilum                                        | Splenic hilar LNs including those adjacent to the splenic artery distal to the pancreatic tail, and those on the roots of the short gastric arteries and those along the left gastroepiploic artery proximal to its 1st gastric branch | ( <input type="checkbox"/> )                                            |
| 11p**                                                                                              | Proximal splenic artery                              | Proximal splenic artery LNs from its origin to halfway between its origin and the pancreatic tail end                                                                                                                                  | <input type="checkbox"/>                                                |
| 11d**                                                                                              | Distal splenic artery                                | Distal splenic artery LNs from halfway between its origin and the pancreatic tail end to the end of the pancreatic tail                                                                                                                | <input type="checkbox"/>                                                |
| 12a**                                                                                              | Hepatoduodenal ligament along the hepatic artery     | Hepatoduodenal ligament LNs along the proper hepatic artery, in the caudal half between the confluence of the right and left hepatic ducts and the upper border of the pancreas                                                        | <input type="checkbox"/>                                                |
| 12b                                                                                                | Hepatoduodenal ligament along the bile duct          | Hepatoduodenal ligament LNs along the bile duct, in the caudal half between the confluence of the right and left hepatic ducts and the upper border of the pancreas                                                                    | <input type="checkbox"/>                                                |
| 12p                                                                                                | Hepatoduodenal ligament along behind the portal vein | Hepatoduodenal ligament LNs along the portal vein in the caudal half between the confluence of the right and left hepatic ducts and the upper border of the pancreas                                                                   | <input type="checkbox"/>                                                |
| 13                                                                                                 | Posterior surface of pancreatic head                 | LNs on the posterior surface of the pancreatic head cranial to the duodenal papilla                                                                                                                                                    | <input type="checkbox"/>                                                |
| 14v                                                                                                | Superior mesenteric vein                             | LNs along the superior mesenteric vein                                                                                                                                                                                                 | <input type="checkbox"/>                                                |
| 14a                                                                                                | Superior mesenteric artery                           | -                                                                                                                                                                                                                                      | <input type="checkbox"/>                                                |
| 15                                                                                                 | Middle colic vessels                                 | LNs along the middle colic vessels                                                                                                                                                                                                     | <input type="checkbox"/>                                                |
| 16a1                                                                                               | Aortic hiatus                                        | Paraaortic LNs in the diaphragmatic aortic hiatus                                                                                                                                                                                      | <input type="checkbox"/>                                                |
| 16a2                                                                                               | Abdominal aorta (celiac trunk to left renal vein)    | Paraaortic LNs between the upper margin of the origin of the celiac artery and the lower border of the left renal vein                                                                                                                 | <input type="checkbox"/>                                                |
| 16b1                                                                                               | Abdominal aorta (left renal vein to IMA)             | Paraaortic LNs between the lower border of the left renal vein and the upper border of the origin of the inferior mesenteric artery                                                                                                    | <input type="checkbox"/>                                                |
| 16b2                                                                                               | Abdominal aorta (IMA to aortic bifurcation)          | Paraaortic LNs between the upper border of the origin of the inferior mesenteric artery and the aortic bifurcation                                                                                                                     | <input type="checkbox"/>                                                |
| 17                                                                                                 | Anterior surface of pancreatic head                  | LNs on the anterior surface of the pancreatic head beneath the pancreatic sheath                                                                                                                                                       | <input type="checkbox"/>                                                |
| 18                                                                                                 | Inferior margin of pancreas                          | LNs along the inferior border of the pancreatic body                                                                                                                                                                                   | <input type="checkbox"/>                                                |
| 19                                                                                                 | Infradiaphragmatic                                   | Infradiaphragmatic LNs predominantly along the subphrenic artery                                                                                                                                                                       | <input type="checkbox"/>                                                |
| 20                                                                                                 | Esophageal hiatus of the diaphragm                   | Paraesophageal LNs in the diaphragmatic esophageal hiatus                                                                                                                                                                              | <input type="checkbox"/>                                                |
| 110                                                                                                | Paraesophageal lower thorax                          | Paraesophageal LNs in the lower thorax                                                                                                                                                                                                 | <input type="checkbox"/>                                                |
| 111                                                                                                | Supradiaphragmatic                                   | Supradiaphragmatic LNs separate from the esophagus                                                                                                                                                                                     | <input type="checkbox"/>                                                |
| 112                                                                                                | Posterior mediastinal                                | Posterior mediastinal LNs separate from the esophagus and the esophageal hiatus                                                                                                                                                        | <input type="checkbox"/>                                                |

\*required for D1 lymphadenectomy

\*\*required for D2 lymphadenectomy

|                          |                                             |
|--------------------------|---------------------------------------------|
| <input type="checkbox"/> | Not required for MEGA trial                 |
| <input type="checkbox"/> | Optional for MEGA trial                     |
| <input type="checkbox"/> | Required for MEGA trial; if not explain why |

**Appendix 3: Katz Activities of Daily Living**

| Activities<br>Points (1 or 0) | <b>Independence<br/>(1 Point)</b><br>NO supervision, direction or personal assistance.                                               | <b>Dependence<br/>(0 Points)</b><br>WITH supervision, direction, personal assistance or total care.                    |
|-------------------------------|--------------------------------------------------------------------------------------------------------------------------------------|------------------------------------------------------------------------------------------------------------------------|
| BATHING<br>Points: _____      | Bathes self completely or needs help in bathing only a single part of the body such as the back, genital area or disabled extremity. | Need help with bathing more than one part of the body, getting in or out of the tub or shower. Requires total bathing. |
| DRESSING<br>Points: _____     | Get clothes from closets and drawers and puts on clothes and outer garments complete with fasteners. May have help tying shoes.      | Needs help with dressing self or needs to be completely dressed.                                                       |
| TOILETING<br>Points: _____    | Goes to toilet, gets on and off, arranges clothes, cleans genital area without help.                                                 | Needs help transferring to the toilet, cleaning self or uses bedpan or commode.                                        |
| TRANSFERRING<br>Points: _____ | Moves in and out of bed or chair unassisted. Mechanical transfer aids are acceptable                                                 | Needs help in moving from bed to chair or requires a complete transfer.                                                |
| CONTINENCE<br>Points: _____   | Exercises complete self control over urination and defecation.                                                                       | Is partially or totally incontinent of bowel or bladder.                                                               |
| FEEDING<br>Points: _____      | Gets food from plate into mouth without help. Preparation of food may be done by another person.                                     | Needs partial or total help with feeding or requires parenteral feeding.                                               |

**Appendix 4: Clavien-Dindo-Classification**

[https://www.assessurgery.com/about\\_cci-calculator/](https://www.assessurgery.com/about_cci-calculator/)

Dindo D, Demartines N, Clavien PA. Classification of surgical complications: a new proposal with evaluation in a cohort of 6336 patients and results of a survey. Ann Surg 2004; 240(2):205-213.

| Grades     | Definition                                                                                                                                                                                                                                                                                                                                                   |
|------------|--------------------------------------------------------------------------------------------------------------------------------------------------------------------------------------------------------------------------------------------------------------------------------------------------------------------------------------------------------------|
| <b>I</b>   | Any deviation from the normal postoperative course without the need for pharmacological treatment or surgical, endoscopic and radiological interventions<br>Allowed therapeutic regimens are: drugs as antiemetics, antipyretics, analgetics, diuretics and electrolytes and physiotherapy. This grade also includes wound infections opened at the bedside. |
| <b>II</b>  | Requiring pharmacological treatment with drugs other than such allowed for grade I complications.<br>Blood transfusions and total parenteral nutrition are also included.                                                                                                                                                                                    |
| <b>III</b> | Requiring surgical, endoscopic or radiological intervention                                                                                                                                                                                                                                                                                                  |
|            | <b>IIIa</b> Intervention not under general anesthesia                                                                                                                                                                                                                                                                                                        |
|            | <b>IIIb</b> Intervention under general anesthesia                                                                                                                                                                                                                                                                                                            |
| <b>IV</b>  | Life-threatening complication (including CNS complications)* requiring IC/ICU-management                                                                                                                                                                                                                                                                     |
|            | <b>IVa</b> single organ dysfunction (including dialysis)                                                                                                                                                                                                                                                                                                     |
|            | <b>IVb</b> multiorgan dysfunction                                                                                                                                                                                                                                                                                                                            |
| <b>V</b>   | Death of a patient                                                                                                                                                                                                                                                                                                                                           |

\*brain hemorrhage, ischemic stroke, subarachnoidal bleeding, but excluding transient ischemic attacks (TIA); IC: Intermediate care; ICU: Intensive care unit.

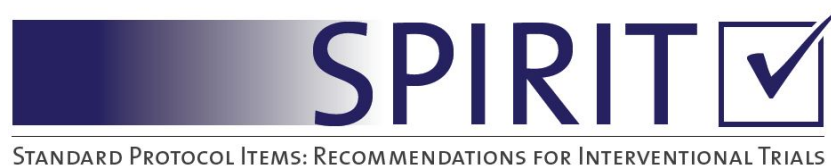

SPIRIT 2013 Checklist: Recommended items to address in a clinical trial protocol and related documents\*

| Section/item                      | Item No | Description                                                                                                                                                                                                                                                                              | Addressed on page number |
|-----------------------------------|---------|------------------------------------------------------------------------------------------------------------------------------------------------------------------------------------------------------------------------------------------------------------------------------------------|--------------------------|
| <b>Administrative information</b> |         |                                                                                                                                                                                                                                                                                          |                          |
| Title                             | 1       | Descriptive title identifying the study design, population, interventions, and, if applicable, trial acronym                                                                                                                                                                             | 1                        |
| Trial registration                | 2a      | Trial identifier and registry name. If not yet registered, name of intended registry                                                                                                                                                                                                     | 4                        |
|                                   | 2b      | All items from the World Health Organization Trial Registration Data Set                                                                                                                                                                                                                 | across whole protocol    |
| Protocol version                  | 3       | Date and version identifier                                                                                                                                                                                                                                                              | 22                       |
| Funding                           | 4       | Sources and types of financial, material, and other support                                                                                                                                                                                                                              | 24                       |
| Roles and responsibilities        | 5a      | Names, affiliations, and roles of protocol contributors                                                                                                                                                                                                                                  | 1 and 24                 |
|                                   | 5b      | Name and contact information for the trial sponsor                                                                                                                                                                                                                                       | 2                        |
|                                   | 5c      | Role of study sponsor and funders, if any, in study design; collection, management, analysis, and interpretation of data; writing of the report; and the decision to submit the report for publication, including whether they will have ultimate authority over any of these activities | 24                       |
|                                   | 5d      | Composition, roles, and responsibilities of the coordinating centre, steering committee, endpoint adjudication committee, data management team, and other individuals or groups overseeing the trial, if applicable (see Item 21a for data monitoring committee)                         | 24                       |

1 **Introduction**

2

3 Background and rationale 6a Description of research question and justification for undertaking the trial, including summary of relevant studies (published and unpublished) examining benefits and harms for each intervention 5

4

5

6 6b Explanation for choice of comparators 5

7

8 Objectives 7 Specific objectives or hypotheses 5, 11, 19

9

10 Trial design 8 Description of trial design including type of trial (eg, parallel group, crossover, factorial, single group), allocation ratio, and framework (eg, superiority, equivalence, noninferiority, exploratory) 6

11

12

13

14 **Methods: Participants, interventions, and outcomes**

15

16 Study setting 9 Description of study settings (eg, community clinic, academic hospital) and list of countries where data will be collected. Reference to where list of study sites can be obtained 6

17

18

19 Eligibility criteria 10 Inclusion and exclusion criteria for participants. If applicable, eligibility criteria for study centres and individuals who will perform the interventions (eg, surgeons, psychotherapists) 7

20

21

22 Interventions 11a Interventions for each group with sufficient detail to allow replication, including how and when they will be administered 11, 12

23

24

25 11b Criteria for discontinuing or modifying allocated interventions for a given trial participant (eg, drug dose change in response to harms, participant request, or improving/worsening disease) 15

26

27

28 11c Strategies to improve adherence to intervention protocols, and any procedures for monitoring adherence (eg, drug tablet return, laboratory tests) 4, 16

29

30

31 11d Relevant concomitant care and interventions that are permitted or prohibited during the trial 11, 12

32

33

34 Outcomes 12 Primary, secondary, and other outcomes, including the specific measurement variable (eg, systolic blood pressure), analysis metric (eg, change from baseline, final value, time to event), method of aggregation (eg, median, proportion), and time point for each outcome. Explanation of the clinical relevance of chosen efficacy and harm outcomes is strongly recommended 11

35

36

37

38

39

40 Participant timeline 13 Time schedule of enrolment, interventions (including any run-ins and washouts), assessments, and visits for participants. A schematic diagram is highly recommended (see Figure) Figure 1

41

42

43

44

45

46

|    |                                                                     |     |                                                                                                                                                                                                                                                                                                                                                                                                              |    |
|----|---------------------------------------------------------------------|-----|--------------------------------------------------------------------------------------------------------------------------------------------------------------------------------------------------------------------------------------------------------------------------------------------------------------------------------------------------------------------------------------------------------------|----|
| 1  | Sample size                                                         | 14  | Estimated number of participants needed to achieve study objectives and how it was determined, including clinical and statistical assumptions supporting any sample size calculations                                                                                                                                                                                                                        | 17 |
| 2  |                                                                     |     |                                                                                                                                                                                                                                                                                                                                                                                                              |    |
| 3  |                                                                     |     |                                                                                                                                                                                                                                                                                                                                                                                                              |    |
| 4  | Recruitment                                                         | 15  | Strategies for achieving adequate participant enrolment to reach target sample size                                                                                                                                                                                                                                                                                                                          | 16 |
| 5  |                                                                     |     |                                                                                                                                                                                                                                                                                                                                                                                                              |    |
| 6  |                                                                     |     |                                                                                                                                                                                                                                                                                                                                                                                                              |    |
| 7  | <b>Methods: Assignment of interventions (for controlled trials)</b> |     |                                                                                                                                                                                                                                                                                                                                                                                                              |    |
| 8  | Allocation:                                                         |     |                                                                                                                                                                                                                                                                                                                                                                                                              |    |
| 9  |                                                                     |     |                                                                                                                                                                                                                                                                                                                                                                                                              |    |
| 10 | Sequence                                                            | 16a | Method of generating the allocation sequence (eg, computer-generated random numbers), and list of any factors for stratification. To reduce predictability of a random sequence, details of any planned restriction (eg, blocking) should be provided in a separate document that is unavailable to those who enrol participants or assign interventions                                                     | 14 |
| 11 | generation                                                          |     |                                                                                                                                                                                                                                                                                                                                                                                                              |    |
| 12 |                                                                     |     |                                                                                                                                                                                                                                                                                                                                                                                                              |    |
| 13 |                                                                     |     |                                                                                                                                                                                                                                                                                                                                                                                                              |    |
| 14 |                                                                     |     |                                                                                                                                                                                                                                                                                                                                                                                                              |    |
| 15 |                                                                     |     |                                                                                                                                                                                                                                                                                                                                                                                                              |    |
| 16 | Allocation                                                          | 16b | Mechanism of implementing the allocation sequence (eg, central telephone; sequentially numbered, opaque, sealed envelopes), describing any steps to conceal the sequence until interventions are assigned                                                                                                                                                                                                    | 14 |
| 17 | concealment                                                         |     |                                                                                                                                                                                                                                                                                                                                                                                                              |    |
| 18 | mechanism                                                           |     |                                                                                                                                                                                                                                                                                                                                                                                                              |    |
| 19 |                                                                     |     |                                                                                                                                                                                                                                                                                                                                                                                                              |    |
| 20 | Implementation                                                      | 16c | Who will generate the allocation sequence, who will enrol participants, and who will assign participants to interventions                                                                                                                                                                                                                                                                                    | 14 |
| 21 |                                                                     |     |                                                                                                                                                                                                                                                                                                                                                                                                              |    |
| 22 |                                                                     |     |                                                                                                                                                                                                                                                                                                                                                                                                              |    |
| 23 |                                                                     |     |                                                                                                                                                                                                                                                                                                                                                                                                              |    |
| 24 | Blinding (masking)                                                  | 17a | Who will be blinded after assignment to interventions (eg, trial participants, care providers, outcome assessors, data analysts), and how                                                                                                                                                                                                                                                                    | 14 |
| 25 |                                                                     |     |                                                                                                                                                                                                                                                                                                                                                                                                              |    |
| 26 |                                                                     |     |                                                                                                                                                                                                                                                                                                                                                                                                              |    |
| 27 |                                                                     | 17b | If blinded, circumstances under which unblinding is permissible, and procedure for revealing a participant's allocated intervention during the trial                                                                                                                                                                                                                                                         | 14 |
| 28 |                                                                     |     |                                                                                                                                                                                                                                                                                                                                                                                                              |    |
| 29 |                                                                     |     |                                                                                                                                                                                                                                                                                                                                                                                                              |    |
| 30 |                                                                     |     |                                                                                                                                                                                                                                                                                                                                                                                                              |    |
| 31 | <b>Methods: Data collection, management, and analysis</b>           |     |                                                                                                                                                                                                                                                                                                                                                                                                              |    |
| 32 |                                                                     |     |                                                                                                                                                                                                                                                                                                                                                                                                              |    |
| 33 | Data collection                                                     | 18a | Plans for assessment and collection of outcome, baseline, and other trial data, including any related processes to promote data quality (eg, duplicate measurements, training of assessors) and a description of study instruments (eg, questionnaires, laboratory tests) along with their reliability and validity, if known. Reference to where data collection forms can be found, if not in the protocol | 17 |
| 34 | methods                                                             |     |                                                                                                                                                                                                                                                                                                                                                                                                              |    |
| 35 |                                                                     |     |                                                                                                                                                                                                                                                                                                                                                                                                              |    |
| 36 |                                                                     |     |                                                                                                                                                                                                                                                                                                                                                                                                              |    |
| 37 |                                                                     |     |                                                                                                                                                                                                                                                                                                                                                                                                              |    |
| 38 |                                                                     |     |                                                                                                                                                                                                                                                                                                                                                                                                              |    |
| 39 |                                                                     | 18b | Plans to promote participant retention and complete follow-up, including list of any outcome data to be collected for participants who discontinue or deviate from intervention protocols                                                                                                                                                                                                                    | 17 |
| 40 |                                                                     |     |                                                                                                                                                                                                                                                                                                                                                                                                              |    |
| 41 |                                                                     |     |                                                                                                                                                                                                                                                                                                                                                                                                              |    |
| 42 |                                                                     |     |                                                                                                                                                                                                                                                                                                                                                                                                              |    |
| 43 |                                                                     |     |                                                                                                                                                                                                                                                                                                                                                                                                              |    |
| 44 |                                                                     |     |                                                                                                                                                                                                                                                                                                                                                                                                              |    |
| 45 |                                                                     |     |                                                                                                                                                                                                                                                                                                                                                                                                              |    |
| 46 |                                                                     |     |                                                                                                                                                                                                                                                                                                                                                                                                              |    |

|    |                                 |     |                                                                                                                                                                                                                                                                                                                                       |        |
|----|---------------------------------|-----|---------------------------------------------------------------------------------------------------------------------------------------------------------------------------------------------------------------------------------------------------------------------------------------------------------------------------------------|--------|
| 1  | Data management                 | 19  | Plans for data entry, coding, security, and storage, including any related processes to promote data quality (eg, double data entry; range checks for data values). Reference to where details of data management procedures can be found, if not in the protocol                                                                     | 16, 17 |
| 2  |                                 |     |                                                                                                                                                                                                                                                                                                                                       |        |
| 3  |                                 |     |                                                                                                                                                                                                                                                                                                                                       |        |
| 4  |                                 |     |                                                                                                                                                                                                                                                                                                                                       |        |
| 5  | Statistical methods             | 20a | Statistical methods for analysing primary and secondary outcomes. Reference to where other details of the statistical analysis plan can be found, if not in the protocol                                                                                                                                                              | 17     |
| 6  |                                 |     |                                                                                                                                                                                                                                                                                                                                       |        |
| 7  |                                 |     |                                                                                                                                                                                                                                                                                                                                       |        |
| 8  |                                 | 20b | Methods for any additional analyses (eg, subgroup and adjusted analyses)                                                                                                                                                                                                                                                              | 17     |
| 9  |                                 |     |                                                                                                                                                                                                                                                                                                                                       |        |
| 10 |                                 | 20c | Definition of analysis population relating to protocol non-adherence (eg, as randomised analysis), and any statistical methods to handle missing data (eg, multiple imputation)                                                                                                                                                       | 17     |
| 11 |                                 |     |                                                                                                                                                                                                                                                                                                                                       |        |
| 12 |                                 |     |                                                                                                                                                                                                                                                                                                                                       |        |
| 13 |                                 |     |                                                                                                                                                                                                                                                                                                                                       |        |
| 14 | <b>Methods: Monitoring</b>      |     |                                                                                                                                                                                                                                                                                                                                       |        |
| 15 |                                 |     |                                                                                                                                                                                                                                                                                                                                       |        |
| 16 | Data monitoring                 | 21a | Composition of data monitoring committee (DMC); summary of its role and reporting structure; statement of whether it is independent from the sponsor and competing interests; and reference to where further details about its charter can be found, if not in the protocol. Alternatively, an explanation of why a DMC is not needed | 25     |
| 17 |                                 |     |                                                                                                                                                                                                                                                                                                                                       |        |
| 18 |                                 |     |                                                                                                                                                                                                                                                                                                                                       |        |
| 19 |                                 |     |                                                                                                                                                                                                                                                                                                                                       |        |
| 20 |                                 |     |                                                                                                                                                                                                                                                                                                                                       |        |
| 21 |                                 |     |                                                                                                                                                                                                                                                                                                                                       |        |
| 22 |                                 | 21b | Description of any interim analyses and stopping guidelines, including who will have access to these interim results and make the final decision to terminate the trial                                                                                                                                                               | 16, 17 |
| 23 |                                 |     |                                                                                                                                                                                                                                                                                                                                       |        |
| 24 |                                 |     |                                                                                                                                                                                                                                                                                                                                       |        |
| 25 | Harms                           | 22  | Plans for collecting, assessing, reporting, and managing solicited and spontaneously reported adverse events and other unintended effects of trial interventions or trial conduct                                                                                                                                                     | 15     |
| 26 |                                 |     |                                                                                                                                                                                                                                                                                                                                       |        |
| 27 |                                 |     |                                                                                                                                                                                                                                                                                                                                       |        |
| 28 | Auditing                        | 23  | Frequency and procedures for auditing trial conduct, if any, and whether the process will be independent from investigators and the sponsor                                                                                                                                                                                           | 25     |
| 29 |                                 |     |                                                                                                                                                                                                                                                                                                                                       |        |
| 30 |                                 |     |                                                                                                                                                                                                                                                                                                                                       |        |
| 31 |                                 |     |                                                                                                                                                                                                                                                                                                                                       |        |
| 32 | <b>Ethics and dissemination</b> |     |                                                                                                                                                                                                                                                                                                                                       |        |
| 33 |                                 |     |                                                                                                                                                                                                                                                                                                                                       |        |
| 34 | Research ethics approval        | 24  | Plans for seeking research ethics committee/institutional review board (REC/IRB) approval                                                                                                                                                                                                                                             | 21     |
| 35 |                                 |     |                                                                                                                                                                                                                                                                                                                                       |        |
| 36 |                                 |     |                                                                                                                                                                                                                                                                                                                                       |        |
| 37 | Protocol amendments             | 25  | Plans for communicating important protocol modifications (eg, changes to eligibility criteria, outcomes, analyses) to relevant parties (eg, investigators, REC/IRBs, trial participants, trial registries, journals, regulators)                                                                                                      | 21, 22 |
| 38 |                                 |     |                                                                                                                                                                                                                                                                                                                                       |        |
| 39 |                                 |     |                                                                                                                                                                                                                                                                                                                                       |        |
| 40 |                                 |     |                                                                                                                                                                                                                                                                                                                                       |        |
| 41 |                                 |     |                                                                                                                                                                                                                                                                                                                                       |        |
| 42 |                                 |     |                                                                                                                                                                                                                                                                                                                                       |        |
| 43 |                                 |     |                                                                                                                                                                                                                                                                                                                                       |        |
| 44 |                                 |     |                                                                                                                                                                                                                                                                                                                                       |        |
| 45 |                                 |     |                                                                                                                                                                                                                                                                                                                                       |        |
| 46 |                                 |     |                                                                                                                                                                                                                                                                                                                                       |        |

|    |                               |     |                                                                                                                                                                                                                                                                                     |          |
|----|-------------------------------|-----|-------------------------------------------------------------------------------------------------------------------------------------------------------------------------------------------------------------------------------------------------------------------------------------|----------|
| 1  | Consent or assent             | 26a | Who will obtain informed consent or assent from potential trial participants or authorised surrogates, and how (see Item 32)                                                                                                                                                        | 9        |
| 2  |                               |     |                                                                                                                                                                                                                                                                                     |          |
| 3  |                               |     |                                                                                                                                                                                                                                                                                     |          |
| 4  |                               | 26b | Additional consent provisions for collection and use of participant data and biological specimens in ancillary studies, if applicable                                                                                                                                               | 9        |
| 5  |                               |     |                                                                                                                                                                                                                                                                                     |          |
| 6  |                               |     |                                                                                                                                                                                                                                                                                     |          |
| 7  | Confidentiality               | 27  | How personal information about potential and enrolled participants will be collected, shared, and maintained in order to protect confidentiality before, during, and after the trial                                                                                                | 7, 9     |
| 8  |                               |     |                                                                                                                                                                                                                                                                                     |          |
| 9  |                               |     |                                                                                                                                                                                                                                                                                     |          |
| 10 | Declaration of interests      | 28  | Financial and other competing interests for principal investigators for the overall trial and each study site                                                                                                                                                                       | 24, 25   |
| 11 |                               |     |                                                                                                                                                                                                                                                                                     |          |
| 12 |                               |     |                                                                                                                                                                                                                                                                                     |          |
| 13 | Access to data                | 29  | Statement of who will have access to the final trial dataset, and disclosure of contractual agreements that limit such access for investigators                                                                                                                                     | 16       |
| 14 |                               |     |                                                                                                                                                                                                                                                                                     |          |
| 15 |                               |     |                                                                                                                                                                                                                                                                                     |          |
| 16 |                               |     |                                                                                                                                                                                                                                                                                     |          |
| 17 | Ancillary and post-trial care | 30  | Provisions, if any, for ancillary and post-trial care, and for compensation to those who suffer harm from trial participation                                                                                                                                                       | NA       |
| 18 |                               |     |                                                                                                                                                                                                                                                                                     |          |
| 19 |                               |     |                                                                                                                                                                                                                                                                                     |          |
| 20 | Dissemination policy          | 31a | Plans for investigators and sponsor to communicate trial results to participants, healthcare professionals, the public, and other relevant groups (eg, via publication, reporting in results databases, or other data sharing arrangements), including any publication restrictions | 21       |
| 21 |                               |     |                                                                                                                                                                                                                                                                                     |          |
| 22 |                               |     |                                                                                                                                                                                                                                                                                     |          |
| 23 |                               |     |                                                                                                                                                                                                                                                                                     |          |
| 24 |                               | 31b | Authorship eligibility guidelines and any intended use of professional writers                                                                                                                                                                                                      | 24       |
| 25 |                               |     |                                                                                                                                                                                                                                                                                     |          |
| 26 |                               | 31c | Plans, if any, for granting public access to the full protocol, participant-level dataset, and statistical code                                                                                                                                                                     | 25       |
| 27 |                               |     |                                                                                                                                                                                                                                                                                     |          |
| 28 |                               |     |                                                                                                                                                                                                                                                                                     |          |
| 29 | <b>Appendices</b>             |     |                                                                                                                                                                                                                                                                                     |          |
| 30 |                               |     |                                                                                                                                                                                                                                                                                     |          |
| 31 | Informed consent materials    | 32  | Model consent form and other related documentation given to participants and authorised surrogates                                                                                                                                                                                  | attached |
| 32 |                               |     |                                                                                                                                                                                                                                                                                     |          |
| 33 |                               |     |                                                                                                                                                                                                                                                                                     |          |
| 34 | Biological specimens          | 33  | Plans for collection, laboratory evaluation, and storage of biological specimens for genetic or molecular analysis in the current trial and for future use in ancillary studies, if applicable                                                                                      | Table 1  |
| 35 |                               |     |                                                                                                                                                                                                                                                                                     |          |
| 36 |                               |     |                                                                                                                                                                                                                                                                                     |          |

37 \*It is strongly recommended that this checklist be read in conjunction with the SPIRIT 2013 Explanation & Elaboration for important clarification on the items.  
 38 Amendments to the protocol should be tracked and dated. The SPIRIT checklist is copyrighted by the SPIRIT Group under the Creative Commons  
 39 “[Attribution-NonCommercial-NoDerivs 3.0 Unported](https://creativecommons.org/licenses/by-nc-nd/3.0/)” license.  
 40  
 41  
 42



# BMJ Open

## Minimally invasive versus open total GAstrectomy (MEGA): Study protocol for a multicenter randomized controlled trial (DRKS00025765)

|                               |                                                                                                                                                                                                                                                                                                                                                                                                                                                                                                                                                                                                                                                                                                                                                                                                                                                                                                                                                                                                                                                                                                                                                                                                                                                                                                                                                                                                                                                                                                                                                                                                                                                                                                                                                                                                                                                                                                                                                                                                                                                                                                                                                                                                                                  |
|-------------------------------|----------------------------------------------------------------------------------------------------------------------------------------------------------------------------------------------------------------------------------------------------------------------------------------------------------------------------------------------------------------------------------------------------------------------------------------------------------------------------------------------------------------------------------------------------------------------------------------------------------------------------------------------------------------------------------------------------------------------------------------------------------------------------------------------------------------------------------------------------------------------------------------------------------------------------------------------------------------------------------------------------------------------------------------------------------------------------------------------------------------------------------------------------------------------------------------------------------------------------------------------------------------------------------------------------------------------------------------------------------------------------------------------------------------------------------------------------------------------------------------------------------------------------------------------------------------------------------------------------------------------------------------------------------------------------------------------------------------------------------------------------------------------------------------------------------------------------------------------------------------------------------------------------------------------------------------------------------------------------------------------------------------------------------------------------------------------------------------------------------------------------------------------------------------------------------------------------------------------------------|
| Journal:                      | <i>BMJ Open</i>                                                                                                                                                                                                                                                                                                                                                                                                                                                                                                                                                                                                                                                                                                                                                                                                                                                                                                                                                                                                                                                                                                                                                                                                                                                                                                                                                                                                                                                                                                                                                                                                                                                                                                                                                                                                                                                                                                                                                                                                                                                                                                                                                                                                                  |
| Manuscript ID                 | bmjopen-2022-064286.R2                                                                                                                                                                                                                                                                                                                                                                                                                                                                                                                                                                                                                                                                                                                                                                                                                                                                                                                                                                                                                                                                                                                                                                                                                                                                                                                                                                                                                                                                                                                                                                                                                                                                                                                                                                                                                                                                                                                                                                                                                                                                                                                                                                                                           |
| Article Type:                 | Protocol                                                                                                                                                                                                                                                                                                                                                                                                                                                                                                                                                                                                                                                                                                                                                                                                                                                                                                                                                                                                                                                                                                                                                                                                                                                                                                                                                                                                                                                                                                                                                                                                                                                                                                                                                                                                                                                                                                                                                                                                                                                                                                                                                                                                                         |
| Date Submitted by the Author: | 02-Oct-2022                                                                                                                                                                                                                                                                                                                                                                                                                                                                                                                                                                                                                                                                                                                                                                                                                                                                                                                                                                                                                                                                                                                                                                                                                                                                                                                                                                                                                                                                                                                                                                                                                                                                                                                                                                                                                                                                                                                                                                                                                                                                                                                                                                                                                      |
| Complete List of Authors:     | <p>Nickel, Felix; UniversitätsKlinikum Heidelberg, Department of General, Visceral and Transplantation Surgery<br/> Studier-Fischer, Alexander; UniversitätsKlinikum Heidelberg, Department of General, Visceral and Transplantation Surgery<br/> Haussmann, David; UniversitätsKlinikum Heidelberg, Department of General, Visceral and Transplantation Surgery<br/> Klotz, Rosa; UniversitätsKlinikum Heidelberg, Department of General, Visceral and Transplantation Surgery; Study Center of the German Society of Surgery<br/> Vogel-Adigozalov, Sophia; UniversitätsKlinikum Heidelberg, Department of General, Visceral and Transplantation Surgery; Study Center of the German Society of Surgery<br/> Tenckhoff, Solveig; UniversitätsKlinikum Heidelberg, Department of General, Visceral and Transplantation Surgery; Study Center of the German Society of Surgery<br/> Klose, Christina; UniversitätsKlinikum Heidelberg, Institute of Medical Biometry and Informatics<br/> Feisst, Manuel; UniversitätsKlinikum Heidelberg, Institute of Medical Biometry<br/> Zimmermann, Samuel; UniversitätsKlinikum Heidelberg, Institute of Medical Biometry<br/> Babic, Benjamin; University Hospital Cologne, Department of General, Visceral and Tumor and Transplantation Surgery<br/> Berlt, Felix; Johannes Gutenberg University Hospital Mainz, Department of General, Visceral and Transplantation Surgery<br/> Bruns, Christiane; University Hospital Cologne, Department of General, Visceral, Tumor and Transplantation Surgery<br/> Gockel, Ines; UniversitätsKlinikum Leipzig, Department of Visceral, Transplantation, Thoracic and Vascular Surgery<br/> Graf, Sandra; University Hospital Ulm, Department of General and Visceral Surgery<br/> Grimminger, Peter; Johannes Gutenberg University Hospital Mainz, Department of General, Visceral and Transplantation Surgery<br/> Gutschow, Christian; University Hospital Zurich, Department of Visceral and Transplantation Surgery<br/> Hoepfner, Jens; University Medical Center Schleswig Holstein Lübeck Campus, Department of Surgery<br/> Ludwig, Kaja; Klinikum Sudstadt Rostock, Department of General, Visceral, Thoracic and Vascular Surgery</p> |

|                                 |                                                                                                                                                                                                                                                                                                                                                                                                                                                                                                                                                                                                                                                                                                                                                                                                                                                                                                                                                                                                                              |
|---------------------------------|------------------------------------------------------------------------------------------------------------------------------------------------------------------------------------------------------------------------------------------------------------------------------------------------------------------------------------------------------------------------------------------------------------------------------------------------------------------------------------------------------------------------------------------------------------------------------------------------------------------------------------------------------------------------------------------------------------------------------------------------------------------------------------------------------------------------------------------------------------------------------------------------------------------------------------------------------------------------------------------------------------------------------|
|                                 | Mirow, Lutz; Klinikum Chemnitz gGmbH, Department of General and Visceral Surgery<br>Mönig, Stefan; Geneva University Hospitals, Department of Digestive Surgery<br>Reim, Daniel; University Hospital Munich, Department of Surgery<br>Seyfried, Florian; Central Würzburg Hospital, Department of General, Visceral, Transplant, Vascular and Pediatric Surgery<br>Stange, Daniel; Technische Universität Dresden, Department of Visceral, Thoracic and Vascular Surgery<br>Billeter, Adrian; UniversitätsKlinikum Heidelberg, Department of General, Visceral, and Transplantation Surgery<br>Nienhüser, Henrik; UniversitätsKlinikum Heidelberg, Department of General, Visceral and Transplantation Surgery<br>Probst, Pascal; Kantonsspital Frauenfeld, Department of Surgery<br>Schmidt, Thomas; University Hospital Cologne, Department of General, Visceral and Tumor and Transplantation Surgery<br>Müller-Stich, Beat; UniversitätsKlinikum Heidelberg, Department of General, Visceral and Transplantation Surgery |
| <b>Primary Subject Heading</b>: | Surgery                                                                                                                                                                                                                                                                                                                                                                                                                                                                                                                                                                                                                                                                                                                                                                                                                                                                                                                                                                                                                      |
| Secondary Subject Heading:      | Oncology                                                                                                                                                                                                                                                                                                                                                                                                                                                                                                                                                                                                                                                                                                                                                                                                                                                                                                                                                                                                                     |
| Keywords:                       | SURGERY, ONCOLOGY, Gastrointestinal tumours < ONCOLOGY                                                                                                                                                                                                                                                                                                                                                                                                                                                                                                                                                                                                                                                                                                                                                                                                                                                                                                                                                                       |
|                                 |                                                                                                                                                                                                                                                                                                                                                                                                                                                                                                                                                                                                                                                                                                                                                                                                                                                                                                                                                                                                                              |

SCHOLARONE™  
Manuscripts

1  
2  
3 1 **Minimally invasivE versus open total GAstrectomy (MEGA): Study protocol for a**  
4  
5 2 **multicenter randomized controlled trial (DRKS00025765)**  
6

7  
8 3 Felix Nickel<sup>1\*</sup>, Alexander Studier-Fischer<sup>1\*</sup>, David Hausmann<sup>1</sup>, Rosa Klotz<sup>1,2</sup>, Sophia  
9  
10 4 Vogel-Adigozalov<sup>1,2</sup>, Solveig Tenckhoff<sup>1,2</sup>, Christina Klose<sup>3</sup>, Manuel Feisst<sup>3</sup>, Samuel  
11  
12 5 Zimmermann<sup>3</sup>, Benjamin Babic<sup>4</sup>, Felix Berlt<sup>5</sup>, Christiane Bruns<sup>4</sup>, Ines Gockel<sup>6</sup>, Sandra  
13  
14 6 Graf<sup>7</sup>, Peter Grimminger<sup>5</sup>, Christian Gutschow<sup>8</sup>, Jens Hoepfner<sup>9</sup>, Kaja Ludwig<sup>10</sup>, Lutz  
15  
16 7 Mirow<sup>11</sup>, Stefan Mönig<sup>12</sup>, Daniel Reim<sup>13</sup>, Florian Seyfried<sup>14</sup>, Daniel Stange<sup>15</sup>, Adrian  
17  
18 8 Billeter<sup>1</sup>, Henrik Nienhüser<sup>1</sup>, Pascal Probst<sup>16</sup>, Thomas Schmidt<sup>4</sup>, Beat P. Müller-Stich<sup>1</sup>  
19  
20  
21  
22  
23

24 10 \*Contributed equally  
25  
26  
27

28 12 <sup>1</sup>Department of General, Visceral and Transplantation Surgery, Heidelberg University  
29  
30 Hospital, Heidelberg, Germany  
31

32  
33 14 <sup>2</sup>Study Center of the German Society of Surgery, Heidelberg, Germany  
34

35 15 <sup>3</sup>Institute of Medical Biometry, Heidelberg, Germany  
36

37 16 <sup>4</sup>Department of General, Visceral and Tumor and Transplantation Surgery, Cologne  
38  
39 University Hospital, Cologne, Germany  
40

41  
42 18 <sup>5</sup>Department of General, Visceral and Transplantation Surgery, Mainz University  
43  
44 Hospital, Mainz, Germany  
45

46  
47 20 <sup>6</sup>Department of Visceral, Transplantation, Thoracic and Vascular Surgery, Leipzig  
48  
49 University Hospital, Leipzig, Germany  
50

51 22 <sup>7</sup>Department of General and Visceral Surgery, Ulm University Hospital, Ulm, Germany  
52

53 23 <sup>8</sup>Department of Visceral and Transplantation Surgery, Zurich University Hospital,  
54  
55 Zurich, Switzerland  
56

57  
58 25 <sup>9</sup>Department of Surgery, University Medical Center Schleswig-Holstein, Campus  
59  
60 Lübeck, Germany

1  
2  
3 27 <sup>10</sup>Department of General, Visceral, Thoracic and Vascular Surgery, Rostock Südstadt  
4  
5 28 Hospital, Rostock, Germany

6  
7  
8 29 <sup>11</sup>Department of General and Visceral Surgery, Klinikum Chemnitz gGmbH, Chemnitz,  
9  
10 30 Germany

11  
12 31 <sup>12</sup>Department of Digestive Surgery, Geneva University Hospital, Geneva, Switzerland

13  
14 32 <sup>13</sup>Department of Surgery, TUM University Hospital, Munich, Germany

15  
16  
17 33 <sup>14</sup>Department of General, Visceral, Transplant, Vascular and Pediatric Surgery,  
18  
19 34 Würzburg University Hospital, Würzburg, Germany

20  
21 35 <sup>15</sup>Department of Visceral, Thoracic and Vascular Surgery, Dresden University Hospital,  
22  
23 36 Dresden, Germany

24  
25  
26 37 <sup>16</sup>Department of Surgery, Cantonal Hospital Frauenfeld, Thurgau, Switzerland

27  
28 38

29  
30 39

31  
32  
33 40 Correspondence & Trial Sponsor:

34  
35 41 Prof. Dr. Beat Müller, [BeatPeter.Mueller@med.uni-heidelberg.de](mailto:BeatPeter.Mueller@med.uni-heidelberg.de)

36  
37 42 Department of General, Visceral and Transplantation Surgery, Heidelberg University  
38  
39 43 Hospital, Im Neuenheimer Feld 420, 69120 Heidelberg, Germany

40  
41  
42 44

43  
44 45 **Abstract**

45  
46 46 **Introduction:**

47  
48 47 The only curative treatment for most gastric cancer is radical gastrectomy with D2  
49  
50 48 lymphadenectomy (LAD). Minimally invasive total gastrectomy (MIG) aims to reduce  
51  
52 49 postoperative morbidity, but its use has not yet been widely established in Western  
53  
54 50 countries. MEGA is the first Western multicenter randomized controlled trial (RCT) to  
55  
56 51 compare postoperative morbidity following MIG versus open total gastrectomy (OG).  
57  
58  
59  
60

52

1  
2  
3 **53 Methods and analysis:**  
4

5  
6 54 This superiority multicenter RCT compares MIG (intervention) to OG (control) for  
7  
8 55 oncological total gastrectomy with D2 or D2+ LAD. Recruitment is expected to last for  
9  
10 56 2 years. Inclusion criteria comprise age between 18 and 84 years and planned total  
11  
12 57 gastrectomy after initial diagnosis of gastric carcinoma. Exclusion criteria include  
13  
14 58 ECOG performance status > 2 (**Appendix 1**), tumors requiring extended gastrectomy  
15  
16 59 or less than total gastrectomy, previous abdominal surgery or extensive adhesions  
17  
18 60 seriously complicating MIG, other active oncologic disease, advanced stages (T4 or  
19  
20 61 M1), emergency setting, and pregnancy.  
21  
22

23  
24 62 The sample size was calculated at 80 participants per group. The primary endpoint is  
25  
26 63 30-day postoperative morbidity as measured by the Comprehensive Complications  
27  
28 64 Index (CCI). Secondary endpoints include postoperative morbidity and mortality,  
29  
30 65 adherence to a fast-track protocol, and patient-reported quality of life (QoL) scores  
31  
32 66 (QoR-15, EUROQOL EQ-5D-5L, EORTC QLQ-C30, EORTC QLQ-STO22, ADLs, and  
33  
34 67 BIS). Oncologic endpoints include rate of R0 resection, lymph node yield, disease-free  
35  
36 68 survival, and overall survival at 60-month follow-up.  
37  
38  
39

40 69

41  
42 **70 Ethics and dissemination:**  
43

44  
45 71 Ethical approval has been received by the independent Ethics Committee of the  
46  
47 72 Medical Faculty, University of Heidelberg (S-816/2021) and will be received from each  
48  
49 73 responsible ethics committee for each individual participating center prior to  
50  
51 74 recruitment. Results will be published open access.  
52  
53

54 75

55  
56 76 **Trial registration:** German Clinical Trials Register DRKS00025765. Registered on  
57  
58 77 December 22<sup>nd</sup>, 2021.  
59  
60

78

1  
2  
3 79 **Keywords:** Minimally invasive gastrectomy, total gastrectomy, gastric cancer, Roux-Y  
4  
5 80 reconstruction, linear stapled anastomosis, circular stapled anastomosis, randomized  
6  
7 81 controlled trial, comprehensive complication index, fast-track, enhanced recovery after  
8  
9 82 surgery  
10  
11

12 83

13  
14 84 **Strengths and limitations of this study**

- 15  
16  
17 85 - MEGA is the first Western multicenter RCT to specifically compare OG with MIG  
18  
19 86 in terms of postoperative morbidity using the comprehensive complication index  
20  
21 87 (CCI).  
22  
23  
24 88 - Usage of the CCI as a comprehensive outcome measure allows for objective  
25  
26 89 comparisons with other trials.  
27  
28 90 - Differentiation between robotic and laparoscopic total gastrectomy will be made  
29  
30 91 in the explorative subgroup analysis only.  
31  
32  
33 92 - High levels of standardization, intraoperative photo documentation, well-  
34  
35 93 powered group sizes, and risk-based monitoring by the Study Center of the  
36  
37 94 German Society of Surgery (SDGC) will guarantee objective data acquisition,  
38  
39 95 increase patients' adherence to the protocol, and ultimately lead to exceptional  
40  
41 96 data quality.  
42  
43  
44  
45  
46  
47  
48  
49  
50  
51  
52  
53  
54  
55  
56  
57  
58  
59  
60

## 98 Introduction

99 Gastric cancer is the sixth most common tumor disease in the world and causes the  
100 second most deaths [1]. In 2018, approximately one million patients worldwide and  
101 approximately 15,000 patients in Germany were diagnosed with gastric cancer, of  
102 which an average of 76% die from the disease [1]. Gastric cancer causes one of the  
103 highest oncologic disease burdens as measured by lost disability-adjusted life years  
104 (DALY). This fact highlights the aggressiveness of the disease. Age-adjusted DALY  
105 rates per 100,000 reach 241 for men and 146 for women, ranking 4th after liver, lung,  
106 and breast cancer [2, 3].

107 Currently, the only therapy that offers a chance of cure is gastrectomy, with a 5-year  
108 survival rate of 20-30% and postoperative morbidity and mortality as high as 63% [4]  
109 and 11% [5-10], even at experienced centers [4-18]. Therefore, there is a great need  
110 to identify the optimal surgical approach using evidence from multicenter data in order  
111 to improve oncologic outcome and to decrease postoperative complications.

112 The current gold standard is open gastrectomy (OG) with D2 lymphadenectomy (LAD)  
113 (**Appendix 2**), but its highly invasive nature leads to potentially high complication rates,  
114 especially in elderly and obese patients. These frequent postoperative complications  
115 result in higher mortality, lower QoL, a longer hospital stay, and thus a higher burden  
116 on the health care system [6, 19]. In other fields of visceral surgery, such as  
117 appendectomy, cholecystectomy, obesity surgery, and esophagectomy, minimally  
118 invasive surgery has already replaced the open approach as the standard of care [7,  
119 20-22]. Several randomized controlled trials (RCT) have demonstrated reduced  
120 postoperative complications following minimally invasive surgery compared to the  
121 open approach. This finding is due to the procedure's resulting smaller wounds,  
122 reduced operative trauma, lower blood loss, shorter hospital stay, and faster  
123 rehabilitation time [22-24].

1  
2  
3 124 Postoperative complications, however, are not only important for the immediate  
4  
5 125 postoperative course, which is usually secondary in relevance, but can also affect long-  
6  
7 126 term oncologic outcome [25-27]. In a study of 432 patients with curative gastrectomy  
8  
9 127 and D2 LAD for treatment of gastric cancer, the occurrence of postoperative in-hospital  
10  
11 128 complications was an independent predictor of worse 5-year survival (22% vs. 40%).  
12  
13  
14 129 This can be perceived as an indication that postoperative complications may lead to  
15  
16  
17 130 higher mortality in the long term [28]. Therefore, the trend towards favoring minimally  
18  
19 131 invasive gastrectomy (MIG) for gastric cancer is increasing.  
20  
21  
22 132

## 23 133 **Methods and analysis**

### 24 134 **Setting**

25  
26 135 The MEGA trial is a prospective randomized, controlled, non-blinded, two-armed  
27  
28 136 multicenter surgical superiority trial with a confirmatory character. It includes 14  
29  
30  
31 137 surgical centers in Germany and Switzerland and is coordinated by the Department of  
32  
33  
34 138 General, Visceral and Transplantation Surgery at Heidelberg University Hospital, in  
35  
36  
37 139 Germany. Recruitment is planned for 2 consecutive years. The study protocol was  
38  
39  
40 140 accepted by the Independent Ethics Committee of the Medical Faculty, University of  
41  
42 141 Heidelberg (registration number S-816/2021) prior to recruitment. The trial was  
43  
44 142 registered at DRKS under the registration number DRKS00025765 on December 22<sup>nd</sup>,  
45  
46  
47 143 2021 [29]. No secondary identifying numbers such as a Universal Trial Number have  
48  
49 144 been assigned. Recommendations of the SPIRIT (Standard Protocol Items:  
50  
51 145 Recommendations for Interventional Trials) checklist were followed [30].  
52  
53  
54 146

### 55 147 **Patient recruitment**

56  
57  
58 148 Recruitment is planned to take place at 14 surgical centers in Germany and  
59  
60 149 Switzerland. Certain eligibility criteria have to be met by the participating centers and



1  
2  
3 150 surgeons in order to eliminate bias from inexperience or learning curves. Therefore,  
4  
5 151 hospitals need to have a case load of  $\geq 20$  gastrectomies per year, and every trial  
6  
7 152 surgeon has to provide evidence of at least 20 previously performed surgeries of the  
8  
9 153 respective surgical procedure/s he or she wants to contribute [OG, laparoscopic  
10 154 gastrectomy (LAG) or robotic-assisted gastrectomy (RAG)]. Eligible patients will be  
11  
12 155 screened consecutively to eliminate selection bias and will receive diagnostic staging  
13  
14 156 laparoscopy prior to randomization.

15 157 Inclusion criteria:

- 16 158 - Age between 18 and 84 years  
17  
18 159 - Planned total gastrectomy after first diagnosis of gastric carcinoma  
19  
20 160 - Ability of patient to understand character and consequences of the trial  
21  
22 161 - Written informed consent

23 162 Exclusion criteria:

- 24 163 - ECOG performance status  $> 2$   
25  
26 164 - Planned extended gastrectomy or less than total gastrectomy (e.g.,  
27  
28 165 adenocarcinoma of the esophagogastric junction (AEG) I and AEG II, or distal  
29  
30 166 gastric tumors of an intestinal subtype)  
31  
32 167 - Previous gastric surgery or extensive adhesions seriously complicating MIG  
33  
34 168 - Other active oncologic disease or history of cancer limiting prognosis in  
35  
36 169 comparison to the gastric cancer  
37  
38 170 - Emergency setting  
39  
40 171 - Language barriers rendering the patient unable to fill out patient-reported  
41  
42 172 outcome questionnaires  
43  
44 173 - Participation in another intervention trial that might interfere with the  
45  
46 174 intervention and/or outcome of this trial  
47  
48 175 - Pregnancy

1  
2  
3 176 Exclusion criteria previously or during staging laparoscopy:  
4

5 177 - T4  
6

7 178 - M1  
8  
9

10 179 Neoadjuvant chemotherapy does explicitly not contribute to inclusion or exclusion  
11  
12 180 criteria, but will of course be monitored. Inclusion takes place after the staging  
13  
14 181 laparoscopy, and patients will be randomized to the intervention arm (MIG) or the  
15  
16 182 control arm (OG) (**Figure 1**).  
17  
18

19 183  
20

### 21 184 **Trial duration and schedule**

22  
23 185 Recruitment is planned to take 24 months. The duration of the trial for each patient is  
24  
25 186 expected to be 1 month for the primary endpoint and 60 months for the secondary  
26  
27 187 endpoints with long-term follow-up. Consequently, the duration of data collection is  
28  
29 188 expected to be 25 months for the primary endpoint and 84 months for the secondary  
30  
31 189 endpoints [first-patient-in (FPI) to last-patient-out (LPO)]. FPI is planned for September  
32  
33 190 2022 and Last-patient-in (LPI) is planned for September 2024. LPO is consequently  
34  
35 191 planned for September 2029. Trial analysis will take an additional 6 months. The actual  
36  
37 192 overall duration or recruitment time may differ. Recruitment is planned to be active until  
38  
39 193 both arms contain at least 80 patients in the intention-to-treat (ITT) dataset.  
40  
41  
42  
43  
44

45 194

### 46 195 **Trial visits**

47  
48 196 Patients will be monitored intraoperatively, on postoperative days (POD) 1, 3, and 5,  
49  
50 197 and on the day of discharge. Follow-up will be conducted on POD 30, 90, and after  
51  
52 198 postoperative months (POM) 6, 12, 24, 36, 48, and 60 (**Table 1**). Demographic and  
53  
54 199 baseline clinical data, intraoperative findings, and postoperative results will be  
55  
56 200 recorded. During follow-up, patients will complete established and validated  
57  
58 201 questionnaires. To enhance participant retention and to avoid loss to follow-up,  
59  
60



|                                                    |                                                                              |   |  |   |  |   |        |         |
|----------------------------------------------------|------------------------------------------------------------------------------|---|--|---|--|---|--------|---------|
|                                                    | Tumor histopathology****                                                     |   |  | X |  |   |        |         |
| <b>Long-term clinical data (5-year follow-up)</b>  |                                                                              |   |  |   |  |   |        |         |
|                                                    | Changes of body weight                                                       |   |  |   |  | X | X      | X       |
|                                                    | Quality of life (EUROQOL EQ-5D-5L, EORTC QLQ-C30, EORTC QLQ-STO22, ADL, BIS) | X |  |   |  | X | X      | X       |
|                                                    | Incidence of incisional hernias                                              |   |  |   |  |   | X      | X       |
|                                                    | Incidence of reoperations                                                    |   |  | X |  | X | X      | X       |
|                                                    | Incidence of stenosis                                                        |   |  |   |  |   | X      | X       |
|                                                    | Cosmetic results and scar satisfaction (BIS)                                 |   |  |   |  |   |        | X (V13) |
| <b>Oncologic long-term data (5-year follow-up)</b> |                                                                              |   |  |   |  |   |        |         |
|                                                    | Oncologic treatment (adjuvant and consecutive therapy)                       |   |  |   |  |   | X      | X       |
|                                                    | Disease-free survival; DFS; recurrence free survival; RFS                    |   |  |   |  |   | X (V9) | X       |
|                                                    | Local recurrence; LR                                                         |   |  |   |  |   | X (V9) | X       |
|                                                    | Relapse-free survival; RFS                                                   |   |  |   |  |   | X (V9) | X       |
|                                                    | Progression-free survival; PFS                                               |   |  |   |  |   | X (V9) | X       |
|                                                    | Time to progression; TTP                                                     |   |  |   |  |   | X (V9) | X       |
|                                                    | Overall survival; OS                                                         |   |  |   |  |   | X (V9) | X       |

207

208 \* Includes body mass index, ASA status, preoperative oncological status, prior  
 209 surgical treatment, drug use and comorbidities. \*\* Includes surgical documentation  
 210 (surgeons, procedures, complications, drains) & anesthesiology documentation. \*\*\*  
 211 Includes dysphagia, reflux, and dumping syndromes. \*\*\*\* Includes entity, TNM,  
 212 grading, and resection status. ASA American Society of Anesthesiologists  
 213 classification, POD postoperative day, POM postoperative month, CCI  
 214 Comprehensive Complication Index for complications & related interventions  
 215 according to the Clavien-Dindo classification (**Appendix 3**), EDTA  
 216 ethylenediaminetetraacetic acid, need for ICU intermediate / intensive care unit, CRP  
 217 C-reactive protein, EUROQOL EQ-5D-5L EuroQol Group Questionnaire for Quality of  
 218 Life with 5 dimensions and 5 levels, EORTC QLQ-C30 European Organisation for  
 219 Research and Treatment of Cancer Quality of Life Questionnaire Core 30, EORTC  
 220 QLQ-STO22 European Organisation for Research and Treatment of Cancer Quality  
 221 of Life Questionnaire for Gastric Cancer, QoR-15 Quality of Recovery 15, ADLs  
 222 activities of daily living (**Appendix 4**), BIS Body Image Scale, SOP standard  
 223 operating procedure, CA carbohydrate antigen, CEA carcinoembryonic antigen.

224

225

## 226 **Primary endpoint**

227 The primary endpoint will be postoperative morbidity measured using the  
228 Comprehensive Complication Index (CCI) until postoperative day 30 [31]. Usage of  
229 this index will enable a comparison of the severity and individual burden of  
230 postoperative complications with results from other trials [32, 33]. Postoperative  
231 morbidity is defined as any deviation from the normal postoperative course according  
232 to the Clavien-Dindo classification [34]. This includes anastomotic insufficiency or loss  
233 of anastomotic integrity verified by either CT scan with detection of contrast agent  
234 external to the anastomosis, endoscopy, or the detection of methylene blue in a drain  
235 following oral intake.

## 237 **Secondary endpoints**

238 Secondary endpoints can be separated into short-term clinical and oncological  
239 endpoints as well as long-term clinical and oncological endpoints (at 5-year follow-up,  
240 as measured from the date of surgery) and can be found in **Table 1**. Hyperspectral  
241 imaging (HSI) of the surgical site intraoperatively (visit 3) will be performed in  
242 Heidelberg only.

## 244 **Standardized therapy and trial interventions**

245 **Control:** Total OG with D2/D2+ LAD.

246 **Intervention:** Total MIG with D2/D2+ LAD either as LAG or RAG. A mini-laparotomy  
247 or a Pfannenstiel incision ( $\leq 8$  cm incision in both the skin and fascia) may be performed  
248 for specimen removal.

249 Modified cardia-preserving total gastrectomy (preservation of gastroesophageal  
250 junction) can also be accepted, but only if the short gastric vessels are dissected as  
251 well, and if LAD is the same as for total gastrectomy. Besides the open or minimally-

1  
2  
3 252 invasive approach, the remaining treatment is identical in both groups. Any other form  
4  
5 253 of gastrectomy, explicitly conventional subtotal gastrectomy (preserved short gastric  
6  
7 254 vessels and limited LAD of station 2 and 4sa), extended gastrectomy, and distal  
8  
9  
10 255 gastrectomy with Billroth I or II reconstruction are not allowed. Reconstruction can be  
11  
12 256 of any form including Roux-Y reconstruction, interposition, or pouch reconstruction.  
13  
14 257 Any other step of the procedure such as antibiotic prophylaxis, placement of abdominal  
15  
16  
17 258 drains, and closure of the abdominal wall can be performed according to in-house  
18  
19 259 standards. D2 LAD is defined according to the Japanese classification [35], with  
20  
21 260 stations 1, 2, 3a, 3b, 4sa, 4sb, 4d, 5, 6, 7, 8a, 9, 11p, 11d, and 12a obligatory for the  
22  
23  
24 261 MEGA trial (**Figure 2**). Station 10 is optional. Incomplete LAD is not allowed and has  
25  
26 262 to be documented as a protocol deviation.

27  
28 263 Removal of further stations (8b, 12b, 12p, 13, 14v, 14a, 15, 16a1, 16a2, 16b1, 16b2,  
29  
30 264 17, 18, 19, 20, 110, 111, and 112) is allowed when deemed appropriate, e.g., in case  
31  
32  
33 265 of assumed tumor invasion, and has to be documented as D2+.

34  
35 266

### 36 37 267 **Postoperative management**

38  
39 268 Postoperative management should be performed in a fast-track approach with short  
40  
41  
42 269 durations until patient mobilization, drainage removal, and first oralization of food. The  
43  
44  
45 270 patient should be extubated immediately after surgery and transferred to a normal  
46  
47 271 ward, if possible. Further specifications for the postoperative course will be outlined in  
48  
49 272 the provided standard operating procedure (SOP) for fast-track gastrectomy. The last  
50  
51 273 in-hospital trial visit takes place on the day of discharge. Subsequent trial visits will be  
52  
53  
54 274 conducted via telephone. These will be questionnaire-based and focus on CCI (until  
55  
56 275 POD 90), quality of life, and oncologic outcome.

57  
58 276

59  
60 277

## 278 **Randomization and blinding**

279 In order to ensure equal distribution of patient characteristics between both trial arms,  
280 randomization will be performed using a web-based randomization tool  
281 ([www.randomizer.at](http://www.randomizer.at)). Randomization will take place following diagnostic laparoscopy  
282 (Visit 2). The allocation pattern is masked, block-randomized with variable block length,  
283 and stratified across centers. Due to the pragmatic character of the trial, blinding of the  
284 surgeon is not feasible.

## 286 **Quality assurance and quality management**

### 287 **Clinical data monitoring**

288 Clinical monitoring will be performed by independent monitors at the Study Center of  
289 the German Society of Surgery (SDGC). The monitoring strategy will comprise a  
290 combination of centralized and onsite monitoring and will be described in a trial specific  
291 monitoring plan. To confirm site selection, pre-study visits will be performed. On-site  
292 monitoring will focus on patient informed consent, safety, and surgical procedures as  
293 well as the correct recording and documentation of the primary and secondary  
294 endpoints by source data verification (SDV).

### 296 **Surgical quality control**

297 Several steps are necessary to ensure and evaluate surgical quality:

- 298 1) Trial surgeons must have performed 20 surgeries in the respective approach  
299 (OG, LAG, or RAG), depending on the trial arm they will contribute to.
- 300 2) Each trial surgeon must provide photographic or video documentation of a  
301 former procedure.

- 1  
2  
3 302 3) Each trial surgeon has to provide photographic or video documentation of the  
4  
5 303 trial procedures, which will be assessed by an expert. This photographic or  
6  
7 304 video documentation is defined as follows:  
8  
9  
10 305 a. lymph node station 7 (left gastric artery) after dissection  
11  
12 306 b. lymph node station 8a (common hepatic artery) after dissection  
13  
14 307 c. lymph node station 9 (celiac artery) after dissection  
15  
16 308 d. lymph node station 10 (splenic hilum) after dissection  
17  
18 309 e. lymph node station 11p (proximal splenic artery) after dissection  
19  
20 310 f. lymph node station 11d (distal splenic artery) after dissection  
21  
22 311 g. lymph node station 12a (hepatoduodenal ligament along the hepatic  
23  
24 312 artery) after dissection  
25  
26 313 h. duodenal stump  
27  
28 314 i. all anastomoses  
29  
30 315 j. incision for specimen retrieval in MIG  
31  
32  
33  
34  
35  
36  
37  
38  
39

### 317 **Assessment of safety**

40 318 Since the primary endpoint is postoperative complications as measured by the CCI,  
41  
42 319 adverse (AE) and serious adverse events (SAE) are already captured and no  
43  
44 320 additional safety analysis will be performed (**Table 2**).  
45  
46  
47  
48

49 322 **Table 2: Grading of Adverse Events**

| Clavien-Dindo         | Adverse event (AE) | Serious adverse event (SAE) | Minor complication | Major complication |
|-----------------------|--------------------|-----------------------------|--------------------|--------------------|
| Grade I complication  | AE                 |                             | Minor complication |                    |
| Grade II complication |                    |                             |                    |                    |



|                        |  |     |  |                    |
|------------------------|--|-----|--|--------------------|
| Grade III complication |  |     |  |                    |
| Grade IV complication  |  | SAE |  | Major complication |
| Grade V complication   |  |     |  |                    |

323

324

### 325 **Data management**

326 The Institute of Medical Biometry (IMBI) is responsible for data management within this  
 327 trial. An eCRF will be used for data collection. To assure safe and secure data use and  
 328 storage, data transmission is encrypted with secure socket layer (SSL) technology.  
 329 Only authorized users are able to enter or edit data, and access is further restricted to  
 330 data of the patients in that user's respective center only. All changes to data are logged  
 331 with a computerized timestamp in an audit trail. All data will be pseudonymized. To  
 332 guarantee high data quality, data validation rules will be defined in a data validation  
 333 plan. Completeness, validity, and plausibility of data will be checked at the time of data  
 334 entry (edit-checks) and using validating programs, which will generate queries. If no  
 335 further corrections are to be made in the database, eCRF data will be locked. Data will  
 336 finally be downloaded and used for statistical analysis. All data management  
 337 procedures will be conducted according to written defined standard operating  
 338 procedures (SOPs) of the IMBI that guarantee efficient conduct in compliance with  
 339 Good Clinical Practice (GCP). At the end of the study, the data will be transformed into  
 340 different data formats (e.g., csv-files) for archiving and to ensure that it can be re-used.

341

342

343

344

## 345 **Statistical methods**

### 346 **Sample size**

347 The sample size calculation is based on the primary endpoint “postoperative morbidity  
348 as measured with the CCI until POD 30.” A decrease of the CCI by 10 points between  
349 OG and MIG is considered relevant by patients and clinicians, and a conservative  
350 standard deviation of 20 is assumed based on existing literature for upper GI surgery  
351 [36], leading to an effect size of  $d=0.5$ . Based on a t-test with a two-sided significance  
352 level of  $\alpha=0.05$ , a sample size of  $n=128$  patients (64 per group) has to be recruited to  
353 achieve a power of 80%. The primary endpoint will be analyzed with a linear mixed  
354 regression model, which leads to equal or even increased power when compared to a  
355 two-sided t-test. To compensate for drop-outs and patients lost to follow-up, a further  
356 20% of patients will be randomized, leading to a total sample size of  $n=160$  (80 per  
357 group;  $80 \times 0,8 = 64.8$ ). The number of patients to be screened ( $n=400$  to be assessed  
358 for eligibility;  $400 \times 0.5 \times 0.8 = 160$ ) was calculated with an assumed 50% participation  
359 rate and an exclusion rate of 20%.

360 Randomized & allocated ( $n = 160$ ; 80 per group)

361 Intention-to-treat dataset ( $n = 160$ ; 80 per group)

362 Per-protocol dataset ( $n = 136$ ; 72 and 64)

363

### 364 **Statistical analysis**

365 For the examination of the primary endpoint “postoperative morbidity measured with  
366 the CCI until POD 30,” the hypotheses to be assessed in the primary analysis are as  
367 follows:  $H_0: \mu_1 = \mu_2$  vs  $H_1: \mu_1 \neq \mu_2$ , where  $\mu_1$  and  $\mu_2$  denote the mean CCI in the control  
368 and intervention groups, respectively. The significance level is set to a two-sided  
369  $\alpha=0.05$ . Therefore, the primary endpoint will be examined using a linear mixed model  
370 adjusting for the variables age and treatment group, as well as the surgical center as

1  
2  
3 371 a random effect (due to the stratified randomization and relatively large number of  
4  
5 372 centers in relation to the sample size, inclusion of center as a random effect is  
6  
7 373 recommended). Details of the primary model (e.g., handling of missing values,  
8  
9 374 sensitivity analyses) will be fully described in the statistical analysis plan.

10 375 The number of patients included in the primary analysis is determined as the full  
11  
12 376 analysis set. Patients will be analyzed in the group they were randomized to (converted  
13  
14 377 patients remain in their group). This reflects an analysis according to the intention to  
15  
16 378 treat (ITT) principle. Specific events (e.g., death) that can occur after randomization  
17  
18 379 will be handled within the primary endpoint definition, reflecting a composite strategy  
19  
20 380 [according to the ICH E9 (R1) addendum]. Other post randomization events will not be  
21  
22 381 considered. This choice reflects our treatment policy approach.

23  
24 382 In general, for the full analysis set, all baseline values and secondary outcomes will be  
25  
26 383 evaluated descriptively, with p-values reported alongside 95% confidence intervals for  
27  
28 384 the corresponding effects. Furthermore, secondary endpoints will be evaluated  
29  
30 385 descriptively, using appropriate regression models. Time-to-event endpoints will be  
31  
32 386 evaluated by methods of survival analysis including Kaplan-Meier methods and Cox  
33  
34 387 proportional hazards models. In addition, subgroup analyses (including age, gender,  
35  
36 388 tumor stage, tumor grade, histological tumor type, linear vs. circular stapler for proximal  
37  
38 389 anastomosis, linear vs. hand-sewn for distal anastomosis, type of retrieval incision,  
39  
40 390 and intraoperative conversion) will be carried out. A detailed and comprehensive  
41  
42 391 statistical analysis plan will be written shortly after the first patient is recruited. All  
43  
44 392 analyses will be performed using SAS version 9.4 or higher.

45  
46 393

## 47 394 **Discussion**

48 395 We performed a systematic literature search prior to planning this trial and identified  
49  
50 396 974 publications. Of those, 17 RCTs comparing LAG with OG [7, 37-55] and two RCTs

1  
2  
3 397 comparing RAG with OG [56, 57] were found to be relevant. The studies showed  
4  
5 398 comparable oncologic and short-term postoperative outcomes for MIG and OG.  
6  
7 399 However, 16 of the 19 studies were conducted in China, Korea, and Japan [7, 38-50,  
8  
9 400 56, 57]. These countries have a significantly higher incidence of gastric cancer, which  
10  
11 401 consequently leads to significantly higher surgical volume and expertise among the  
12  
13 402 participating centers [58]. In addition, the body constitution of Asian patients is often  
14  
15 403 different from that of Western patients, which limits the direct transferability of study  
16  
17 404 results. Also, the incidence of gastric cancer is lower in Western populations and  
18  
19 405 advanced disease stages are more frequently detected, because screening is less  
20  
21 406 common. Therefore, it is unclear whether these results would be reproducible in a  
22  
23 407 Western population.

24  
25  
26  
27  
28 408 Currently, there have only been three non-Asian RCTs directly comparing LAG and  
29  
30 409 OG. The first RCT, by Huscher et al., focused exclusively on distal gastrectomy, did  
31  
32 410 not define any specific primary or secondary endpoints, and included a total of 59  
33  
34 411 patients [37]. Due to the missing differentiation between primary and secondary  
35  
36 412 endpoints, the trial can be perceived as methodically limited and was most likely  
37  
38 413 underpowered. However, no significant difference was found in perioperative outcome,  
39  
40 414 oncologic outcome, or mortality [morbidity rates: 26.7% (LAG) and 27.6% (OG), lymph  
41  
42 415 nodes harvested:  $30.0 \pm 14.9$  (LAG) and  $33.4 \pm 17.4$  (OG), operative mortality rates:  
43  
44 416 3.3% (LG) and 6.7% (OG), 5-year survival rate: 54.8% (LAG) and 55.7% (OG)].

45  
46  
47  
48  
49 417 The only two currently existing relevant Western multicenter RCTs comparing open  
50  
51 418 versus minimally invasive oncologic total gastrectomy are the LOGICA trial [52, 53]  
52  
53 419 and the STOMACH trial [51, 54, 55], which were both published in 2021.

54  
55  
56 420 The LOGICA trial is a non-blinded, multicenter superiority trial with 227 patients with  
57  
58 421 postoperative hospital stay as the primary endpoint. The study identified significant  
59  
60 422 differences regarding blood loss [150 ml (LAG) and 300 ml (OG),  $p < 0.001$ ] and

1  
2  
3 423 operating time [216 min (LAG) and 182 min (OG),  $p < 0.001$ ], but no significant  
4  
5 424 differences in hospital stay ( $p = 0.34$ ), postoperative complications [44% (LAG) and 42%  
6  
7 425 (OG),  $p = 0.91$ ], in-hospital mortality [4% (LAG) and 7% (OG),  $p = 0.40$ ], R0 resections  
8  
9 426 [95% (LAG) and 95% (OG),  $p = 1.00$ ], median lymph node yield [29 (LAG) and 29 (OG),  
10  
11 427  $p = 0.49$ ], 1-year overall survival [76% (LAG) and 78% (OG),  $p = 0.74$ ], and health-related  
12  
13 428 quality of life [+1.5 (LAG) and +3.6 (OG) on a 1-100 scale].

14  
15  
16  
17 429 The STOMACH trial is an observer-blinded, multicenter, non-inferiority trial with 96  
18  
19 430 patients following neoadjuvant chemotherapy with quality of oncological resection  
20  
21 431 (radicality of surgery and number of retrieved lymph nodes) as the primary endpoint.  
22  
23 432 Mean number of resected lymph nodes [41.7±16.1 (LAG) and 43.4±17.3 (OG),  
24  
25 433  $p = 0.612$ ], number of R0 resections (44/47 (LAG) and 48/49 (OG),  $p = 0.617$ ], 1-year  
26  
27 434 survival (85.5% (LAG) and 90.4% (OG),  $p = 0.701$ ], postoperative complications [16/47  
28  
29 435 (LAG) and 21/49 (OG),  $p = 0.408$ ], and postoperative QoL [measured with EQ5D,  
30  
31 436 EORTC-QLQ-C30, and EORTC-QLQ-STO22] were not significantly different.

32  
33  
34  
35 437 In a regular setting with a diagnosed carcinoma, patients should usually be advised to  
36  
37 438 make their decision for or against a certain treatment option with regards to a  
38  
39 439 combination of highest expected overall survival and simultaneous conservation of  
40  
41 440 long-term QoL. Short-term postoperative complications should only be treated as  
42  
43 441 secondary deciding factors. However, if postoperative complications might impair long-  
44  
45 442 term QoL or even overall survival, they become equally relevant. In general,  
46  
47 443 postoperative complications can have negative effects on QoL or overall survival;  
48  
49 444 however, this is much more the case for gastric cancer, as time to continuation of  
50  
51 445 peroperative chemotherapy can be prolonged and the prognosis therefore worsened.  
52  
53 446 The STOMACH trial provides evidence that MIG is non-inferior to OG in terms of  
54  
55 447 oncologic quality of resection, which is a necessary requirement for the MEGA trial, as  
56  
57  
58  
59  
60

1  
2  
3 448 postoperative morbidity and complications can only be decisive factors in the case of  
4  
5 449 oncological non-inferiority for an oncological resection with curative intent.

6  
7 450 While both the STOMACH and LOGICA trials suggest that postoperative complications  
8  
9 451 might not be significantly different between both groups, a premature confirmative  
10  
11 452 statement must be avoided as complications have only been investigated as  
12  
13 453 secondary endpoints so far. Consequently, a multicenter RCT comparing total MIG  
14  
15 454 and OG for gastric cancer in terms of postoperative complications is needed to decide  
16  
17 455 whether MIG should be established as the new standard treatment for resectable  
18  
19 456 gastric cancer in Europe.

20  
21  
22  
23 457 The MEGA trial has strict quality control measures and will be conducted in line with  
24  
25 458 all relevant guidelines. Therefore, it will provide the highest level of evidence on this  
26  
27 459 very relevant clinical research question.

28  
29  
30  
31 460

### 32 33 461 **Ethics and dissemination**

34  
35 462 The MEGA trial conforms to the Declaration of Helsinki [59]. The Independent Ethics  
36  
37 463 Committee of the Medical Faculty, University of Heidelberg, approved the MEGA trial  
38  
39 464 protocol (registration number S-816/2021). For other trial centers, recruitment will only  
40  
41 465 be initiated after receiving approval from their respective local ethics committees.

42  
43 466 **Additional file 1** provides the SPIRIT checklist for interventional trials [60].

44  
45  
46 467 Study objectives and procedures will be communicated clearly to all qualifying patients  
47  
48 468 and written informed consent will be obtained from those who agree to participate.

49  
50 469 Results will be presented at scientific meetings and published in international peer-  
51  
52 470 reviewed journals. Summaries will be provided to the funders of the study and results  
53  
54 471 will be published in open-access journals.

55  
56  
57 472

58  
59  
60 473

1  
2  
3 474 **Patient and Public Involvement**  
4

5 475 Patients are involved in the design and conduction of this trial. Priority of the research  
6  
7 476 question, outcome measures, and recruitment methods were discussed with patients  
8  
9 477 during the initial planning stage. Patients have stated an uneventful postoperative  
10  
11 478 course as a very notable feature, and every possible intervention contributing to lower  
12  
13 479 postoperative morbidity was rated to be of great importance.  
14

15  
16 480 The chairman of one of Germany's largest patient self-aid groups concerning minimally  
17  
18 481 invasive surgery (SHG Frankfurt Sachsenhausen) will be a member of the data safety  
19  
20 482 and monitoring board as a patient representative. Therefore, this study will continue to  
21  
22 483 take the patient's perspective into account.  
23  
24  
25

26 484  
27  
28 485 **Modification of the protocol**  
29

30 486 The current protocol version (1.2) will be utilized during trial initiation. In case of  
31  
32 487 protocol amendments, these will be submitted to the relevant ethics committees for  
33  
34 488 approval.  
35  
36  
37

38 489  
39  
40 490 **Additional file**

41  
42 491 **Additional file 1:** SPIRIT checklist.  
43  
44  
45 492

46  
47 493 **Abbreviations**  
48

|              |      |                                                      |
|--------------|------|------------------------------------------------------|
| 49 494       | ADLs | Activities of daily living                           |
| 50<br>51 495 | AE   | Adverse event                                        |
| 52<br>53 496 | AEG  | Adenocarcinoma of esophagogastric junction           |
| 54<br>55 497 | ASA  | American Society of Anesthesiologists Classification |
| 56<br>57 498 | BIS  | Body Image Scale                                     |
| 58<br>59 499 | BMBF | Federal Ministry of Education and Research           |
| 60           |      |                                                      |



|    |     |                  |                                                         |
|----|-----|------------------|---------------------------------------------------------|
| 1  |     |                  |                                                         |
| 2  |     |                  |                                                         |
| 3  | 500 | CA               | Carbohydrate antigen                                    |
| 4  |     |                  |                                                         |
| 5  | 501 | CEA              | Carcinoembryonic antigen                                |
| 6  |     |                  |                                                         |
| 7  | 502 | CCI              | Comprehensive Complication Index according to Clavien-  |
| 8  |     |                  |                                                         |
| 9  |     |                  |                                                         |
| 10 | 503 |                  | Dindo classification                                    |
| 11 |     |                  |                                                         |
| 12 | 504 | eCRF             | Electronic Case Report Forms                            |
| 13 |     |                  |                                                         |
| 14 | 505 | CRP              | C-reactive protein                                      |
| 15 |     |                  |                                                         |
| 16 |     |                  |                                                         |
| 17 | 506 | DALY             | Disability-adjusted life years                          |
| 18 |     |                  |                                                         |
| 19 | 507 | DRKS             | Deutsches Register Klinischer Studien (German Clinical  |
| 20 |     |                  |                                                         |
| 21 |     |                  |                                                         |
| 22 | 508 |                  | Trials Register)                                        |
| 23 |     |                  |                                                         |
| 24 | 509 | DSMB             | Data Safety and Monitoring Board                        |
| 25 |     |                  |                                                         |
| 26 | 510 | EORTC QLQ-C30    | European Organisation for Research and Treatment of     |
| 27 |     |                  |                                                         |
| 28 | 511 |                  | Cancer Quality of Life Questionnaire Core 30            |
| 29 |     |                  |                                                         |
| 30 | 512 | EORTC QLQ-STO22  | European Organisation for Research and Treatment of     |
| 31 |     |                  |                                                         |
| 32 |     |                  |                                                         |
| 33 | 513 |                  | Cancer Quality of Life Questionnaire for Gastric Cancer |
| 34 |     |                  |                                                         |
| 35 | 514 | EUROQOL EQ-5D-5L | EuroQol Group Questionnaire for Quality of Life with 5  |
| 36 |     |                  |                                                         |
| 37 |     |                  |                                                         |
| 38 | 515 |                  | dimensions and 5 levels                                 |
| 39 |     |                  |                                                         |
| 40 | 516 | FPI              | First-patient-in                                        |
| 41 |     |                  |                                                         |
| 42 | 517 | FU               | Follow-up                                               |
| 43 |     |                  |                                                         |
| 44 | 518 | GCP              | Good Clinical Practice                                  |
| 45 |     |                  |                                                         |
| 46 |     |                  |                                                         |
| 47 | 519 | ICH              | International Council for Harmonisation of Technical    |
| 48 |     |                  |                                                         |
| 49 | 520 |                  | Requirements for Pharmaceuticals for Human Use          |
| 50 |     |                  |                                                         |
| 51 | 521 | ICU              | Intermediate / intensive care unit                      |
| 52 |     |                  |                                                         |
| 53 |     |                  |                                                         |
| 54 | 522 | IMBI             | Institute of Medical Biometry                           |
| 55 |     |                  |                                                         |
| 56 | 523 | ITT              | Intention-to-treat                                      |
| 57 |     |                  |                                                         |
| 58 | 524 | LAG              | Laparoscopic gastrectomy                                |
| 59 |     |                  |                                                         |
| 60 | 525 | LPI              | Last-patient-in                                         |



|    |     |                                                                                         |                                               |
|----|-----|-----------------------------------------------------------------------------------------|-----------------------------------------------|
| 1  |     |                                                                                         |                                               |
| 2  |     |                                                                                         |                                               |
| 3  | 526 | LPO                                                                                     | Last-patient-out                              |
| 4  |     |                                                                                         |                                               |
| 5  | 527 | MIG                                                                                     | Minimally invasive gastrectomy                |
| 6  |     |                                                                                         |                                               |
| 7  | 528 | OG                                                                                      | Open gastrectomy                              |
| 8  |     |                                                                                         |                                               |
| 9  |     |                                                                                         |                                               |
| 10 | 529 | POD                                                                                     | Postoperative day                             |
| 11 |     |                                                                                         |                                               |
| 12 | 530 | POM                                                                                     | Postoperative month                           |
| 13 |     |                                                                                         |                                               |
| 14 | 531 | PRO                                                                                     | Patient-reported outcome                      |
| 15 |     |                                                                                         |                                               |
| 16 | 532 | QoL                                                                                     | Quality of life                               |
| 17 |     |                                                                                         |                                               |
| 18 | 533 | QoR-15                                                                                  | Quality of Recovery 15 questionnaire          |
| 19 |     |                                                                                         |                                               |
| 20 | 534 | RAG                                                                                     | Robotic-assisted gastrectomy                  |
| 21 |     |                                                                                         |                                               |
| 22 | 535 | RCT                                                                                     | Randomized controlled trial                   |
| 23 |     |                                                                                         |                                               |
| 24 | 536 | SAE                                                                                     | Serious adverse event                         |
| 25 |     |                                                                                         |                                               |
| 26 | 537 | SDGC                                                                                    | Study Center of the German Society of Surgery |
| 27 |     |                                                                                         |                                               |
| 28 | 538 | SDV                                                                                     | Source data verification                      |
| 29 |     |                                                                                         |                                               |
| 30 | 539 | SOP                                                                                     | Standard operating procedure                  |
| 31 |     |                                                                                         |                                               |
| 32 | 540 | V                                                                                       | Visit                                         |
| 33 |     |                                                                                         |                                               |
| 34 |     |                                                                                         |                                               |
| 35 |     |                                                                                         |                                               |
| 36 |     |                                                                                         |                                               |
| 37 |     |                                                                                         |                                               |
| 38 |     |                                                                                         |                                               |
| 39 |     |                                                                                         |                                               |
| 40 | 541 |                                                                                         |                                               |
| 41 |     |                                                                                         |                                               |
| 42 | 542 | <b>Acknowledgements</b>                                                                 |                                               |
| 43 |     |                                                                                         |                                               |
| 44 | 543 | The authors gratefully acknowledge the Study Center of the German Society of            |                                               |
| 45 | 544 | Surgery (SDGC) in the Department of General, Visceral, and Transplantation Surgery      |                                               |
| 46 | 545 | at Heidelberg University Hospital for its assistance in coordinating this RCT. We would |                                               |
| 47 | 546 | also like to thank the other centers that have committed to participating in the trial. |                                               |
| 48 |     |                                                                                         |                                               |
| 49 | 547 |                                                                                         |                                               |
| 50 |     |                                                                                         |                                               |
| 51 |     |                                                                                         |                                               |
| 52 |     |                                                                                         |                                               |
| 53 | 548 | <b>Funding statement</b>                                                                |                                               |
| 54 |     |                                                                                         |                                               |
| 55 | 549 | The MEGA trial is funded by the Federal Ministry of Education and Research (BMBF),      |                                               |
| 56 | 550 | funding number 01KG2029. All trial aspects will be performed independently from the     |                                               |
| 57 |     |                                                                                         |                                               |
| 58 | 551 | funding source, including trial design and conduction, analysis, and interpretation of  |                                               |
| 59 |     |                                                                                         |                                               |
| 60 |     |                                                                                         |                                               |

1  
2  
3 552 data, as well as submission of the report for publication. The funder does not have any  
4  
5 553 influence in study design or collection, management, analysis, and interpretation of  
6  
7 554 data.  
8  
9

10 555

### 11 556 **Authors' contributions**

12  
13  
14 557 FN and ASF have contributed equally as first authors. BPMS, FN and ASF developed  
15  
16 558 the original concept of the trial and applied for funding. FN, ASF, DH, CK, MF, SZ and  
17  
18 559 BPMS developed the design and methodology. BPMS and FN recruited all  
19  
20 560 participating trial centers. FN, ASF, CK, MF, SZ and BPMS performed initial statistical  
21  
22 561 steps to develop the analysis plan. FN, ASF, RK, SVA, ST, PP, AB and HN contributed  
23  
24 562 to drafting the protocol. DH, CK, MF, SZ, BB, FB, CB, IG, SG, PG, CG, JH, KL, LM,  
25  
26 563 SM, DR, FS, DS, PP, TS and BPMS contributed to the revision of the final protocol. All  
27  
28 564 authors have read and approved of the final manuscript.  
29  
30  
31  
32

33 565

### 34 566 **Responsibilities**

35  
36  
37 567 Prof. Dr. Müller-Stich, Coordinating Investigator, is involved in every aspect of the trial  
38  
39 568 and has ultimate authority over study design, data collection, interpretation of data,  
40  
41 569 and oversight of the intermittent and final written reports. PD Dr. Nickel, MME, is  
42  
43 570 Deputy Coordinating Investigator. Alexander Studier-Fischer, MD, is Trial Organizer.  
44  
45 571 The Clinical Trial Committee consists of the Coordinating Investigator, the Deputy  
46  
47 572 Coordinating Investigator, and the Trial Organizer, originating from the Division of  
48  
49 573 Minimally Invasive and Robotic-assisted Surgery in the Department of General,  
50  
51 574 Visceral, and Transplantation Surgery at Heidelberg University Hospital. To ensure  
52  
53 575 objectivity, the third-party Institute of Medical Biometry (IMBI) is responsible for data  
54  
55 576 management, statistical planning, and analysis. Project management and monitoring  
56  
57 577 are handled by the SDGC (Study Center of the German Society of Surgery), in  
58  
59  
60

1  
2  
3 578 Heidelberg. Additionally, a Data Safety and Monitoring Board (DSMB) consisting of  
4  
5 579 independent experts will advise on the continuation, modification, or termination of the  
6  
7 580 trial and a steering committee will supervise the conduction of the trial and make  
8  
9 581 decisions based on DSMB recommendations.  
10  
11

12 582

### 14 583 **Data availability**

16 584 The full protocol, results and statistical code will be made available by the  
17  
18 585 corresponding authors upon reasonable request.  
19  
20

21 586

### 23 587 **Conflict of interest statements**

25 588 The authors declare that they have no conflicts of interest or relevant financial ties to  
26  
27 589 disclose. Felix Nickel reports support for courses and travel from Johnson and  
28  
29 590 Johnson, Medtronic, Intuitive Surgical, Cambridge Medical Robotics, and KARL  
30  
31 591 STORZ as well as consultancy fees from KARL STORZ.  
32  
33

34 592

### 36 593 **References**

- 37  
38  
39 594 1. Bray, F., et al., *Global cancer statistics 2018: GLOBOCAN estimates of*  
40  
41 595 *incidence and mortality worldwide for 36 cancers in 185 countries*. CA Cancer J Clin,  
42  
43 596 2018. **68**(6): p. 394-424.  
44  
45 597 2. Soerjomataram, I., et al., *Global burden of cancer in 2008: a systematic*  
46  
47 598 *analysis of disability-adjusted life-years in 12 world regions*. Lancet, 2012. **380**(9856):  
48  
49 599 p. 1840-50.  
50  
51 600 3. Fitzmaurice, C., et al., *Global, Regional, and National Cancer Incidence,*  
52  
53 601 *Mortality, Years of Life Lost, Years Lived With Disability, and Disability-Adjusted Life-*  
54  
55 602 *years for 32 Cancer Groups, 1990 to 2015: A Systematic Analysis for the Global*  
56  
57 603 *Burden of Disease Study*. JAMA Oncol, 2017. **3**(4): p. 524-548.  
58  
59  
60

- 1  
2  
3 604 4. Selby, L.V., et al., *Morbidity after Total Gastrectomy: Analysis of 238 Patients.*  
4  
5 605 *Journal of the American College of Surgeons*, 2015. **220**(5): p. 863-871.e2.  
6  
7 606 5. Karimi, P., et al., *Gastric cancer: descriptive epidemiology, risk factors,*  
8  
9 607 *screening, and prevention.* *Cancer Epidemiol Biomarkers Prev*, 2014. **23**(5): p. 700-  
10  
11 608 13.  
12  
13  
14 609 6. Van Cutsem, E., et al., *Gastric cancer.* *Lancet*, 2016. **388**(10060): p. 2654-  
15  
16 610 2664.  
17  
18  
19 611 7. Kim, W., et al., *Decreased Morbidity of Laparoscopic Distal Gastrectomy*  
20  
21 612 *Compared With Open Distal Gastrectomy for Stage I Gastric Cancer: Short-term*  
22  
23 613 *Outcomes From a Multicenter Randomized Controlled Trial (KLASS-01).* *Ann Surg*,  
24  
25 614 2016. **263**(1): p. 28-35.  
26  
27  
28 615 8. Fuchs, H., et al., *Operative Fallzahlen beeinflussen die Mortalität nach*  
29  
30 616 *Gastrektomie erheblich – eine Analyse des U.S. Nationwide Inpatient Sample.*  
31  
32  
33 617 9. Pacelli, F., et al., *Four hundred consecutive total gastrectomies for gastric*  
34  
35 618 *cancer: a single-institution experience.* *Arch Surg*, 2008. **143**(8): p. 769-75;  
36  
37 619 discussion 775.  
38  
39  
40 620 10. Bartlett, E.K., et al., *Morbidity and mortality after total gastrectomy for gastric*  
41  
42 621 *malignancy using the American College of Surgeons National Surgical Quality*  
43  
44 622 *Improvement Program database.* *Surgery*, 2014. **156**(2): p. 298-304.  
45  
46  
47 623 11. Papenfuss, W.A., et al., *Morbidity and mortality associated with gastrectomy*  
48  
49 624 *for gastric cancer.* *Ann Surg Oncol*, 2014. **21**(9): p. 3008-14.  
50  
51  
52 625 12. Dhir, M., et al., *A preoperative nomogram to predict the risk of perioperative*  
53  
54 626 *mortality following gastric resections for malignancy.* *J Gastrointest Surg*, 2012.  
55  
56 627 **16**(11): p. 2026-36.  
57  
58 628 13. Edwards, P., et al., *Prospective comparison of D1 vs modified D2 gastrectomy*  
59  
60 629 *for carcinoma.* *Br J Cancer*, 2004. **90**(10): p. 1888-92.

- 1  
2  
3 630 14. Finlayson, E.V., P.P. Goodney, and J.D. Birkmeyer, *Hospital volume and*  
4  
5 631 *operative mortality in cancer surgery: a national study*. Arch Surg, 2003. **138**(7): p.  
6  
7 632 721-5; discussion 726.
- 8  
9  
10 633 15. Smith, J.W., et al., *Morbidity of radical lymphadenectomy in the curative*  
11  
12 634 *resection of gastric carcinoma*. Arch Surg, 1991. **126**(12): p. 1469-73.
- 13  
14 635 16. Harrison, L.E., M.S. Karpeh, and M.F. Brennan, *Proximal gastric cancers*  
15  
16 636 *resected via a transabdominal-only approach. Results and comparisons to distal*  
17  
18 637 *adenocarcinoma of the stomach*. Ann Surg, 1997. **225**(6): p. 678-83; discussion 683-  
19  
20 638 5.
- 21  
22  
23 639 17. Noguchi, Y., et al., *Is gastric carcinoma different between Japan and the*  
24  
25 640 *United States?* Cancer, 2000. **89**(11): p. 2237-46.
- 26  
27  
28 641 18. Li, H.Z., et al., *Laparoscopic-assisted versus open radical gastrectomy for*  
29  
30 642 *resectable gastric cancer: Systematic review, meta-analysis, and trial sequential*  
31  
32 643 *analysis of randomized controlled trials*. J Surg Oncol, 2016. **113**(7): p. 756-67.
- 33  
34  
35 644 19. Yamada, H., et al., *Effect of obesity on technical feasibility and postoperative*  
36  
37 645 *outcomes of laparoscopy-assisted distal gastrectomy--comparison with open distal*  
38  
39 646 *gastrectomy*. J Gastrointest Surg, 2008. **12**(6): p. 997-1004.
- 40  
41  
42 647 20. Lacy, A.M., et al., *Laparoscopy-assisted colectomy versus open colectomy for*  
43  
44 648 *treatment of non-metastatic colon cancer: a randomised trial*. Lancet, 2002.  
45  
46 649 **359**(9325): p. 2224-9.
- 47  
48  
49 650 21. van der Pas, M.H., et al., *Laparoscopic versus open surgery for rectal cancer*  
50  
51 651 *(COLOR II): short-term outcomes of a randomised, phase 3 trial*. Lancet Oncol, 2013.  
52  
53 652 **14**(3): p. 210-8.
- 54  
55  
56 653 22. Müller-Stich, B.P., et al., *Meta-analysis of randomized controlled trials and*  
57  
58 654 *individual patient data comparing minimally invasive with open oesophagectomy for*  
59  
60 655 *cancer*. British Journal of Surgery, 2021.

- 1  
2  
3 656 23. Lee, H.J., et al., *Short-term Outcomes of a Multicenter Randomized Controlled*  
4  
5 657 *Trial Comparing Laparoscopic Distal Gastrectomy With D2 Lymphadenectomy to*  
6  
7 658 *Open Distal Gastrectomy for Locally Advanced Gastric Cancer (KLASS-02-RCT).*  
9  
10 659 *Ann Surg*, 2019. **270**(6): p. 983-991.  
11  
12 660 24. Jaschinski, T., et al., *Laparoscopic versus open surgery for suspected*  
13  
14 661 *appendicitis.* *Cochrane Database Syst Rev*, 2018. **11**(11): p. Cd001546.  
16  
17 662 25. Law, W.L., et al., *The Impact of Postoperative Complications on Long-Term*  
18  
19 663 *Outcomes Following Curative Resection for Colorectal Cancer.* *Annals of Surgical*  
20  
21 664 *Oncology*, 2007. **14**(9): p. 2559-2566.  
23  
24 665 26. Chok, K.S., et al., *Impact of postoperative complications on long-term outcome*  
25  
26 666 *of curative resection for hepatocellular carcinoma.* *British Journal of Surgery*, 2008.  
27  
28 667 **96**(1): p. 81-87.  
30  
31 668 27. Kamphues, C., et al., *Postoperative Complications Deteriorate Long-Term*  
32  
33 669 *Outcome in Pancreatic Cancer Patients.* *Annals of Surgical Oncology*, 2012. **19**(3): p.  
34  
35 670 856-863.  
37  
38 671 28. Li, Q.-G., et al., *Impact of postoperative complications on long-term survival*  
39  
40 672 *after radical resection for gastric cancer.* *World journal of gastroenterology*, 2013.  
41  
42 673 **19**(25): p. 4060-4065.  
44  
45 674 29. *DRKS Trial document. Accessed 8th of April 2020.*  
46  
47 675 [https://www.drks.de/drks\\_web/navigate.do?navigationId=trial.HTML&TRIAL\\_ID=DRK](https://www.drks.de/drks_web/navigate.do?navigationId=trial.HTML&TRIAL_ID=DRK)  
48  
49 676 [S00016773](https://www.drks.de/drks_web/navigate.do?navigationId=trial.HTML&TRIAL_ID=DRK).  
51  
52 677 30. Chan, A.W., et al., *SPIRIT 2013 Statement: defining standard protocol items*  
53  
54 678 *for clinical trials.* *Rev Panam Salud Publica*, 2015. **38**(6): p. 506-14.  
55  
56 679 31. Slankamenac, K., et al., *The Comprehensive Complication Index: A Novel and*  
57  
58 680 *More Sensitive Endpoint for Assessing Outcome and Reducing Sample Size in*  
59  
60 681 *Randomized Controlled Trials.* *Annals of Surgery*, 2014. **260**(5): p. 757-763.

- 1  
2  
3 682 32. Slankamenac, K., et al., *The comprehensive complication index: a novel*  
4  
5 683 *continuous scale to measure surgical morbidity*. *Ann Surg*, 2013. **258**(1): p. 1-7.  
6  
7 684 33. Nickel, F., et al., *Minimally Invasive Versus open AbdominoThoracic*  
8  
9 685 *Esophagectomy for esophageal carcinoma (MIVATE) - study protocol for a*  
10  
11 686 *randomized controlled trial DRKS00016773*. *Trials*, 2021. **22**(1): p. 41.  
12  
13 687 34. Dindo, D., N. Demartines, and P.-A. Clavien, *Classification of surgical*  
14  
15 688 *complications: a new proposal with evaluation in a cohort of 6336 patients and*  
16  
17 689 *results of a survey*. *Annals of surgery*, 2004. **240**(2): p. 205-213.  
18  
19 690 35. Japanese Gastric Cancer, A., *Japanese classification of gastric carcinoma:*  
20  
21 691 *3rd English edition*. *Gastric Cancer*, 2011. **14**(2): p. 101-112.  
22  
23 692 36. Ma, G., et al., *Comparison of the short-term clinical outcome between open*  
24  
25 693 *and minimally invasive esophagectomy by comprehensive complication index*. *J*  
26  
27 694 *Cancer Res Ther*, 2018. **14**(4): p. 789-794.  
28  
29 695 37. Huscher, C.G., et al., *Laparoscopic versus open subtotal gastrectomy for*  
30  
31 696 *distal gastric cancer: five-year results of a randomized prospective trial*. *Ann Surg*,  
32  
33 697 2005. **241**(2): p. 232-7.  
34  
35 698 38. Cai, J., et al., *A prospective randomized study comparing open versus*  
36  
37 699 *laparoscopy-assisted D2 radical gastrectomy in advanced gastric cancer*. *Dig Surg*,  
38  
39 700 2011. **28**(5-6): p. 331-7.  
40  
41 701 39. Cui, M., et al., *A prospective randomized clinical trial comparing D2 dissection*  
42  
43 702 *in laparoscopic and open gastrectomy for gastric cancer*. *Med Oncol*, 2015. **32**(10):  
44  
45 703 p. 241.  
46  
47 704 40. Kitano, S., et al., *A randomized controlled trial comparing open vs*  
48  
49 705 *laparoscopy-assisted distal gastrectomy for the treatment of early gastric cancer: an*  
50  
51 706 *interim report*. *Surgery*, 2002. **131**(1 Suppl): p. S306-11.  
52  
53  
54  
55  
56  
57  
58  
59  
60



- 1  
2  
3 707 41. Lee, J.H., H.S. Han, and J.H. Lee, *A prospective randomized study comparing*  
4  
5 708 *open vs laparoscopy-assisted distal gastrectomy in early gastric cancer: early results.*  
6  
7 709 *Surg Endosc*, 2005. **19**(2): p. 168-73.
- 9  
10 710 42. Jiang, L., et al., *Laparoscopy-assisted gastrectomy versus open gastrectomy*  
11  
12 711 *for resectable gastric cancer: an update meta-analysis based on randomized*  
13  
14 712 *controlled trials.* *Surg Endosc*, 2013. **27**(7): p. 2466-80.
- 16  
17 713 43. Kim, H.H., et al., *Prospective randomized controlled trial (phase III) to*  
18  
19 714 *comparing laparoscopic distal gastrectomy with open distal gastrectomy for gastric*  
20  
21 715 *adenocarcinoma (KLASS 01).* *J Korean Surg Soc*, 2013. **84**(2): p. 123-30.
- 23  
24 716 44. Kim, Y.W., et al., *Long-term outcomes of laparoscopy-assisted distal*  
25  
26 717 *gastrectomy for early gastric cancer: result of a randomized controlled trial (COACT*  
27  
28 718 *0301).* *Surg Endosc*, 2013. **27**(11): p. 4267-76.
- 30  
31 719 45. Yamashita, K., et al., *Laparoscopic versus open distal gastrectomy for early*  
32  
33 720 *gastric cancer in Japan: long-term clinical outcomes of a randomized clinical trial.*  
34  
35 721 *Surg Today*, 2016. **46**(6): p. 741-9.
- 37  
38 722 46. Hyung, W.J., et al., *A feasibility study of laparoscopic total gastrectomy for*  
39  
40 723 *clinical stage I gastric cancer: a prospective multi-center phase II clinical trial, KLASS*  
41  
42 724 *03.* *Gastric Cancer*, 2019. **22**(1): p. 214-222.
- 44  
45 725 47. Takiguchi, S., et al., *Laparoscopy-assisted distal gastrectomy versus open*  
46  
47 726 *distal gastrectomy. A prospective randomized single-blind study.* *World J Surg*, 2013.  
48  
49 727 **37**(10): p. 2379-86.
- 51  
52 728 48. Wang, Z., et al., *Short-term surgical outcomes of laparoscopy-assisted versus*  
53  
54 729 *open D2 distal gastrectomy for locally advanced gastric cancer in North China: a*  
55  
56 730 *multicenter randomized controlled trial.* *Surg Endosc*, 2019. **33**(1): p. 33-45.
- 57  
58  
59  
60



- 1  
2  
3 731 49. Hu, Y., et al., *Morbidity and Mortality of Laparoscopic Versus Open D2 Distal*  
4  
5 732 *Gastrectomy for Advanced Gastric Cancer: A Randomized Controlled Trial*. J Clin  
6  
7 733 Oncol, 2016. **34**(12): p. 1350-7.  
8  
9  
10 734 50. Hayashi, H., et al., *Prospective randomized study of open versus laparoscopy-*  
11  
12 735 *assisted distal gastrectomy with extraperigastric lymph node dissection for early*  
13  
14 736 *gastric cancer*. Surg Endosc, 2005. **19**(9): p. 1172-6.  
15  
16  
17 737 51. Straatman, J., et al., *Surgical techniques, open versus minimally invasive*  
18  
19 738 *gastrectomy after chemotherapy (STOMACH trial): study protocol for a randomized*  
20  
21 739 *controlled trial*. Trials, 2015. **16**: p. 123.  
22  
23  
24 740 52. Haverkamp, L., et al., *Laparoscopic versus open gastrectomy for gastric*  
25  
26 741 *cancer, a multicenter prospectively randomized controlled trial (LOGICA-trial)*. BMC  
27  
28 742 Cancer, 2015. **15**: p. 556.  
29  
30  
31 743 53. van der Veen, A., et al., *Laparoscopic Versus Open Gastrectomy for Gastric*  
32  
33 744 *Cancer (LOGICA): A Multicenter Randomized Clinical Trial*. J Clin Oncol, 2021.  
34  
35 745 **39**(9): p. 978-989.  
36  
37  
38 746 54. van der Wielen, N., et al., *Open versus minimally invasive total gastrectomy*  
39  
40 747 *after neoadjuvant chemotherapy: results of a European randomized trial*. Gastric  
41  
42 748 Cancer, 2021. **24**(1): p. 258-271.  
43  
44  
45 749 55. van der Wielen, N., et al., *Health related quality of life following open versus*  
46  
47 750 *minimally invasive total gastrectomy for cancer: Results from a randomized clinical*  
48  
49 751 *trial*. Eur J Surg Oncol, 2021.  
50  
51 752 56. Wang, G., et al., *Assessing the safety and efficacy of full robotic gastrectomy*  
52  
53 753 *with intracorporeal robot-sewn anastomosis for gastric cancer: A randomized clinical*  
54  
55 754 *trial*. J Surg Oncol, 2016. **113**(4): p. 397-404.  
56  
57  
58  
59  
60

- 1  
2  
3 755 57. Ojima, T., et al., *Robotic versus laparoscopic gastrectomy with lymph node*  
4  
5 756 *dissection for gastric cancer: study protocol for a randomized controlled trial*. *Trials*,  
6  
7 757 2018. **19**(1): p. 409.  
8  
9  
10 758 58. Memon, M.A. and B. Memon, *Laparoscopic D2 distal gastrectomy for*  
11  
12 759 *advanced gastric cancer: a myth or a reality?* *Transl Gastroenterol Hepatol*, 2016. **1**:  
13  
14 760 p. 39.  
15  
16  
17 761 59. Association, W.M., *World Medical Association Declaration of Helsinki: Ethical*  
18  
19 762 *Principles for Medical Research Involving Human Subjects*. *JAMA*, 2013. **310**(20): p.  
20  
21 763 2191-2194.  
22  
23  
24 764 60. Chan, A.-W., et al., *SPIRIT 2013: new guidance for content of clinical trial*  
25  
26 765 *protocols*. *The Lancet*, 2013. **381**(9861): p. 91-92.  
27  
28 766  
29  
30 767  
31  
32

33 768 **Figure 1 | Trial design flow chart.** \* Intraoperative conversion from MIG to OG, e.g.,  
34  
35 769 due to bleeding. \*\* Lost to follow-up over 30 postoperative days. Postoperative day  
36  
37 770 (POD), postoperative month (POM), intention-to-treat (ITT), per-protocol (PP).  
38  
39

40 771  
41  
42 772 **Figure 2 | Schematic lymphadenectomy.** Stations for lymphadenectomy (LAD) as  
43  
44 773 required for total gastrectomy according to the cited Japanese classification. Schemes  
45  
46 774 are separated into D1 LAD, D2 LAD, and further lymph node stations.  
47  
48

49 775

50 776  
51  
52  
53  
54  
55  
56  
57  
58  
59  
60



Figure 1 | Trial design flow chart. \* Intraoperative conversion from MIG to OG, e.g., due to bleeding. \*\* Lost to follow-up over 30 postoperative days. Postoperative day (POD), postoperative month (POM), intention-to-treat (ITT), per-protocol (PP).

200x129mm (300 x 300 DPI)

1  
2  
3  
4  
5  
6  
7  
8  
9  
10  
11  
12  
13  
14  
15  
16  
17  
18  
19  
20  
21  
22  
23  
24  
25  
26  
27  
28  
29  
30  
31  
32  
33  
34  
35  
36  
37  
38  
39  
40  
41  
42  
43  
44  
45  
46  
47  
48  
49  
50  
51  
52  
53  
54  
55  
56  
57  
58  
59  
60

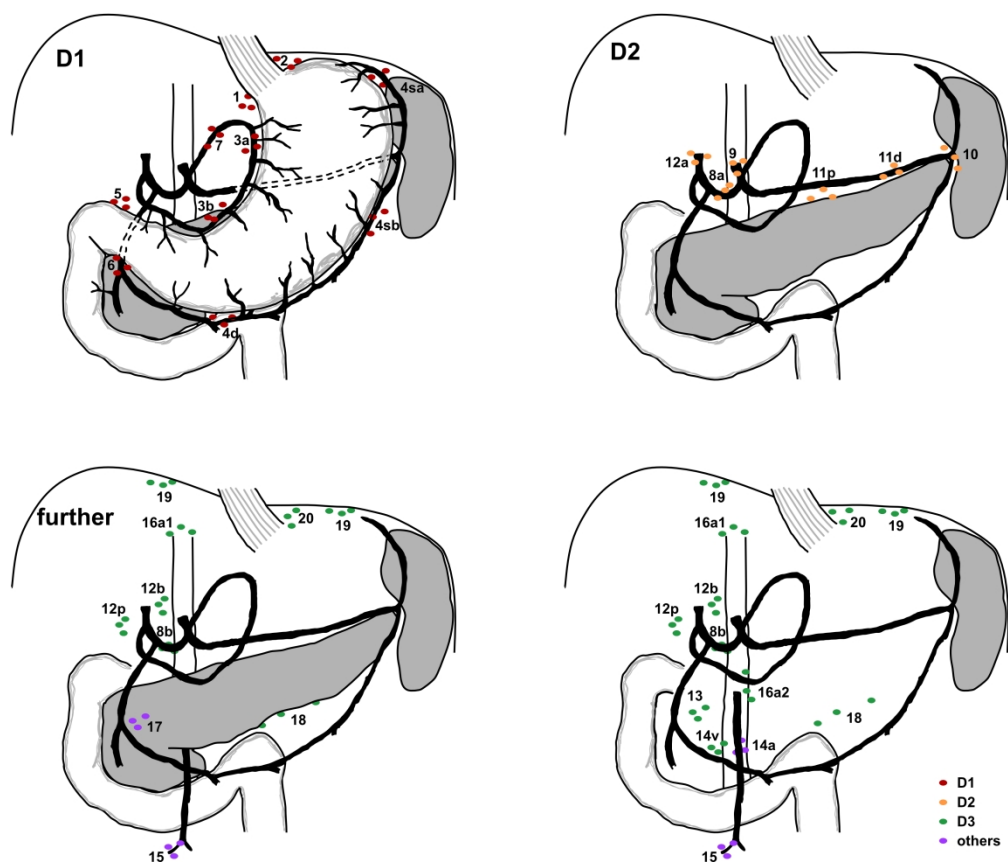

Figure 2 | Schematic lymphadenectomy. Stations for lymphadenectomy (LAD) as required for total gastrectomy according to the cited Japanese classification. Schemes are separated into D1 LAD, D2 LAD, and further lymph node stations.

295x250mm (300 x 300 DPI)

## 1 Appendices

### 2 Appendix 1: ECOG & KARNOFSKY Performance Status

| ECOG PERFORMANCE STATUS [1] [2] |                                                                                                                                                           | KARNOFSKY PERFORMANCE STATUS [3] |                                                                               |
|---------------------------------|-----------------------------------------------------------------------------------------------------------------------------------------------------------|----------------------------------|-------------------------------------------------------------------------------|
| GRADE                           | Description                                                                                                                                               | GRADE                            | Description                                                                   |
| 0                               | Fully active, able to carry on all pre-disease performance without restriction                                                                            | 100                              | Normal, no complaints; no evidence of disease                                 |
|                                 |                                                                                                                                                           | 90                               | Able to carry on normal activity; minor signs or symptoms of disease          |
| 1                               | Restricted in physically strenuous activity but ambulatory and able to carry out work of a light or sedentary nature, e.g., light house work, office work | 80                               | Normal activity with effort, some signs or symptoms of disease                |
|                                 |                                                                                                                                                           | 70                               | Cares for self but unable to carry on normal activity or to do active work    |
| 2                               | Ambulatory and capable of all selfcare but unable to carry out any work activities; up and about more than 50% of waking hours                            | 60                               | Requires occasional assistance but is able to care for most of personal needs |
|                                 |                                                                                                                                                           | 50                               | Requires considerable assistance and frequent medical care                    |
| 3                               | Capable of only limited selfcare; confined to bed or chair more than 50% of waking hours                                                                  | 40                               | Disabled; requires special care and assistance                                |
|                                 |                                                                                                                                                           | 30                               | Severely disabled; hospitalization is indicated although death not imminent   |
| 4                               | Completely disabled; cannot carry on any selfcare; totally confined to bed or chair                                                                       | 20                               | Very ill; hospitalization and active supportive care necessary                |
|                                 |                                                                                                                                                           | 10                               | Moribund                                                                      |
| 5                               | Dead                                                                                                                                                      | 0                                | Dead                                                                          |

## Appendix 2: Documentation of lymphadenectomy during total gastrectomy [4]

| No.   | Location                                             |                                                                                                                                                                                                                                        | D2 Lymphadenectomy completed lymphadenectomy = <input type="checkbox"/> |
|-------|------------------------------------------------------|----------------------------------------------------------------------------------------------------------------------------------------------------------------------------------------------------------------------------------------|-------------------------------------------------------------------------|
| 1*    | Right paracardial                                    | Right paracardial LNs, including those along the first branch of the ascending limb of the left gastric artery.                                                                                                                        | <input type="checkbox"/>                                                |
| 2*    | Left paracardial                                     | Left paracardial LNs including those along the esophagocardiac branch of the left subphrenic artery                                                                                                                                    | <input type="checkbox"/>                                                |
| 3a*   | Left gastric vessel                                  | Lesser curvature LNs along the branches of the left gastric artery                                                                                                                                                                     | <input type="checkbox"/>                                                |
| 3b*   | Right gastric vessel                                 | Lesser curvature LNs along the 2nd branch and distal part of the right gastric artery                                                                                                                                                  | <input type="checkbox"/>                                                |
| 4sa*  | Short gastric vessel                                 | Left greater curvature LNs along the short gastric arteries (perigastric area)                                                                                                                                                         | <input type="checkbox"/>                                                |
| 4sb*  | Left gastroepiploic                                  | Left greater curvature LNs along the left gastroepiploic artery (perigastric area)                                                                                                                                                     | <input type="checkbox"/>                                                |
| 4d*   | Right gastroepiploic                                 | Right greater curvature LNs along the 2nd branch and distal part of the right gastroepiploic artery                                                                                                                                    | <input type="checkbox"/>                                                |
| 5*    | Suprapyloric                                         | Suprapyloric LNs along the 1st branch and proximal part of the right gastric artery                                                                                                                                                    | <input type="checkbox"/>                                                |
| 6*    | Infrapyloric                                         | Infrapyloric LNs along the first branch and proximal part of the right gastroepiploic artery down to the confluence of the right gastroepiploic vein and the anterior superior pancreaticoduodenal vein                                | <input type="checkbox"/>                                                |
| 7*    | Left gastric artery                                  | LNs along the trunk of left gastric artery between its root and the origin of its ascending branch                                                                                                                                     | <input type="checkbox"/>                                                |
| 8a**  | Common hepatic artery                                | Anterosuperior LNs along the common hepatic artery                                                                                                                                                                                     | <input type="checkbox"/>                                                |
| 8b    | Common hepatic artery                                | Posterior LNs along the common hepatic artery                                                                                                                                                                                          | <input type="checkbox"/>                                                |
| 9**   | Celiac artery                                        | Celiac artery LNs                                                                                                                                                                                                                      | <input type="checkbox"/>                                                |
| 10**  | Splenic hilum                                        | Splenic hilar LNs including those adjacent to the splenic artery distal to the pancreatic tail, and those on the roots of the short gastric arteries and those along the left gastroepiploic artery proximal to its 1st gastric branch | <input type="checkbox"/>                                                |
| 11p** | Proximal splenic artery                              | Proximal splenic artery LNs from its origin to halfway between its origin and the pancreatic tail end                                                                                                                                  | <input type="checkbox"/>                                                |
| 11d** | Distal splenic artery                                | Distal splenic artery LNs from halfway between its origin and the pancreatic tail end to the end of the pancreatic tail                                                                                                                | <input type="checkbox"/>                                                |
| 12a** | Hepatoduodenal ligament along the hepatic artery     | Hepatoduodenal ligament LNs along the proper hepatic artery, in the caudal half between the confluence of the right and left hepatic ducts and the upper border of the pancreas                                                        | <input type="checkbox"/>                                                |
| 12b   | Hepatoduodenal ligament along the bile duct          | Hepatoduodenal ligament LNs along the bile duct, in the caudal half between the confluence of the right and left hepatic ducts and the upper border of the pancreas                                                                    | <input type="checkbox"/>                                                |
| 12p   | Hepatoduodenal ligament along behind the portal vein | Hepatoduodenal ligament LNs along the portal vein in the caudal half between the confluence of the right and left hepatic ducts and the upper border of the pancreas                                                                   | <input type="checkbox"/>                                                |
| 13    | Posterior surface of pancreatic head                 | LNs on the posterior surface of the pancreatic head cranial to the duodenal papilla                                                                                                                                                    | <input type="checkbox"/>                                                |
| 14v   | Superior mesenteric vein                             | LNs along the superior mesenteric vein                                                                                                                                                                                                 | <input type="checkbox"/>                                                |
| 14a   | Superior mesenteric artery                           | -                                                                                                                                                                                                                                      | <input type="checkbox"/>                                                |
| 15    | Middle colic vessels                                 | LNs along the middle colic vessels                                                                                                                                                                                                     | <input type="checkbox"/>                                                |
| 16a1  | Aortic hiatus                                        | Paraaortic LNs in the diaphragmatic aortic hiatus                                                                                                                                                                                      | <input type="checkbox"/>                                                |
| 16a2  | Abdominal aorta (celiac trunk to left renal vein)    | Paraaortic LNs between the upper margin of the origin of the celiac artery and the lower border of the left renal vein                                                                                                                 | <input type="checkbox"/>                                                |
| 16b1  | Abdominal aorta (left renal vein to IMA)             | Paraaortic LNs between the lower border of the left renal vein and the upper border of the origin of the inferior mesenteric artery                                                                                                    | <input type="checkbox"/>                                                |
| 16b2  | Abdominal aorta (IMA to aortic bifurcation)          | Paraaortic LNs between the upper border of the origin of the inferior mesenteric artery and the aortic bifurcation                                                                                                                     | <input type="checkbox"/>                                                |
| 17    | Anterior surface of pancreatic head                  | LNs on the anterior surface of the pancreatic head beneath the pancreatic sheath                                                                                                                                                       | <input type="checkbox"/>                                                |
| 18    | Inferior margin of pancreas                          | LNs along the inferior border of the pancreatic body                                                                                                                                                                                   | <input type="checkbox"/>                                                |
| 19    | Infradiaphragmatic                                   | Infradiaphragmatic LNs predominantly along the subphrenic artery                                                                                                                                                                       | <input type="checkbox"/>                                                |
| 20    | Esophageal hiatus of the diaphragm                   | Paraesophageal LNs in the diaphragmatic esophageal hiatus                                                                                                                                                                              | <input type="checkbox"/>                                                |
| 110   | Paraesophageal lower thorax                          | Paraesophageal LNs in the lower thorax                                                                                                                                                                                                 | <input type="checkbox"/>                                                |
| 111   | Supradiaphragmatic                                   | Supradiaphragmatic LNs separate from the esophagus                                                                                                                                                                                     | <input type="checkbox"/>                                                |
| 112   | Posterior mediastinal                                | Posterior mediastinal LNs separate from the esophagus and the esophageal hiatus                                                                                                                                                        | <input type="checkbox"/>                                                |

\*required for D1 lymphadenectomy

\*\*required for D2 lymphadenectomy

|                          |                                             |
|--------------------------|---------------------------------------------|
| <input type="checkbox"/> | Not required for MEGA trial                 |
| <input type="checkbox"/> | Optional for MEGA trial                     |
| <input type="checkbox"/> | Required for MEGA trial; if not explain why |

### Appendix 3: Clavien-Dindo-Classification [5]

| Grades     | Definition                                                                                                                                                                                                                                                                                                                                                   |
|------------|--------------------------------------------------------------------------------------------------------------------------------------------------------------------------------------------------------------------------------------------------------------------------------------------------------------------------------------------------------------|
| <b>I</b>   | Any deviation from the normal postoperative course without the need for pharmacological treatment or surgical, endoscopic and radiological interventions<br>Allowed therapeutic regimens are: drugs as antiemetics, antipyretics, analgetics, diuretics and electrolytes and physiotherapy. This grade also includes wound infections opened at the bedside. |
| <b>II</b>  | Requiring pharmacological treatment with drugs other than such allowed for grade I complications.<br>Blood transfusions and total parenteral nutrition are also included.                                                                                                                                                                                    |
| <b>III</b> | Requiring surgical, endoscopic or radiological intervention                                                                                                                                                                                                                                                                                                  |
|            | <b>IIIa</b> Intervention not under general anesthesia                                                                                                                                                                                                                                                                                                        |
|            | <b>IIIb</b> Intervention under general anesthesia                                                                                                                                                                                                                                                                                                            |
| <b>IV</b>  | Life-threatening complication (including CNS complications)* requiring IC/ICU-management                                                                                                                                                                                                                                                                     |
|            | <b>IVa</b> single organ dysfunction (including dialysis)                                                                                                                                                                                                                                                                                                     |
|            | <b>IVb</b> multiorgan dysfunction                                                                                                                                                                                                                                                                                                                            |
| <b>V</b>   | Death of a patient                                                                                                                                                                                                                                                                                                                                           |

\*brain hemorrhage, ischemic stroke, subarachnoidal bleeding, but excluding transient ischemic attacks (TIA); IC: Intermediate care; ICU: Intensive care unit.

### Appendix 4: Katz Activities of Daily Living

| Activities<br>Points (1 or 0) | <b>Independence<br/>(1 Point)</b><br>NO supervision, direction or personal assistance.                                               | <b>Dependence<br/>(0 Points)</b><br>WITH supervision, direction, personal assistance or total care.                    |
|-------------------------------|--------------------------------------------------------------------------------------------------------------------------------------|------------------------------------------------------------------------------------------------------------------------|
| BATHING<br>Points: _____      | Bathes self completely or needs help in bathing only a single part of the body such as the back, genital area or disabled extremity. | Need help with bathing more than one part of the body, getting in or out of the tub or shower. Requires total bathing. |
| DRESSING<br>Points: _____     | Get clothes from closets and drawers and puts on clothes and outer garments complete with fasteners. May have help tying shoes.      | Needs help with dressing self or needs to be completely dressed.                                                       |
| TOILETING<br>Points: _____    | Goes to toilet, gets on and off, arranges clothes, cleans genital area without help.                                                 | Needs help transferring to the toilet, cleaning self or uses bedpan or commode.                                        |
| TRANSFERRING<br>Points: _____ | Moves in and out of bed or chair unassisted. Mechanical transfer aids are acceptable                                                 | Needs help in moving from bed to chair or requires a complete transfer.                                                |
| CONTINENCE<br>Points: _____   | Exercises complete self control over urination and defecation.                                                                       | Is partially or totally incontinent of bowel or bladder.                                                               |
| FEEDING<br>Points: _____      | Gets food from plate into mouth without help. Preparation of food may be done by another person.                                     | Needs partial or total help with feeding or requires parenteral feeding.                                               |

## Appendix References

1. Zubrod, C.G., et al., *Appraisal of methods for the study of chemotherapy of cancer in man: Comparative therapeutic trial of nitrogen mustard and triethylene thiophosphoramide*. Journal of Chronic Diseases, 1960. **11**(1): p. 7-33.
2. Oken, M.M., et al., *Toxicity and response criteria of the Eastern Cooperative Oncology Group*. Am J Clin Oncol, 1982. **5**(6): p. 649-55.
3. Karnofsky, D.A., *The clinical evaluation of chemotherapeutic agents in cancer*. Evaluation of chemotherapeutic agents, 1949: p. 191-205.
4. Japanese Gastric Cancer, A., *Japanese classification of gastric carcinoma: 3rd English edition*. Gastric Cancer, 2011. **14**(2): p. 101-112.
5. Dindo, D., N. Demartines, and P.-A. Clavien, *Classification of surgical complications: a new proposal with evaluation in a cohort of 6336 patients and results of a survey*. Annals of surgery, 2004. **240**(2): p. 205-213.



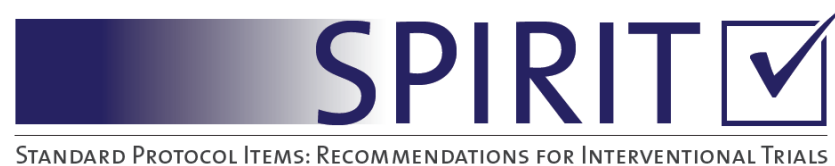

SPIRIT 2013 Checklist: Recommended items to address in a clinical trial protocol and related documents\*

| Section/item                      | Item No | Description                                                                                                                                                                                                                                                                              | Addressed on page number |
|-----------------------------------|---------|------------------------------------------------------------------------------------------------------------------------------------------------------------------------------------------------------------------------------------------------------------------------------------------|--------------------------|
| <b>Administrative information</b> |         |                                                                                                                                                                                                                                                                                          |                          |
| Title                             | 1       | Descriptive title identifying the study design, population, interventions, and, if applicable, trial acronym                                                                                                                                                                             | 1                        |
| Trial registration                | 2a      | Trial identifier and registry name. If not yet registered, name of intended registry                                                                                                                                                                                                     | 3                        |
|                                   | 2b      | All items from the World Health Organization Trial Registration Data Set                                                                                                                                                                                                                 | across whole protocol    |
| Protocol version                  | 3       | Date and version identifier                                                                                                                                                                                                                                                              | 21                       |
| Funding                           | 4       | Sources and types of financial, material, and other support                                                                                                                                                                                                                              | 23                       |
| Roles and responsibilities        | 5a      | Names, affiliations, and roles of protocol contributors                                                                                                                                                                                                                                  | 1 and 24                 |
|                                   | 5b      | Name and contact information for the trial sponsor                                                                                                                                                                                                                                       | 2                        |
|                                   | 5c      | Role of study sponsor and funders, if any, in study design; collection, management, analysis, and interpretation of data; writing of the report; and the decision to submit the report for publication, including whether they will have ultimate authority over any of these activities | 24                       |
|                                   | 5d      | Composition, roles, and responsibilities of the coordinating centre, steering committee, endpoint adjudication committee, data management team, and other individuals or groups overseeing the trial, if applicable (see Item 21a for data monitoring committee)                         | 24                       |

|    |                                                           |     |                                                                                                               |           |
|----|-----------------------------------------------------------|-----|---------------------------------------------------------------------------------------------------------------|-----------|
| 1  | <b>Introduction</b>                                       |     |                                                                                                               |           |
| 2  |                                                           |     |                                                                                                               |           |
| 3  | Background and                                            | 6a  | Description of research question and justification for undertaking the trial, including summary of relevant   |           |
| 4  | rationale                                                 |     | studies (published and unpublished) examining benefits and harms for each intervention                        | 5         |
| 5  |                                                           |     |                                                                                                               |           |
| 6  |                                                           | 6b  | Explanation for choice of comparators                                                                         | 5         |
| 7  |                                                           |     |                                                                                                               |           |
| 8  | Objectives                                                | 7   | Specific objectives or hypotheses                                                                             | 5, 11, 19 |
| 9  |                                                           |     |                                                                                                               |           |
| 10 | Trial design                                              | 8   | Description of trial design including type of trial (eg, parallel group, crossover, factorial, single group), |           |
| 11 |                                                           |     | allocation ratio, and framework (eg, superiority, equivalence, noninferiority, exploratory)                   | 6         |
| 12 |                                                           |     |                                                                                                               |           |
| 13 |                                                           |     |                                                                                                               |           |
| 14 | <b>Methods: Participants, interventions, and outcomes</b> |     |                                                                                                               |           |
| 15 |                                                           |     |                                                                                                               |           |
| 16 | Study setting                                             | 9   | Description of study settings (eg, community clinic, academic hospital) and list of countries where data      |           |
| 17 |                                                           |     | will be collected. Reference to where list of study sites can be obtained                                     | 6         |
| 18 |                                                           |     |                                                                                                               |           |
| 19 | Eligibility criteria                                      | 10  | Inclusion and exclusion criteria for participants. If applicable, eligibility criteria for study centres and  |           |
| 20 |                                                           |     | individuals who will perform the interventions (eg, surgeons, psychotherapists)                               | 7         |
| 21 |                                                           |     |                                                                                                               |           |
| 22 | Interventions                                             | 11a | Interventions for each group with sufficient detail to allow replication, including how and when they will be |           |
| 23 |                                                           |     | administered                                                                                                  | 11 - 12   |
| 24 |                                                           |     |                                                                                                               |           |
| 25 |                                                           | 11b | Criteria for discontinuing or modifying allocated interventions for a given trial participant (eg, drug dose  |           |
| 26 |                                                           |     | change in response to harms, participant request, or improving/worsening disease)                             | 15        |
| 27 |                                                           |     |                                                                                                               |           |
| 28 |                                                           | 11c | Strategies to improve adherence to intervention protocols, and any procedures for monitoring adherence        |           |
| 29 |                                                           |     | (eg, drug tablet return, laboratory tests)                                                                    | 4, 16     |
| 30 |                                                           |     |                                                                                                               |           |
| 31 |                                                           | 11d | Relevant concomitant care and interventions that are permitted or prohibited during the trial                 |           |
| 32 |                                                           |     |                                                                                                               | 11 - 12   |
| 33 |                                                           |     |                                                                                                               |           |
| 34 | Outcomes                                                  | 12  | Primary, secondary, and other outcomes, including the specific measurement variable (eg, systolic blood       |           |
| 35 |                                                           |     | pressure), analysis metric (eg, change from baseline, final value, time to event), method of aggregation      |           |
| 36 |                                                           |     | (eg, median, proportion), and time point for each outcome. Explanation of the clinical relevance of chosen    |           |
| 37 |                                                           |     | efficacy and harm outcomes is strongly recommended                                                            | 11        |
| 38 |                                                           |     |                                                                                                               |           |
| 39 |                                                           |     |                                                                                                               |           |
| 40 | Participant                                               | 13  | Time schedule of enrolment, interventions (including any run-ins and washouts), assessments, and visits       |           |
| 41 | timeline                                                  |     | for participants. A schematic diagram is highly recommended (see Figure)                                      | Figure 1  |
| 42 |                                                           |     |                                                                                                               |           |

|   |             |    |                                                                                                                                                                                       |    |
|---|-------------|----|---------------------------------------------------------------------------------------------------------------------------------------------------------------------------------------|----|
| 1 | Sample size | 14 | Estimated number of participants needed to achieve study objectives and how it was determined, including clinical and statistical assumptions supporting any sample size calculations | 16 |
| 2 |             |    |                                                                                                                                                                                       |    |
| 3 |             |    |                                                                                                                                                                                       |    |
| 4 | Recruitment | 15 | Strategies for achieving adequate participant enrolment to reach target sample size                                                                                                   | 16 |
| 5 |             |    |                                                                                                                                                                                       |    |

## 7 **Methods: Assignment of interventions (for controlled trials)**

### 8 Allocation:

|    |                |     |                                                                                                                                                                                                                                                                                                                                                          |       |
|----|----------------|-----|----------------------------------------------------------------------------------------------------------------------------------------------------------------------------------------------------------------------------------------------------------------------------------------------------------------------------------------------------------|-------|
| 10 | Sequence       | 16a | Method of generating the allocation sequence (eg, computer-generated random numbers), and list of any factors for stratification. To reduce predictability of a random sequence, details of any planned restriction (eg, blocking) should be provided in a separate document that is unavailable to those who enrol participants or assign interventions | 13    |
| 11 | generation     |     |                                                                                                                                                                                                                                                                                                                                                          |       |
| 12 |                |     |                                                                                                                                                                                                                                                                                                                                                          |       |
| 13 |                |     |                                                                                                                                                                                                                                                                                                                                                          |       |
| 14 |                |     |                                                                                                                                                                                                                                                                                                                                                          |       |
| 15 |                |     |                                                                                                                                                                                                                                                                                                                                                          |       |
| 16 | Allocation     | 16b | Mechanism of implementing the allocation sequence (eg, central telephone; sequentially numbered, opaque, sealed envelopes), describing any steps to conceal the sequence until interventions are assigned                                                                                                                                                | 13    |
| 17 | concealment    |     |                                                                                                                                                                                                                                                                                                                                                          |       |
| 18 | mechanism      |     |                                                                                                                                                                                                                                                                                                                                                          |       |
| 19 |                |     |                                                                                                                                                                                                                                                                                                                                                          |       |
| 20 |                |     |                                                                                                                                                                                                                                                                                                                                                          |       |
| 21 | Implementation | 16c | Who will generate the allocation sequence, who will enrol participants, and who will assign participants to interventions                                                                                                                                                                                                                                | 13    |
| 22 |                |     |                                                                                                                                                                                                                                                                                                                                                          |       |
| 23 |                |     |                                                                                                                                                                                                                                                                                                                                                          |       |
| 24 | Blinding       | 17a | Who will be blinded after assignment to interventions (eg, trial participants, care providers, outcome assessors, data analysts), and how                                                                                                                                                                                                                | 13    |
| 25 | (masking)      |     |                                                                                                                                                                                                                                                                                                                                                          |       |
| 26 |                |     |                                                                                                                                                                                                                                                                                                                                                          |       |
| 27 |                | 17b | If blinded, circumstances under which unblinding is permissible, and procedure for revealing a participant's allocated intervention during the trial                                                                                                                                                                                                     | 6, 13 |
| 28 |                |     |                                                                                                                                                                                                                                                                                                                                                          |       |
| 29 |                |     |                                                                                                                                                                                                                                                                                                                                                          |       |
| 30 |                |     |                                                                                                                                                                                                                                                                                                                                                          |       |

## 31 **Methods: Data collection, management, and analysis**

|    |                 |     |                                                                                                                                                                                                                                                                                                                                                                                                              |    |
|----|-----------------|-----|--------------------------------------------------------------------------------------------------------------------------------------------------------------------------------------------------------------------------------------------------------------------------------------------------------------------------------------------------------------------------------------------------------------|----|
| 33 | Data collection | 18a | Plans for assessment and collection of outcome, baseline, and other trial data, including any related processes to promote data quality (eg, duplicate measurements, training of assessors) and a description of study instruments (eg, questionnaires, laboratory tests) along with their reliability and validity, if known. Reference to where data collection forms can be found, if not in the protocol | 17 |
| 34 | methods         |     |                                                                                                                                                                                                                                                                                                                                                                                                              |    |
| 35 |                 |     |                                                                                                                                                                                                                                                                                                                                                                                                              |    |
| 36 |                 |     |                                                                                                                                                                                                                                                                                                                                                                                                              |    |
| 37 |                 |     |                                                                                                                                                                                                                                                                                                                                                                                                              |    |
| 38 |                 |     |                                                                                                                                                                                                                                                                                                                                                                                                              |    |
| 39 |                 | 18b | Plans to promote participant retention and complete follow-up, including list of any outcome data to be collected for participants who discontinue or deviate from intervention protocols                                                                                                                                                                                                                    | 17 |
| 40 |                 |     |                                                                                                                                                                                                                                                                                                                                                                                                              |    |
| 41 |                 |     |                                                                                                                                                                                                                                                                                                                                                                                                              |    |
| 42 |                 |     |                                                                                                                                                                                                                                                                                                                                                                                                              |    |

|    |                                 |     |                                                                                                               |         |
|----|---------------------------------|-----|---------------------------------------------------------------------------------------------------------------|---------|
| 1  | Data                            | 19  | Plans for data entry, coding, security, and storage, including any related processes to promote data          |         |
| 2  | management                      |     | quality (eg, double data entry; range checks for data values). Reference to where details of data             | 16 - 17 |
| 3  |                                 |     | management procedures can be found, if not in the protocol                                                    |         |
| 4  |                                 |     |                                                                                                               |         |
| 5  | Statistical                     | 20a | Statistical methods for analysing primary and secondary outcomes. Reference to where other details of         |         |
| 6  | methods                         |     | the statistical analysis plan can be found, if not in the protocol                                            | 16 - 17 |
| 7  |                                 |     |                                                                                                               |         |
| 8  |                                 | 20b | Methods for any additional analyses (eg, subgroup and adjusted analyses)                                      | 17      |
| 9  |                                 |     |                                                                                                               |         |
| 10 |                                 | 20c | Definition of analysis population relating to protocol non-adherence (eg, as randomised analysis), and        |         |
| 11 |                                 |     | any statistical methods to handle missing data (eg, multiple imputation)                                      | 17      |
| 12 |                                 |     |                                                                                                               |         |
| 13 |                                 |     |                                                                                                               |         |
| 14 | <b>Methods: Monitoring</b>      |     |                                                                                                               |         |
| 15 |                                 |     |                                                                                                               |         |
| 16 | Data monitoring                 | 21a | Composition of data monitoring committee (DMC); summary of its role and reporting structure; statement        |         |
| 17 |                                 |     | of whether it is independent from the sponsor and competing interests; and reference to where further         |         |
| 18 |                                 |     | details about its charter can be found, if not in the protocol. Alternatively, an explanation of why a DMC is | 24 - 25 |
| 19 |                                 |     | not needed                                                                                                    |         |
| 20 |                                 |     |                                                                                                               |         |
| 21 |                                 |     |                                                                                                               |         |
| 22 |                                 | 21b | Description of any interim analyses and stopping guidelines, including who will have access to these          |         |
| 23 |                                 |     | interim results and make the final decision to terminate the trial                                            | 16, 17  |
| 24 |                                 |     |                                                                                                               |         |
| 25 | Harms                           | 22  | Plans for collecting, assessing, reporting, and managing solicited and spontaneously reported adverse         |         |
| 26 |                                 |     | events and other unintended effects of trial interventions or trial conduct                                   | 14 - 15 |
| 27 |                                 |     |                                                                                                               |         |
| 28 | Auditing                        | 23  | Frequency and procedures for auditing trial conduct, if any, and whether the process will be independent      |         |
| 29 |                                 |     | from investigators and the sponsor                                                                            | 24 - 25 |
| 30 |                                 |     |                                                                                                               |         |
| 31 |                                 |     |                                                                                                               |         |
| 32 | <b>Ethics and dissemination</b> |     |                                                                                                               |         |
| 33 |                                 |     |                                                                                                               |         |
| 34 | Research ethics                 | 24  | Plans for seeking research ethics committee/institutional review board (REC/IRB) approval                     |         |
| 35 | approval                        |     |                                                                                                               | 20      |
| 36 |                                 |     |                                                                                                               |         |
| 37 | Protocol                        | 25  | Plans for communicating important protocol modifications (eg, changes to eligibility criteria, outcomes,      |         |
| 38 | amendments                      |     | analyses) to relevant parties (eg, investigators, REC/IRBs, trial participants, trial registries, journals,   |         |
| 39 |                                 |     | regulators)                                                                                                   | 21 - 22 |
| 40 |                                 |     |                                                                                                               |         |
| 41 |                                 |     |                                                                                                               |         |
| 42 |                                 |     |                                                                                                               |         |
| 43 |                                 |     |                                                                                                               |         |
| 44 |                                 |     |                                                                                                               |         |
| 45 |                                 |     |                                                                                                               |         |
| 46 |                                 |     |                                                                                                               |         |

|    |                               |     |                                                                                                                                                                                                                                                                                     |          |
|----|-------------------------------|-----|-------------------------------------------------------------------------------------------------------------------------------------------------------------------------------------------------------------------------------------------------------------------------------------|----------|
| 1  | Consent or assent             | 26a | Who will obtain informed consent or assent from potential trial participants or authorised surrogates, and how (see Item 32)                                                                                                                                                        | 8 - 9    |
| 2  |                               |     |                                                                                                                                                                                                                                                                                     |          |
| 3  |                               |     |                                                                                                                                                                                                                                                                                     |          |
| 4  |                               | 26b | Additional consent provisions for collection and use of participant data and biological specimens in ancillary studies, if applicable                                                                                                                                               | 8 - 9    |
| 5  |                               |     |                                                                                                                                                                                                                                                                                     |          |
| 6  |                               |     |                                                                                                                                                                                                                                                                                     |          |
| 7  | Confidentiality               | 27  | How personal information about potential and enrolled participants will be collected, shared, and maintained in order to protect confidentiality before, during, and after the trial                                                                                                | 8 - 9    |
| 8  |                               |     |                                                                                                                                                                                                                                                                                     |          |
| 9  |                               |     |                                                                                                                                                                                                                                                                                     |          |
| 10 | Declaration of interests      | 28  | Financial and other competing interests for principal investigators for the overall trial and each study site                                                                                                                                                                       | 23 - 25  |
| 11 |                               |     |                                                                                                                                                                                                                                                                                     |          |
| 12 |                               |     |                                                                                                                                                                                                                                                                                     |          |
| 13 | Access to data                | 29  | Statement of who will have access to the final trial dataset, and disclosure of contractual agreements that limit such access for investigators                                                                                                                                     | 16 - 17  |
| 14 |                               |     |                                                                                                                                                                                                                                                                                     |          |
| 15 |                               |     |                                                                                                                                                                                                                                                                                     |          |
| 16 | Ancillary and post-trial care | 30  | Provisions, if any, for ancillary and post-trial care, and for compensation to those who suffer harm from trial participation                                                                                                                                                       | NA       |
| 17 |                               |     |                                                                                                                                                                                                                                                                                     |          |
| 18 |                               |     |                                                                                                                                                                                                                                                                                     |          |
| 19 |                               |     |                                                                                                                                                                                                                                                                                     |          |
| 20 | Dissemination policy          | 31a | Plans for investigators and sponsor to communicate trial results to participants, healthcare professionals, the public, and other relevant groups (eg, via publication, reporting in results databases, or other data sharing arrangements), including any publication restrictions | 21       |
| 21 |                               |     |                                                                                                                                                                                                                                                                                     |          |
| 22 |                               |     |                                                                                                                                                                                                                                                                                     |          |
| 23 |                               |     |                                                                                                                                                                                                                                                                                     |          |
| 24 |                               | 31b | Authorship eligibility guidelines and any intended use of professional writers                                                                                                                                                                                                      | 24       |
| 25 |                               |     |                                                                                                                                                                                                                                                                                     |          |
| 26 |                               | 31c | Plans, if any, for granting public access to the full protocol, participant-level dataset, and statistical code                                                                                                                                                                     | 25       |
| 27 |                               |     |                                                                                                                                                                                                                                                                                     |          |
| 28 |                               |     |                                                                                                                                                                                                                                                                                     |          |
| 29 | <b>Appendices</b>             |     |                                                                                                                                                                                                                                                                                     |          |
| 30 |                               |     |                                                                                                                                                                                                                                                                                     |          |
| 31 | Informed consent materials    | 32  | Model consent form and other related documentation given to participants and authorised surrogates                                                                                                                                                                                  | attached |
| 32 |                               |     |                                                                                                                                                                                                                                                                                     |          |
| 33 |                               |     |                                                                                                                                                                                                                                                                                     |          |
| 34 | Biological specimens          | 33  | Plans for collection, laboratory evaluation, and storage of biological specimens for genetic or molecular analysis in the current trial and for future use in ancillary studies, if applicable                                                                                      | Table 1  |
| 35 |                               |     |                                                                                                                                                                                                                                                                                     |          |
| 36 |                               |     |                                                                                                                                                                                                                                                                                     |          |

\*It is strongly recommended that this checklist be read in conjunction with the SPIRIT 2013 Explanation & Elaboration for important clarification on the items. Amendments to the protocol should be tracked and dated. The SPIRIT checklist is copyrighted by the SPIRIT Group under the Creative Commons [“Attribution-NonCommercial-NoDerivs 3.0 Unported”](https://creativecommons.org/licenses/by-nc-nd/3.0/) license.
