# Supplementary material for: Minimally invasivE versus open total GAstrectomy (MEGA): study protocol for a multicentre randomised controlled trial (DRKS00025765)
Source: PubMed Central journal article supplement — BMJ Open. 2022 Oct 31;12(10):e064286. doi: 10.1136/bmjopen-2022-064286 (PMC9628650; doi:10.1136/bmjopen-2022-064286), 2022-10-31
Supplement: bmjopen-2022-064286supp001.pdf [file bmjopen-2022-064286supp001.pdf]

1 **Appendices**

2

3 **Appendix 1: ECOG & KARNOFSKY Performance Status**

4

| ECOG PERFORMANCE STATUS [1] [2] |                                                                                                                                                           | KARNOFSKY PERFORMANCE STATUS [3] |                                                                               |
|---------------------------------|-----------------------------------------------------------------------------------------------------------------------------------------------------------|----------------------------------|-------------------------------------------------------------------------------|
| GRADE                           | Description                                                                                                                                               | GRADE                            | Description                                                                   |
| 0                               | Fully active, able to carry on all pre-disease performance without restriction                                                                            | 100                              | Normal, no complaints; no evidence of disease                                 |
|                                 |                                                                                                                                                           | 90                               | Able to carry on normal activity; minor signs or symptoms of disease          |
| 1                               | Restricted in physically strenuous activity but ambulatory and able to carry out work of a light or sedentary nature, e.g., light house work, office work | 80                               | Normal activity with effort, some signs or symptoms of disease                |
|                                 |                                                                                                                                                           | 70                               | Cares for self but unable to carry on normal activity or to do active work    |
| 2                               | Ambulatory and capable of all selfcare but unable to carry out any work activities; up and about more than 50% of waking hours                            | 60                               | Requires occasional assistance but is able to care for most of personal needs |
|                                 |                                                                                                                                                           | 50                               | Requires considerable assistance and frequent medical care                    |
| 3                               | Capable of only limited selfcare; confined to bed or chair more than 50% of waking hours                                                                  | 40                               | Disabled; requires special care and assistance                                |
|                                 |                                                                                                                                                           | 30                               | Severely disabled; hospitalization is indicated although death not imminent   |
| 4                               | Completely disabled; cannot carry on any selfcare; totally confined to bed or chair                                                                       | 20                               | Very ill; hospitalization and active supportive care necessary                |
|                                 |                                                                                                                                                           | 10                               | Moribund                                                                      |
| 5                               | Dead                                                                                                                                                      | 0                                | Dead                                                                          |

5

6

7

8

9 **Appendix 2: Documentation of lymphadenectomy during total gastrectomy [4]**  
10

| No.   | Location                                             |                                                                                                                                                                                                                                        | D2 Lymphadenectomy completed lymphadenectomy = <input type="checkbox"/> |
|-------|------------------------------------------------------|----------------------------------------------------------------------------------------------------------------------------------------------------------------------------------------------------------------------------------------|-------------------------------------------------------------------------|
| 1*    | Right paracardial                                    | Right paracardial LNs, including those along the first branch of the ascending limb of the left gastric artery.                                                                                                                        | <input type="checkbox"/>                                                |
| 2*    | Left paracardial                                     | Left paracardial LNs including those along the esophagocardiac branch of the left subphrenic artery                                                                                                                                    | <input type="checkbox"/>                                                |
| 3a*   | Left gastric vessel                                  | Lesser curvature LNs along the branches of the left gastric artery                                                                                                                                                                     | <input type="checkbox"/>                                                |
| 3b*   | Right gastric vessel                                 | Lesser curvature LNs along the 2nd branch and distal part of the right gastric artery                                                                                                                                                  | <input type="checkbox"/>                                                |
| 4sa*  | Short gastric vessel                                 | Left greater curvature LNs along the short gastric arteries (perigastric area)                                                                                                                                                         | <input type="checkbox"/>                                                |
| 4sb*  | Left gastroepiploic                                  | Left greater curvature LNs along the left gastroepiploic artery (perigastric area)                                                                                                                                                     | <input type="checkbox"/>                                                |
| 4d*   | Right gastroepiploic                                 | Right greater curvature LNs along the 2nd branch and distal part of the right gastroepiploic artery                                                                                                                                    | <input type="checkbox"/>                                                |
| 5*    | Suprapyloric                                         | Suprapyloric LNs along the 1st branch and proximal part of the right gastric artery                                                                                                                                                    | <input type="checkbox"/>                                                |
| 6*    | Infrapyloric                                         | Infrapyloric LNs along the first branch and proximal part of the right gastroepiploic artery down to the confluence of the right gastroepiploic vein and the anterior superior pancreaticoduodenal vein                                | <input type="checkbox"/>                                                |
| 7*    | Left gastric artery                                  | LNs along the trunk of left gastric artery between its root and the origin of its ascending branch                                                                                                                                     | <input type="checkbox"/>                                                |
| 8a**  | Common hepatic artery                                | Anterosuperior LNs along the common hepatic artery                                                                                                                                                                                     | <input type="checkbox"/>                                                |
| 8b    | Common hepatic artery                                | Posterior LNs along the common hepatic artery                                                                                                                                                                                          | <input type="checkbox"/>                                                |
| 9**   | Celiac artery                                        | Celiac artery LNs                                                                                                                                                                                                                      | <input type="checkbox"/>                                                |
| 10**  | Splenic hilum                                        | Splenic hilar LNs including those adjacent to the splenic artery distal to the pancreatic tail, and those on the roots of the short gastric arteries and those along the left gastroepiploic artery proximal to its 1st gastric branch | <input type="checkbox"/>                                                |
| 11p** | Proximal splenic artery                              | Proximal splenic artery LNs from its origin to halfway between its origin and the pancreatic tail end                                                                                                                                  | <input type="checkbox"/>                                                |
| 11d** | Distal splenic artery                                | Distal splenic artery LNs from halfway between its origin and the pancreatic tail end to the end of the pancreatic tail                                                                                                                | <input type="checkbox"/>                                                |
| 12a** | Hepatoduodenal ligament along the hepatic artery     | Hepatoduodenal ligament LNs along the proper hepatic artery, in the caudal half between the confluence of the right and left hepatic ducts and the upper border of the pancreas                                                        | <input type="checkbox"/>                                                |
| 12b   | Hepatoduodenal ligament along the bile duct          | Hepatoduodenal ligament LNs along the bile duct, in the caudal half between the confluence of the right and left hepatic ducts and the upper border of the pancreas                                                                    | <input type="checkbox"/>                                                |
| 12p   | Hepatoduodenal ligament along behind the portal vein | Hepatoduodenal ligament LNs along the portal vein in the caudal half between the confluence of the right and left hepatic ducts and the upper border of the pancreas                                                                   | <input type="checkbox"/>                                                |
| 13    | Posterior surface of pancreatic head                 | LNs on the posterior surface of the pancreatic head cranial to the duodenal papilla                                                                                                                                                    | <input type="checkbox"/>                                                |
| 14v   | Superior mesenteric vein                             | LNs along the superior mesenteric vein                                                                                                                                                                                                 | <input type="checkbox"/>                                                |
| 14a   | Superior mesenteric artery                           | -                                                                                                                                                                                                                                      | <input type="checkbox"/>                                                |
| 15    | Middle colic vessels                                 | LNs along the middle colic vessels                                                                                                                                                                                                     | <input type="checkbox"/>                                                |
| 16a1  | Aortic hiatus                                        | Para-aortic LNs in the diaphragmatic aortic hiatus                                                                                                                                                                                     | <input type="checkbox"/>                                                |
| 16a2  | Abdominal aorta (celiac trunk to left renal vein)    | Para-aortic LNs between the upper margin of the origin of the celiac artery and the lower border of the left renal vein                                                                                                                | <input type="checkbox"/>                                                |
| 16b1  | Abdominal aorta (left renal vein to IMA)             | Para-aortic LNs between the lower border of the left renal vein and the upper border of the origin of the inferior mesenteric artery                                                                                                   | <input type="checkbox"/>                                                |
| 16b2  | Abdominal aorta (IMA to aortic bifurcation)          | Para-aortic LNs between the upper border of the origin of the inferior mesenteric artery and the aortic bifurcation                                                                                                                    | <input type="checkbox"/>                                                |
| 17    | Anterior surface of pancreatic head                  | LNs on the anterior surface of the pancreatic head beneath the pancreatic sheath                                                                                                                                                       | <input type="checkbox"/>                                                |
| 18    | Inferior margin of pancreas                          | LNs along the inferior border of the pancreatic body                                                                                                                                                                                   | <input type="checkbox"/>                                                |
| 19    | Infradiaphragmatic                                   | Infradiaphragmatic LNs predominantly along the subphrenic artery                                                                                                                                                                       | <input type="checkbox"/>                                                |
| 20    | Esophageal hiatus of the diaphragm                   | Paraesophageal LNs in the diaphragmatic esophageal hiatus                                                                                                                                                                              | <input type="checkbox"/>                                                |
| 110   | Paraesophageal lower thorax                          | Paraesophageal LNs in the lower thorax                                                                                                                                                                                                 | <input type="checkbox"/>                                                |
| 111   | Supradiaphragmatic                                   | Supradiaphragmatic LNs separate from the esophagus                                                                                                                                                                                     | <input type="checkbox"/>                                                |
| 112   | Posterior mediastinal                                | Posterior mediastinal LNs separate from the esophagus and the esophageal hiatus                                                                                                                                                        | <input type="checkbox"/>                                                |

\*required for D1 lymphadenectomy

\*\*required for D2 lymphadenectomy

|                          |                                             |
|--------------------------|---------------------------------------------|
| <input type="checkbox"/> | Not required for MEGA trial                 |
| <input type="checkbox"/> | Optional for MEGA trial                     |
| <input type="checkbox"/> | Required for MEGA trial; if not explain why |

14

15

16

17

18 **Appendix 3: Clavien-Dindo-Classification [5]**  
19

| Grades      | Definition                                                                                                                                                                                                                                                                                                                                                   |
|-------------|--------------------------------------------------------------------------------------------------------------------------------------------------------------------------------------------------------------------------------------------------------------------------------------------------------------------------------------------------------------|
| <b>I</b>    | Any deviation from the normal postoperative course without the need for pharmacological treatment or surgical, endoscopic and radiological interventions<br>Allowed therapeutic regimens are: drugs as antiemetics, antipyretics, analgetics, diuretics and electrolytes and physiotherapy. This grade also includes wound infections opened at the bedside. |
| <b>II</b>   | Requiring pharmacological treatment with drugs other than such allowed for grade I complications.<br>Blood transfusions and total parenteral nutrition are also included.                                                                                                                                                                                    |
| <b>III</b>  | Requiring surgical, endoscopic or radiological intervention                                                                                                                                                                                                                                                                                                  |
| <b>IIIa</b> | Intervention not under general anesthesia                                                                                                                                                                                                                                                                                                                    |
| <b>IIIb</b> | Intervention under general anesthesia                                                                                                                                                                                                                                                                                                                        |
| <b>IV</b>   | Life-threatening complication (including CNS complications)* requiring IC/ICU-management                                                                                                                                                                                                                                                                     |
| <b>IVa</b>  | single organ dysfunction (including dialysis)                                                                                                                                                                                                                                                                                                                |
| <b>IVb</b>  | multiorgan dysfunction                                                                                                                                                                                                                                                                                                                                       |
| <b>V</b>    | Death of a patient                                                                                                                                                                                                                                                                                                                                           |

20 \*brain hemorrhage, ischemic stroke, subarachnoidal bleeding, but excluding transient ischemic attacks (TIA); IC: Intermediate  
21 care; ICU: Intensive care unit.  
22

23

24 **Appendix 4: Katz Activities of Daily Living**  
25

| Activities<br>Points (1 or 0) | Independence<br>(1 Point)<br>NO supervision, direction or personal assistance.                                                       | Dependence<br>(0 Points)<br>WITH supervision, direction, personal assistance or total care.                            |
|-------------------------------|--------------------------------------------------------------------------------------------------------------------------------------|------------------------------------------------------------------------------------------------------------------------|
| BATHING<br>Points: _____      | Bathes self completely or needs help in bathing only a single part of the body such as the back, genital area or disabled extremity. | Need help with bathing more than one part of the body, getting in or out of the tub or shower. Requires total bathing. |
| DRESSING<br>Points: _____     | Get clothes from closets and drawers and puts on clothes and outer garments complete with fasteners. May have help tying shoes.      | Needs help with dressing self or needs to be completely dressed.                                                       |
| TOILETING<br>Points: _____    | Goes to toilet, gets on and off, arranges clothes, cleans genital area without help.                                                 | Needs help transferring to the toilet, cleaning self or uses bedpan or commode.                                        |
| TRANSFERRING<br>Points: _____ | Moves in and out of bed or chair unassisted.<br>Mechanical transfer aids are acceptable                                              | Needs help in moving from bed to chair or requires a complete transfer.                                                |
| CONTINENCE<br>Points: _____   | Exercises complete self control over urination and defecation.                                                                       | Is partially or totally incontinent of bowel or bladder.                                                               |
| FEEDING<br>Points: _____      | Gets food from plate into mouth without help.<br>Preparation of food may be done by another person.                                  | Needs partial or total help with feeding or requires parenteral feeding.                                               |

26

27

28

29

30

31

32

33

34

35

36

37

38

39

40

41

42 **Appendix References**

43

- 44 1. Zubrod, C.G., et al., *Appraisal of methods for the study of chemotherapy of cancer in man: Comparative therapeutic trial of nitrogen mustard and triethylene thiophosphoramide*. Journal of  
45 Chronic Diseases, 1960. **11**(1): p. 7-33.
- 46
- 47 2. Oken, M.M., et al., *Toxicity and response criteria of the Eastern Cooperative Oncology Group*.  
48 Am J Clin Oncol, 1982. **5**(6): p. 649-55.
- 49 3. Karnofsky, D.A., *The clinical evaluation of chemotherapeutic agents in cancer*. Evaluation of  
50 chemotherapeutic agents, 1949: p. 191-205.
- 51 4. Japanese Gastric Cancer, A., *Japanese classification of gastric carcinoma: 3rd English*  
52 *edition*. Gastric Cancer, 2011. **14**(2): p. 101-112.
- 53 5. Dindo, D., N. Demartines, and P.-A. Clavien, *Classification of surgical complications: a new*  
54 *proposal with evaluation in a cohort of 6336 patients and results of a survey*. Annals of surgery, 2004.  
55 **240**(2): p. 205-213.

56

57
